# Supplementary material for: Large-scale manipulation of promoter DNA methylation reveals context-specific transcriptional responses and stability
Source: Genome Biol. 2022 Jul 26;23:163. doi: 10.1186/s13059-022-02728-5 (PMC9316731; doi:10.1186/s13059-022-02728-5)
Supplement: Supplementary file 2 — Additional file 2: Supplementary Table S1: WGBS stats, S2: Promoter DMRs, S3: Alternative TSS in ZF-D3A-wt, and S4: Alternative TSS in ZF-D3A-mut. [file 13059_2022_2728_MOESM2_ESM.xlsx]

## Sheet: S1_WGBS_stats
sample	Global_mCG	Lambda non-conversion %	% of covered CpGs	Mean CpG coverage
RL1943_noDox_rep1	66.81	0.29	97.4	13.1
RL1944_noDox_rep2	66.57	0.3	97.47	12.43
RL1945_Dox_rep1	68.45	0.3	97.2	11.83
RL1946_Dox_rep2	68.71	0.31	98.31	16.18
RL1947_DoxWD_rep1	68.28	0.3	97.61	13.23
RL1948_DoxWD_rep2	68.17	0.3	97.54	13.86
RL1949_noDox-mut	66.41	0.3	92.04	4.71
RL1950_Dox-mut	65.88	0.28	94.49	5.14

## Sheet: S2_PromoterDMRs
DMR_loci	gene_id	mCG_NoDox	mCG_Dox	mCG_delta	CpG_number	dmrseq_qval	dmrseq_stat	noDox_expression	Dox_expression	DEseq2_log2FoldChange	DEseq2_padj	DiffExp_inMutant	ZF_peak_inDMR	category
chr12:9216898-9217661	A2M-AS1	0	0.411132	0.411132	73	0.00248077	11.4354	78.3348	28.3351	-1.46117	2.48113e-05	FALSE	FALSE	Downregulated
chr4:171010442-171011385	AADAT	0.0261345	0.372408	0.346274	86	0.000791136	13.6043	722.31	477.263	-0.597091	1.16737e-07	TRUE	FALSE	Downregulated
chr2:69869726-69871209	AAK1	0.00543215	0.335897	0.32932	114	0.000271378	17.6205	2686.87	3124.38	0.217393	0.0438773	FALSE	TRUE	Upregulated
chr11:77530207-77531691	AAMDC	0.0106583	0.522997	0.512338	83	0.000271378	20.7674	738.03	898.163	0.28399	0.0167721	TRUE	TRUE	Upregulated
chr2:219134089-219136400	AAMP	0.0223181	0.268995	0.246677	116	0.000500314	14.7014	7599.26	7552.5	-0.00904233	0.939789	FALSE	TRUE	NoDiff.
chr8:117950348-117950877	AARD	0.00590352	0.401421	0.395518	50	0.0214407	8.12686	336.829	299.044	-0.168745	0.399769	FALSE	FALSE	NoDiff.
chr16:70322036-70323253	AARS	0.00369584	0.257205	0.253509	67	0.000271378	17.7346	25362.7	11054.9	-1.19798	5.24053e-08	TRUE	FALSE	Downregulated
chr7:121783799-121784773	AASS	0.130005	0.410663	0.280659	71	0.00220229	12.0166	204.062	219.729	0.110113	0.696586	FALSE	FALSE	NoDiff.
chr17:79139625-79140422	AATK	0.0523504	0.456921	0.390351	94	0.00191034	12.4798	49.0506	305.663	2.63324	5.86763e-22	TRUE	FALSE	Upregulated
chr16:8767902-8768842	ABAT	0.0335782	0.382155	0.348577	66	0.000271378	19.1791	8140.19	6317.4	-0.365593	0.0926157	FALSE	TRUE	NoDiff.
chr9:107690121-107690606	ABCA1	0.0791396	0.493589	0.414449	34	0.00635215	9.90784	2295.02	1181.11	-0.958811	2.85839e-09	TRUE	TRUE	Downregulated
chr17:67322475-67323976	ABCA5	0.0379288	0.265184	0.227255	127	0.000271378	26.6798	3597.32	6711.87	0.900066	6.69287e-08	TRUE	FALSE	Upregulated
chr19:1039765-1041425	ABCA7	0.0367509	0.284	0.247249	86	0.00453586	10.4123	1140.3	2150.12	0.91413	9.37653e-08	FALSE	FALSE	Upregulated
chr12:123450346-123451206	ABCB9	0.0481252	0.344722	0.298172	56	0.010418	8.96116	800.815	555.017	-0.529549	0.00423745	TRUE	FALSE	Downregulated
chr13:95952794-95954317	ABCC4	0.013689	0.327956	0.313093	146	0.000791136	13.2206	470.302	250.578	-0.910091	2.67209e-05	TRUE	FALSE	Downregulated
chr11:17497828-17498414	ABCC8	0.0705457	0.4149	0.344354	59	0.00499677	10.2727	156.507	62.2524	-1.33272	0.000172364	TRUE	TRUE	Downregulated
chrX:152989323-152990778	ABCD1	0.0381223	0.31646	0.277247	137	0.0031528	10.8746	1227.14	738.35	-0.733228	8.18176e-07	TRUE	TRUE	Downregulated
chr1:94884060-94884816	ABCD3	0.00172414	0.239708	0.236844	64	0.00613238	10.0379	1711.75	1216.81	-0.491835	0.000143607	FALSE	FALSE	Downregulated
chr7:150923672-150924743	ABCF2	0.00769231	0.297375	0.289682	76	0.000271378	15.7892	4287.1	2749.45	-0.64129	2.15661e-06	FALSE	FALSE	Downregulated
chr21:43639328-43640776	ABCG1	0.0185708	0.308179	0.289608	102	0.000271378	19.0467	1071.84	4174.8	1.9606	3.90798e-36	TRUE	TRUE	Upregulated
chr4:89079587-89079963	ABCG2	0.0107413	0.267824	0.257083	34	0.00635215	9.92337	884.176	1172.53	0.406923	0.00722165	FALSE	FALSE	Upregulated
chr11:119019594-119020324	ABCG4	0.0517395	0.346343	0.29483	79	0.00479912	10.3092	8.85107	60.4901	2.7566	3.69584e-10	FALSE	TRUE	Upregulated
chr7:73153559-73154159	ABHD11	0.195174	0.432533	0.237359	34	0.00238362	11.5546	3362.59	3573.62	0.0879513	0.552921	FALSE	FALSE	NoDiff.
chr7:73149033-73149511	ABHD11-AS1	0.0479097	0.401667	0.353757	7	0.0388136	7.39371	27.9983	96.5142	1.79818	9.57671e-08	TRUE	FALSE	Upregulated
chr20:25370260-25371852	ABHD12	0.0121052	0.317136	0.302383	166	0.000271378	20.1066	3864.47	2230.57	-0.793138	3.11781e-12	FALSE	TRUE	Downregulated
chr13:108870231-108871514	ABHD13	0.00760591	0.223803	0.204067	102	0.000791136	13.1727	693.299	506.355	-0.452059	0.00425118	FALSE	FALSE	Downregulated
chr17:27893868-27896290	ABHD15	0.0156209	0.371462	0.359157	234	0.000271378	23.5223	832.287	962.588	0.20842	0.271622	TRUE	FALSE	NoDiff.
chr6:31670005-31670661	ABHD16A	0.028956	0.273378	0.244422	18	0.00401987	10.5074	2278.39	4354.74	0.934242	1.72286e-21	FALSE	FALSE	Upregulated
chr15:80986715-80988407	ABHD17C	0.0249992	0.263084	0.245523	190	0.00220229	12.0454	1731.96	1491.21	-0.215381	0.247322	FALSE	FALSE	NoDiff.
chr18:19284375-19285008	ABHD3	0.00475537	0.283626	0.27887	68	0.000271378	16.8338	1311.91	2977.03	1.18135	6.35528e-13	TRUE	FALSE	Upregulated
chr14:23066924-23067727	ABHD4	0.00343538	0.256571	0.253135	47	0.00280792	11.0342	1752.47	2512.72	0.519449	2.36157e-05	TRUE	FALSE	Upregulated
chr3:43731533-43733843	ABHD5	0.0403821	0.336641	0.286227	173	0.000271378	18.0404	1456.72	907.206	-0.68325	2.90489e-10	TRUE	FALSE	Downregulated
chr10:27148899-27150228	ABI1	0.00408452	0.473973	0.469889	95	0.000271378	22.6846	4363.47	1062.99	-2.03734	2.90248e-92	TRUE	TRUE	Downregulated
chr2:204192656-204194679	ABI2	0.0393081	0.385099	0.345791	139	0.000271378	14.9579	4977.3	1937.61	-1.36099	5.13375e-77	FALSE	TRUE	Downregulated
chr9:133588674-133589320	ABL1	0.00458292	0.267856	0.263273	36	0.000791136	13.4131	4338.36	4779.91	0.139484	0.118633	FALSE	FALSE	NoDiff.
chr1:179197671-179199199	ABL2	0.0606664	0.492741	0.436781	115	0.000271378	20.4995	3150.78	1599.48	-0.978367	9.9184e-26	FALSE	TRUE	Downregulated
chr10:116286502-116286911	ABLIM1	0.0272854	0.258565	0.231279	15	0.0491851	7.0741	1134.79	1410.89	0.313899	0.00146157	FALSE	FALSE	Upregulated
chr17:1011647-1012845	ABR	0.00396825	0.507557	0.512821	121	0.000271378	19.1503	5760.99	3229.04	-0.835499	2.24865e-15	FALSE	TRUE	Downregulated
chr6:139349484-139350705	ABRACL	0.00403088	0.328721	0.32469	106	0.000271378	17.3598	2246.09	899.392	-1.32048	2.02592e-29	FALSE	FALSE	Downregulated
chr3:127391112-127392593	ABTB1	0.111866	0.329669	0.217189	158	0.00238362	11.5403	669.802	1052.33	0.652568	0.00198689	FALSE	TRUE	Upregulated
chr11:34379757-34380709	ABTB2	0.00117925	0.385593	0.384414	53	0.000271378	16.1506	1905.55	2175.9	0.191445	0.0118436	FALSE	FALSE	Upregulated
chr17:35766403-35766770	ACACA	0	0.293378	0.293378	22	0.0281063	7.78621	5793.08	8083.14	0.480492	5.1604e-06	FALSE	FALSE	Upregulated
chr1:76190140-76190666	ACADM	0.00396096	0.276396	0.272435	45	0.00981226	9.05661	1476.61	1242.01	-0.249494	0.0396394	FALSE	FALSE	Downregulated
chr17:7117735-7121230	ACADVL	0.21083	0.490083	0.279054	98	0.00218775	12.3482	9580.39	7660.2	-0.322721	0.000356466	TRUE	TRUE	Downregulated
chr1:1243957-1245708	ACAP3	0.0541599	0.444157	0.383279	152	0.000271378	16.8572	2370.93	3905.36	0.719484	8.69562e-07	TRUE	FALSE	Upregulated
chr1:226373894-226374518	ACBD3	0.00117096	0.26173	0.260559	59	0.00220229	11.9499	3924.51	5551.27	0.500492	1.16043e-07	FALSE	FALSE	Upregulated
chr17:43210016-43210536	ACBD4	0.00775194	0.381791	0.376719	40	0.0124067	8.7904	534.792	516.248	-0.0489244	0.777737	TRUE	FALSE	NoDiff.
chr17:43213031-43213456	ACBD4	0.0602805	0.328163	0.267883	19	0.00863662	9.29393	534.792	516.248	-0.0489244	0.777737	TRUE	FALSE	NoDiff.
chr10:27529219-27529715	ACBD5	0.00315457	0.238478	0.235323	38	0.00111136	12.8508	4118.75	4159.75	0.0146273	0.911503	FALSE	FALSE	NoDiff.
chr1:180470680-180472000	ACBD6	0.0027559	0.357483	0.354727	79	0.000271378	21.259	2674.96	1191.8	-1.16585	2.05086e-33	TRUE	TRUE	Downregulated
chr10:15130071-15130912	ACBD7	0.0597609	0.443142	0.383381	59	0.00218775	12.3698	2160.94	625.394	-1.78855	2.46686e-52	TRUE	FALSE	Downregulated
chr11:44087832-44088504	ACCS	0.0364584	0.238861	0.202403	39	0.00878586	9.25757	943.305	1008.02	0.096732	0.563737	FALSE	FALSE	NoDiff.
chr17:61554228-61554720	ACE	0.0322344	0.436293	0.404059	60	0.000271378	15.3395	67.8331	61.0341	-0.145425	0.653213	FALSE	TRUE	NoDiff.
chr9:19408334-19409874	ACER2	0.0767562	0.299483	0.218595	96	0.00635215	9.98069	432.415	589.91	0.44981	0.00152318	TRUE	FALSE	Upregulated
chr11:76572008-76572937	ACER3	0.0215517	0.335032	0.31348	36	0.000271378	15.4604	1863.28	2345.02	0.331038	0.00244368	FALSE	FALSE	Upregulated
chr7:100493024-100494102	ACHE	0.0938413	0.467406	0.373565	107	0.000271378	15.8571	90.3358	59.3589	-0.609998	0.0913035	FALSE	TRUE	NoDiff.
chr14:23540097-23540892	ACIN1	0.00342692	0.377643	0.374216	18	0.000271378	17.2044	23436.3	25178.8	0.103473	0.21426	FALSE	TRUE	NoDiff.
chr17:40075568-40076212	ACLY	0.0431918	0.403274	0.360082	22	0.00635215	9.98363	14730.4	33294.1	1.17641	2.76419e-19	FALSE	FALSE	Upregulated
chr9:32384147-32384544	ACO1	0.0173611	0.362028	0.391854	22	0.00401987	10.5308	1739.26	2627.78	0.594886	3.77744e-10	FALSE	FALSE	Upregulated
chr1:6445130-6446294	ACOT7	0.253023	0.502162	0.249139	32	0.0881505	6.30492	1395.69	1664.21	0.253283	0.272569	FALSE	FALSE	NoDiff.
chr2:263013-265310	ACP1	0.00937733	0.318035	0.311153	191	0.000271378	24.7056	6991.59	4589.36	-0.607212	2.30973e-14	TRUE	TRUE	Downregulated
chr3:132036067-132036745	ACPP	0.00635593	0.21819	0.211834	6	0.0180657	8.35521	91.0129	291.282	1.68538	2.16428e-08	FALSE	FALSE	Upregulated
chr17:48503357-48503825	ACSF2	0.00749354	0.29386	0.293625	50	0.0376747	7.42915	960.195	639.123	-0.585885	2.94277e-06	FALSE	TRUE	Downregulated
chr20:25039707-25040106	ACSS1	0.201766	0.432116	0.230349	6	0.0784991	6.46173	476.916	2040.82	2.09904	2.56335e-17	TRUE	FALSE	Upregulated
chr10:90750294-90750984	ACTA2	0.0227064	0.460448	0.437742	53	0.000271378	16.242	268.366	193.771	-0.467669	0.0100886	TRUE	TRUE	Downregulated
chr7:5570476-5572125	ACTB	0.193409	0.483366	0.289957	55	0.00613238	10.0382	206191	191615	-0.105777	0.501696	FALSE	TRUE	NoDiff.
chr17:79479603-79482127	ACTG1	0.0303097	0.263126	0.227829	286	0.000271378	18.8198	141007	90404	-0.641313	5.58861e-23	TRUE	TRUE	Downregulated
chr20:32250817-32252329	ACTL10	0.077933	0.296608	0.218675	94	0.000668406	13.7461	153.166	184.075	0.26728	0.297229	FALSE	FALSE	NoDiff.
chr14:69444180-69447182	ACTN1	0.0313986	0.360698	0.328439	222	0.000271378	22.657	10854.5	9297.74	-0.223435	0.0836608	TRUE	TRUE	NoDiff.
chr11:66312755-66314196	ACTN3	0.137075	0.349111	0.212036	97	0.000791136	13.5097	7.83433	89.1865	3.49208	7.68648e-14	FALSE	TRUE	Upregulated
chr10:104264226-104264795	ACTR1A	0.0758788	0.372186	0.296307	23	0.00220229	12.2036	5011.64	6238.39	0.31561	0.00313667	FALSE	FALSE	Upregulated
chr2:98279143-98280384	ACTR1B	0.0491602	0.293151	0.24399	72	0.000271378	14.9623	5322.77	3401.4	-0.645754	4.81424e-11	TRUE	FALSE	Downregulated
chr2:65454944-65455550	ACTR2	0.00127877	0.248479	0.2472	54	0.000271378	16.4195	29631.1	28964.1	-0.0328807	0.806801	FALSE	FALSE	NoDiff.
chr2:114647549-114648635	ACTR3	0.00584141	0.413202	0.40736	76	0.000271378	28.0739	11620.1	6066.66	-0.937758	2.13707e-20	TRUE	TRUE	Downregulated
chr7:152456854-152457606	ACTR3B	0.00574482	0.282023	0.276278	81	0.000271378	21.6686	578.646	585.336	0.0148344	0.942383	FALSE	FALSE	NoDiff.
chr12:100592880-100594036	ACTR6	0.0353038	0.325268	0.289964	94	0.000271378	17.4762	1907.23	1956.8	0.0377443	0.782608	FALSE	FALSE	NoDiff.
chr3:169487120-169487586	ACTRT3	0	0.361427	0.361427	44	0.000791136	13.6262	151.513	141.618	-0.0975754	0.636156	FALSE	FALSE	NoDiff.
chr2:158731796-158733252	ACVR1	0.00793113	0.591329	0.579448	144	0.000271378	28.7475	995.673	183.301	-2.44203	9.44376e-106	FALSE	TRUE	Downregulated
chr12:52344914-52346686	ACVR1B	0.0439597	0.409734	0.366428	146	0.000271378	21.739	5373.58	2561.41	-1.06888	1.23763e-24	TRUE	TRUE	Downregulated
chr3:38494794-38496764	ACVR2B	0.00504545	0.315612	0.305089	192	0.000271378	20.609	2197.81	1668.2	-0.397136	0.00518299	FALSE	FALSE	Downregulated
chr3:38494794-38496764	ACVR2B-AS1	0.00504545	0.315612	0.305089	192	0.000271378	20.609	99.4742	75.3029	-0.402468	0.3375	FALSE	FALSE	NoDiff.
chr3:52016508-52017478	ACY1	0.00623465	0.24641	0.240175	60	0.000500314	14.7032	323.999	610.789	0.914177	3.98467e-10	FALSE	FALSE	Upregulated
chr2:54342498-54343079	ACYP2	0.000891266	0.409895	0.409003	49	0.000271378	18.2194	346.95	206.116	-0.751028	4.86365e-06	FALSE	TRUE	Downregulated
chr20:43280317-43281505	ADA	0.0907097	0.47556	0.379946	85	0.000668406	14.0684	185.803	202.583	0.121268	0.739949	FALSE	FALSE	NoDiff.
chr15:43621895-43622489	ADAL	0.00405062	0.236318	0.232267	58	0.0175107	8.39436	476.979	433.882	-0.135597	0.317028	FALSE	FALSE	NoDiff.
chr15:59040869-59042029	ADAM10	0.00453859	0.493402	0.495411	107	0.000271378	27.4169	3965.42	2288.58	-0.792862	2.17726e-13	FALSE	TRUE	Downregulated
chr17:42836438-42836931	ADAM11	0	0.463855	0.460327	54	0.00635215	9.89814	348.033	339.161	-0.0391057	0.878678	FALSE	FALSE	NoDiff.
chr1:155023747-155025220	ADAM15	0.0219012	0.336908	0.315007	76	0.000271378	17.0326	5292.31	7609.21	0.52355	9.64351e-07	FALSE	TRUE	Upregulated
chr2:9694779-9696659	ADAM17	0.0102467	0.216884	0.206794	118	0.000500314	14.6937	3711.37	2818.08	-0.397264	9.29182e-06	FALSE	FALSE	Downregulated
chr7:87563525-87564382	ADAM22	0.0125485	0.284536	0.271988	60	0.000271378	17.9916	1142.2	1345.96	0.23798	0.0536201	FALSE	FALSE	NoDiff.
chr10:135092199-135092922	ADAM8	0.126028	0.375199	0.249171	27	0.0527734	7.00562	717.955	988.771	0.460735	0.00487324	FALSE	TRUE	Upregulated
chr5:128795058-128798254	ADAMTS19	0.0361999	0.391412	0.355212	203	0.000271378	24.9621	7502.28	2227.31	-1.75174	3.57376e-43	TRUE	TRUE	Downregulated
chr5:128795058-128798254	ADAMTS19-AS1	0.0361999	0.391412	0.355212	203	0.000271378	24.9621	1074.11	490.931	-1.12896	1.72496e-14	FALSE	TRUE	Downregulated
chr5:64777678-64778324	ADAMTS6	0.00675555	0.461944	0.455188	13	0.00499677	10.2621	135.469	79.6752	-0.759262	0.00314087	FALSE	TRUE	Downregulated
chr15:79102672-79104025	ADAMTS7	0.229937	0.512911	0.282974	144	0.00248077	11.5243	49.1429	102.909	1.05722	0.0016814	TRUE	TRUE	Upregulated
chr3:64673683-64674587	ADAMTS9	0.348508	0.741452	0.392944	44	0.000791136	13.3873	288.159	125.752	-1.19813	5.44162e-06	TRUE	TRUE	Downregulated
chr15:84322263-84323023	ADAMTSL3	0.0703527	0.283008	0.201308	107	0.0855376	6.34234	85.2692	49.9393	-0.769691	0.0176605	FALSE	FALSE	Downregulated
chr19:1512962-1514019	ADAMTSL5	0.0248518	0.277893	0.323805	119	0.00272278	11.3746	548.711	188.434	-1.54101	1.21407e-26	FALSE	FALSE	Downregulated
chr7:966828-967277	ADAP1	0.24102	0.569292	0.328272	16	0.00895022	9.23002	975.517	548.282	-0.832597	4.87166e-07	TRUE	FALSE	Downregulated
chr7:993167-994461	ADAP1	0.0137378	0.294288	0.280572	163	0.000271378	16.4585	975.517	548.282	-0.832597	4.87166e-07	TRUE	FALSE	Downregulated
chr1:154581019-154581347	ADAR	0.00323541	0.327578	0.324343	26	0.0430165	7.24807	21932.2	24079.6	0.134766	0.153699	FALSE	FALSE	NoDiff.
chr21:46493210-46493523	ADARB1	0.0311767	0.235307	0.20413	14	0.080448	6.42139	4715.67	6233.45	0.402739	0.00155391	FALSE	FALSE	Upregulated
chr7:140372781-140373784	ADCK2	0.0482117	0.293999	0.248166	96	0.00635215	9.94354	1425.3	1962.46	0.460753	2.98629e-07	TRUE	FALSE	Upregulated
chr19:41221318-41225463	ADCK4	0.0167977	0.246826	0.230028	157	0.000271378	18.358	1116.95	1152.75	0.0451519	0.787948	TRUE	FALSE	NoDiff.
chr8:145596392-145596906	ADCK5	0.186043	0.606557	0.420514	5	0.0411384	7.30378	1148.57	1120.33	-0.036416	0.854282	FALSE	TRUE	NoDiff.
chr2:25141948-25143734	ADCY3	0.0577164	0.391329	0.334758	195	0.000271378	22.737	1639.75	1226.77	-0.419386	0.0281718	TRUE	FALSE	Downregulated
chr3:123167498-123169298	ADCY5	0.0624969	0.465575	0.403643	200	0.000271378	21.3643	490.929	1444.19	1.55534	1.52938e-16	TRUE	TRUE	Upregulated
chr12:49181554-49183554	ADCY6	0.0592436	0.466757	0.406504	122	0.000271378	15.5689	6303.47	1709.49	-1.88224	8.33105e-54	TRUE	TRUE	Downregulated
chr16:4166550-4166994	ADCY9	0.00995771	0.208403	0.202916	53	0.0167184	8.42234	4872.66	4478.47	-0.121568	0.236444	TRUE	FALSE	NoDiff.
chr4:2845847-2846454	ADD1	0.00483656	0.22247	0.218261	48	0.00238362	11.6144	7061.12	5333.08	-0.405095	2.34466e-07	FALSE	FALSE	Downregulated
chr10:111767296-111768683	ADD3	0.0573444	0.386439	0.327814	123	0.000271378	16.6071	854.8	745.247	-0.196985	0.272328	TRUE	FALSE	NoDiff.
chr4:22517028-22518113	ADGRA3	0.0115643	0.444982	0.403602	138	0.000271378	17.7901	1903.09	371.468	-2.35829	1.01741e-139	TRUE	TRUE	Downregulated
chr1:32228003-32230189	ADGRB2	0.0347524	0.470055	0.426702	204	0.000271378	22.6315	180.996	57.1851	-1.66887	9.64647e-10	TRUE	TRUE	Downregulated
chr19:14886855-14888109	ADGRE2	0.18199	0.453418	0.269877	44	0.0345803	7.53936	25.7921	62.4274	1.27656	0.00379534	FALSE	FALSE	Upregulated
chr19:14491848-14492418	ADGRE5	0.0356496	0.362262	0.326612	24	0.0082215	9.46026	1248.72	1708.7	0.453159	5.86407e-05	TRUE	FALSE	Upregulated
chr16:57653336-57657514	ADGRG1	0.245493	0.565489	0.319996	86	0.00320424	10.8434	5436.57	2503.17	-1.11879	5.94526e-33	TRUE	TRUE	Downregulated
chrX:19139635-19140880	ADGRG2	0.259803	0.644367	0.375915	145	0.000791136	13.1357	50.1339	62.5554	0.323984	0.370425	FALSE	FALSE	NoDiff.
chr19:14316036-14318429	ADGRL1	0.00790515	0.384513	0.371647	271	0.000271378	23.9001	3956.94	3431.15	-0.205983	0.289441	FALSE	TRUE	NoDiff.
chr1:82266133-82269600	ADGRL2	0.0815444	0.379911	0.29756	281	0.000271378	23.2236	303.857	118.676	-1.35979	3.84347e-09	TRUE	FALSE	Downregulated
chr5:89854238-89854979	ADGRV1	0.00419833	0.437653	0.433455	59	0.000271378	15.6426	1782.79	1055.03	-0.756203	4.17649e-10	TRUE	TRUE	Downregulated
chr8:67341879-67342870	ADHFE1	0.0151722	0.364453	0.349281	38	0.000271378	15.0077	238.613	439.663	0.884315	0.00881799	FALSE	FALSE	Upregulated
chr1:202926513-202928021	ADIPOR1	0.0469829	0.262995	0.216012	101	0.000668406	13.8472	8950.19	11020.3	0.300027	0.000899087	FALSE	TRUE	Upregulated
chr12:1800347-1801041	ADIPOR2	0.00650755	0.351961	0.345453	52	0.000271378	16.4553	11585.8	14085.4	0.281764	0.013428	TRUE	FALSE	Upregulated
chr11:10324369-10326672	ADM	0.0271122	0.286081	0.260403	122	0.000271378	17.1905	125.198	89.5037	-0.483164	0.0266181	FALSE	FALSE	Downregulated
chr22:50919982-50920669	ADM2	0.114802	0.480348	0.34389	59	0.0547125	6.94653	496.019	199.267	-1.3153	0.100217	TRUE	TRUE	NoDiff.
chr20:49545837-49547850	ADNP	0.0360877	0.323983	0.288077	138	0.000271378	17.3739	14429.6	10776.7	-0.421139	2.83703e-12	TRUE	TRUE	Downregulated
chr20:49545837-49547850	ADNP-AS1	0.0360877	0.323983	0.288077	138	0.000271378	17.3739	458.085	281.316	-0.702506	1.56372e-06	FALSE	TRUE	Downregulated
chr1:203095196-203095800	ADORA1	0.23755	0.669183	0.431632	7	0.00974231	9.07043	155.996	117.077	-0.411916	0.0606952	TRUE	TRUE	NoDiff.
chr3:119298222-119298902	ADPRH	0.0220892	0.301385	0.279296	67	0.00376152	10.6322	147.958	146.597	-0.0107744	0.976683	TRUE	FALSE	NoDiff.
chr4:3767103-3767971	ADRA2C	0.0510096	0.450357	0.416675	139	0.000271378	15.7438	1091.77	504.651	-1.11411	5.07257e-10	FALSE	FALSE	Downregulated
chr22:25959761-25961706	ADRBK2	0.0555189	0.389037	0.341836	155	0.000271378	15.337	738.326	252.052	-1.55035	3.66131e-34	TRUE	TRUE	Downregulated
chr20:60876994-60877467	ADRM1	0.00172414	0.374593	0.372868	21	0.000500314	14.4723	8355.6	10326.7	0.305417	0.100578	FALSE	TRUE	NoDiff.
chr14:105190401-105191766	ADSSL1	0.117095	0.490856	0.37376	87	0.000271378	14.8358	513.125	946.221	0.881039	7.74748e-14	TRUE	TRUE	Upregulated
chr12:19592402-19593651	AEBP2	0.00580987	0.355613	0.341713	137	0.000271378	17.0464	2491.81	975.977	-1.35211	3.08715e-48	FALSE	FALSE	Downregulated
chr4:87855753-87857486	AFF1	0.0113063	0.243614	0.233775	143	0.000271378	19.3283	3258.69	4522.23	0.473126	6.85037e-05	TRUE	FALSE	Upregulated
chr4:87928304-87929168	AFF1	0.00608295	0.418139	0.412056	57	0.000271378	19.2216	3258.69	4522.23	0.473126	6.85037e-05	TRUE	FALSE	Upregulated
chr17:76182221-76183023	AFMID	0.194708	0.475639	0.280931	22	0.00320424	10.8179	1335.54	2791	1.06373	9.06597e-33	FALSE	TRUE	Upregulated
chr2:64751569-64753263	AFTPH	0.0486415	0.464141	0.4155	72	0.000271378	15.1882	3169.81	2501.68	-0.341005	0.00440028	FALSE	TRUE	Downregulated
chr2:236402173-236402670	AGAP1	0.0226574	0.290011	0.268303	65	0.0375299	7.43413	2789.72	2612.73	-0.0943866	0.327195	FALSE	FALSE	NoDiff.
chr12:58131300-58131888	AGAP2	0.0285081	0.406188	0.378865	64	0.000271378	18.2728	624.582	1161.24	0.894676	2.03159e-16	FALSE	FALSE	Upregulated
chr12:58119522-58120586	AGAP2-AS1	0.0254148	0.299948	0.274533	82	0.000271378	16.0314	549.86	551.651	0.00511107	0.975015	FALSE	TRUE	NoDiff.
chr7:150780060-150781308	AGAP3	0.1338	0.390142	0.253469	78	0.000500314	14.5087	4515.13	2824.18	-0.677329	4.01097e-08	FALSE	TRUE	Downregulated
chr7:150782420-150785506	AGAP3	0.0966501	0.358864	0.266246	248	0.000271378	17.2188	4515.13	2824.18	-0.677329	4.01097e-08	FALSE	TRUE	Downregulated
chr11:47736182-47737003	AGBL2	0.037821	0.264407	0.226586	42	0.00401987	10.5436	188.822	144.434	-0.381995	0.148909	TRUE	FALSE	NoDiff.
chr2:228336996-228338029	AGFG1	0.00559302	0.272627	0.265828	112	0.000500314	14.618	3191.14	2553.32	-0.322184	0.00550493	FALSE	FALSE	Downregulated
chr7:100136832-100137643	AGFG2	0.00506486	0.412143	0.407078	69	0.000271378	23.4114	794.89	842.079	0.0820979	0.650856	TRUE	TRUE	NoDiff.
chr1:36348792-36349669	AGO1	0.00681818	0.395727	0.394166	65	0.00621285	10.0203	3354.41	1840.96	-0.865968	1.91875e-12	TRUE	FALSE	Downregulated
chr8:141644143-141646615	AGO2	0.00933194	0.280937	0.274669	278	0.000271378	22.5186	2218.65	1202.14	-0.884619	4.71715e-09	FALSE	FALSE	Downregulated
chr1:36396838-36397294	AGO3	0.00370477	0.222848	0.219912	49	0.0539592	6.95745	594.178	633.816	0.0916931	0.498934	FALSE	FALSE	NoDiff.
chr1:36273317-36274318	AGO4	0.0244081	0.441604	0.421199	134	0.000271378	16.2027	1388.29	381.871	-1.8612	6.26587e-38	TRUE	FALSE	Downregulated
chr6:32143348-32144195	AGPAT1	0.0351654	0.288089	0.252923	27	0.00111136	12.8836	2711.38	2346.2	-0.209085	0.031773	FALSE	TRUE	Downregulated
chr6:32146595-32147247	AGPAT1	0.183545	0.393099	0.209554	8	0.0253723	7.90355	2711.38	2346.2	-0.209085	0.031773	FALSE	FALSE	Downregulated
chr9:139580970-139582466	AGPAT2	0.03854	0.407284	0.369246	152	0.000271378	14.9927	1425.49	263.125	-2.43952	2.26814e-52	TRUE	TRUE	Downregulated
chr21:45284446-45285898	AGPAT3	0.00753589	0.425928	0.395865	215	0.000271378	24.6132	5718.12	1139.61	-2.32688	7.08937e-112	FALSE	TRUE	Downregulated
chr6:161694812-161695453	AGPAT4	0.0766763	0.382265	0.305589	18	0.00364727	10.6441	12.3713	61.2104	2.31617	4.40099e-08	TRUE	FALSE	Upregulated
chr4:84456586-84457579	AGPAT9	0.00975537	0.39202	0.382264	74	0.000668406	13.7789	355.548	186.919	-0.924379	1.8737e-05	TRUE	TRUE	Downregulated
chr1:955468-957292	AGRN	0.00938438	0.454189	0.431903	140	0.00238362	11.6534	10875.2	6179.06	-0.815678	6.55445e-13	FALSE	TRUE	Downregulated
chr9:88356393-88356782	AGTPBP1	0.00363636	0.211242	0.209554	43	0.0719277	6.57738	865.71	1085.5	0.326634	0.00396612	FALSE	FALSE	Upregulated
chr1:11795897-11796931	AGTRAP	0.0391961	0.367775	0.334827	65	0.0124067	8.78842	653.676	362.601	-0.850995	0.000102128	FALSE	FALSE	Downregulated
chr2:241807708-241808263	AGXT	0.252921	0.461847	0.208927	13	0.0764578	6.50203	7.13917	105.577	3.90203	0.00158353	FALSE	FALSE	Upregulated
chr1:247094415-247095210	AHCTF1	0.00103093	0.275686	0.273734	112	0.000271378	15.109	4943.07	3118.68	-0.664793	7.07575e-09	FALSE	FALSE	Downregulated
chr20:32899002-32900614	AHCY	0.071785	0.447045	0.37526	66	0.00272278	11.236	10162.6	10734.4	0.0790946	0.42715	TRUE	TRUE	NoDiff.
chr1:110527292-110528235	AHCYL1	0.0100357	0.217403	0.207367	84	0.000668406	14.1138	11540.3	12760.8	0.144947	0.126906	FALSE	FALSE	NoDiff.
chr1:110546508-110547385	AHCYL1	0.161797	0.50284	0.341043	8	0.0366887	7.45091	11540.3	12760.8	0.144947	0.126906	FALSE	FALSE	NoDiff.
chr7:128864343-128865899	AHCYL2	0.00378895	0.357821	0.354033	122	0.000271378	24.3145	2103.54	1410.19	-0.576415	2.34115e-06	TRUE	TRUE	Downregulated
chr1:27928475-27930637	AHDC1	0.0247678	0.62854	0.613473	139	0.000271378	26.2333	1017.73	295.18	-1.78691	2.03476e-20	TRUE	TRUE	Downregulated
chr11:62316127-62316449	AHNAK	0.209551	0.554889	0.345338	9	0.0396058	7.35725	64317.3	66537	0.0489653	0.812991	TRUE	TRUE	NoDiff.
chr9:133971515-133972709	AIF1L	0.0180499	0.551983	0.532535	116	0.000271378	21.2783	7180.72	2075.79	-1.79055	1.04633e-26	FALSE	TRUE	Downregulated
chrX:129299387-129299742	AIFM1	0	0.430541	0.430541	28	0.0125558	8.78003	5673.24	4330.64	-0.389628	0.00117861	TRUE	FALSE	Downregulated
chr10:71891900-71892801	AIFM2	0.108786	0.349225	0.240439	82	0.00111136	12.7815	827.637	1368.35	0.724196	0.000428974	TRUE	FALSE	Upregulated
chr6:143381990-143382498	AIG1	0.0595915	0.376227	0.316636	34	0.00238362	11.6745	1635.5	2128.56	0.380648	0.00011613	FALSE	FALSE	Upregulated
chr6:106958556-106959037	AIM1	0.218116	0.648595	0.430479	22	0.000500314	14.4997	5516.81	3820.9	-0.529983	0.000198481	FALSE	FALSE	Downregulated
chr1:26680163-26681065	AIM1L	0.0781356	0.532025	0.453889	17	0.0297199	7.73137	85.4071	1843.84	4.42438	2.29596e-169	FALSE	TRUE	Upregulated
chr11:67250585-67250925	AIP	0.0239983	0.354046	0.330048	26	0.080525	6.42017	3302.5	4561.23	0.465835	1.73073e-05	TRUE	TRUE	Upregulated
chr14:23449693-23452417	AJUBA	0.0523436	0.303042	0.250719	220	0.000271378	19.7981	3279.81	3734.19	0.187347	0.118799	FALSE	TRUE	NoDiff.
chr9:130639758-130640142	AK1	0.008169	0.305418	0.297249	47	0.0388136	7.396	831.569	1610.49	0.952753	9.1704e-10	FALSE	FALSE	Upregulated
chr9:4741448-4742322	AK3	0.0501894	0.44368	0.39349	46	0.0158705	8.52832	3567.92	3310.91	-0.107478	0.305897	FALSE	FALSE	NoDiff.
chr1:65613055-65614987	AK4	0.0205933	0.483743	0.465666	198	0.000271378	21.7789	1112.45	310.75	-1.84165	1.769e-42	TRUE	TRUE	Downregulated
chr9:135754212-135754445	AK8	0.0566241	0.273471	0.216847	19	0.0205273	8.16711	85.1633	62.925	-0.433917	0.104056	FALSE	FALSE	NoDiff.
chr6:110012728-110013000	AK9	0	0.22088	0.22088	6	0.00833757	9.40406	391.86	653.941	0.740727	4.44892e-10	FALSE	FALSE	Upregulated
chr17:19880589-19881085	AKAP10	0.00144509	0.267059	0.259615	37	0.00550983	10.1954	2023.25	1593.02	-0.344351	0.00200705	FALSE	FALSE	Downregulated
chr13:42846300-42846852	AKAP11	0.00237659	0.241476	0.239099	54	0.00111136	12.9146	6957.17	7249.44	0.0593688	0.590153	FALSE	FALSE	NoDiff.
chr6:151646729-151646940	AKAP12	0.0655348	0.306759	0.241225	18	0.0726066	6.56896	142.564	126.916	-0.169739	0.50455	FALSE	FALSE	NoDiff.
chr15:85922671-85923190	AKAP13	0.0296117	0.271555	0.241943	11	0.00833757	9.3876	5160.5	5763.38	0.159595	0.2238	FALSE	FALSE	NoDiff.
chr12:4758671-4758904	AKAP3	0.0025	0.218854	0.216354	5	0.00218775	12.2458	136.532	219.327	0.683853	0.000993554	TRUE	FALSE	Upregulated
chr14:64931308-64933020	AKAP5	0.0597065	0.393188	0.333482	98	0.000271378	15.409	490.841	135.53	-1.85632	2.9862e-15	FALSE	TRUE	Downregulated
chr19:15490981-15491427	AKAP8	0.0254036	0.503183	0.477779	34	0.00470945	10.3471	2382.88	3725.9	0.644427	1.12325e-15	FALSE	TRUE	Upregulated
chr7:91569552-91571285	AKAP9	0.00931297	0.29567	0.286358	82	0.000271378	19.7875	8846.52	12880.5	0.542123	2.03722e-05	FALSE	TRUE	Upregulated
chr11:8931677-8932134	AKIP1	0.0354923	0.386855	0.351363	24	0.021686	8.10704	680.083	366.58	-0.89302	3.54084e-10	TRUE	FALSE	Downregulated
chr6:88410633-88411919	AKIRIN2	0.0017457	0.226484	0.224739	111	0.000271378	18.6104	4255.22	2227.7	-0.933729	1.56637e-27	TRUE	FALSE	Downregulated
chr10:4868560-4869003	AKR1E2	0.231513	0.469387	0.237874	44	0.0650256	6.71789	710.37	428.033	-0.7305	1.75517e-07	FALSE	FALSE	Downregulated
chr14:105260301-105261539	AKT1	0.0417728	0.361171	0.319398	57	0.000271378	21.3855	24207.3	45227.1	0.901692	1.2872e-14	TRUE	TRUE	Upregulated
chr14:105263640-105264225	AKT1	0.548389	0.812707	0.264317	11	0.0300565	7.72014	24207.3	45227.1	0.901692	1.2872e-14	TRUE	TRUE	Upregulated
chr19:50381379-50381928	AKT1S1	0.0593511	0.341961	0.282609	24	0.0662565	6.68888	3407.52	5348.88	0.650166	1.50576e-07	FALSE	FALSE	Upregulated
chr3:105083963-105087827	ALCAM	0.00959808	0.43773	0.428239	160	0.000271378	28.6766	6669.83	2122.4	-1.6518	6.45977e-20	FALSE	TRUE	Downregulated
chr15:101419506-101420185	ALDH1A3	0.0118693	0.29408	0.286867	106	0.00177479	12.5907	177.033	511.365	1.52704	2.11832e-06	TRUE	FALSE	Upregulated
chr9:38392068-38393186	ALDH1B1	0.127812	0.443506	0.310746	67	0.010418	8.97986	1606.83	1281.03	-0.327542	0.0277821	TRUE	FALSE	Downregulated
chr17:19551017-19552533	ALDH3A2	0.0495709	0.426088	0.375568	106	0.000271378	16.874	3213.11	1560.36	-1.04172	8.01258e-27	TRUE	TRUE	Downregulated
chr11:67777473-67777965	ALDH3B1	0.0740873	0.549697	0.47561	17	0.00177479	12.5266	404.396	699.591	0.792597	8.07013e-11	TRUE	TRUE	Upregulated
chr11:67441615-67442249	ALDH3B2	0.0998793	0.387423	0.287543	12	0.0082215	9.463	1516.01	6673.12	2.13882	1.45332e-29	FALSE	FALSE	Upregulated
chr6:24494898-24495859	ALDH5A1	0.00836399	0.438515	0.430151	101	0.000271378	19.2559	3332.41	1878.8	-0.826489	4.31682e-21	FALSE	FALSE	Downregulated
chr14:74550556-74550997	ALDH6A1	0.0218426	0.27121	0.249367	16	0.00238362	11.5766	4543.97	4456.57	-0.0277012	0.856185	TRUE	FALSE	NoDiff.
chr5:125930602-125931166	ALDH7A1	0.00396074	0.278741	0.27478	38	0.00272278	11.2882	5142.35	3907.64	-0.39623	0.000792692	FALSE	FALSE	Downregulated
chr16:30075145-30078077	ALDOA	0.0588899	0.373596	0.314707	197	0.000271378	32.4823	91793.3	76496.5	-0.263004	0.033771	FALSE	TRUE	Downregulated
chrX:110924579-110925197	ALG13	0.0062771	0.337938	0.331661	58	0.000271378	14.8677	3631.77	4030.15	0.150482	0.284344	TRUE	FALSE	NoDiff.
chr11:71524420-71524713	ALG1L9P	0.0144251	0.228139	0.213714	25	0.0181045	8.34575	93.7046	139.028	0.566441	0.0241569	FALSE	FALSE	Upregulated
chr17:18085603-18086267	ALKBH5	0.0853939	0.337159	0.251765	22	0.00272278	11.167	4320.09	6949.21	0.685503	3.91893e-15	FALSE	FALSE	Upregulated
chr2:73612859-73613765	ALMS1	0.00215576	0.50542	0.508792	75	0.000271378	16.9576	4037.45	1401.76	-1.52608	1.95813e-45	FALSE	TRUE	Downregulated
chr17:6915979-6917545	ALOX12-AS1	0.158572	0.394775	0.236204	62	0.00320424	10.8486	301.43	347.337	0.204747	0.147852	FALSE	FALSE	NoDiff.
chr17:8021107-8022064	ALOXE3	0.0674224	0.338263	0.27084	43	0.00904836	9.19152	105.344	499.82	2.24479	1.08107e-55	TRUE	FALSE	Upregulated
chr4:113218524-113219399	ALPK1	0.146247	0.67421	0.527963	6	0.00770788	9.6189	768.952	598.958	-0.359297	0.156666	TRUE	TRUE	NoDiff.
chr2:202646566-202646839	ALS2	0.0908805	0.301457	0.210576	9	0.0441807	7.21702	1997.65	4852.21	1.27979	7.70069e-39	TRUE	FALSE	Upregulated
chr3:46734254-46735456	ALS2CL	0.0879256	0.362951	0.27307	85	0.00220229	11.8952	740.116	1384.74	0.902975	6.14301e-17	TRUE	TRUE	Upregulated
chr17:79849735-79850245	ALYREF	0.00151057	0.217869	0.216358	45	0.00177479	12.5419	5062.8	3973.69	-0.349726	0.020866	FALSE	FALSE	Downregulated
chr6:111135365-111136677	AMD1	0.00475901	0.352213	0.347454	140	0.000271378	17.8775	4738.94	4573.14	-0.0516822	0.741037	FALSE	FALSE	NoDiff.
chr16:56458083-56459926	AMFR	0.0299674	0.358632	0.329368	164	0.000271378	16.4053	4225.11	1776.44	-1.24982	1.58924e-17	TRUE	TRUE	Downregulated
chr1:110051590-110052825	AMIGO1	0.0475128	0.351291	0.303779	104	0.000271378	18.1403	425.302	213.842	-0.993669	4.20021e-10	TRUE	TRUE	Downregulated
chr12:47473657-47474891	AMIGO2	0.0206924	0.460079	0.446953	83	0.000791136	13.2868	6071.31	3213.97	-0.91738	4.41692e-13	TRUE	FALSE	Downregulated
chrX:109559651-109561859	AMMECR1	0.0185469	0.374593	0.355494	128	0.000271378	24.5764	3168.42	2742.85	-0.207933	0.0738672	FALSE	FALSE	NoDiff.
chr2:128641948-128643535	AMMECR1L	0.0734467	0.461698	0.399571	100	0.000271378	14.9876	4021.73	3867.23	-0.0564517	0.597945	FALSE	TRUE	NoDiff.
chrX:112083653-112084448	AMOT	0.010259	0.487817	0.477558	57	0.000271378	15.3562	1883.82	570.623	-1.722	1.86913e-28	TRUE	TRUE	Downregulated
chr11:94500901-94501879	AMOTL1	0.0106103	0.304036	0.296157	64	0.00272278	11.1953	5116.37	1706.59	-1.58374	2.12518e-13	TRUE	FALSE	Downregulated
chr3:134092812-134094235	AMOTL2	0.00707469	0.436086	0.42802	116	0.000271378	26.9097	6100.07	3538.48	-0.785471	2.80301e-09	TRUE	TRUE	Downregulated
chr1:110163158-110163985	AMPD2	0.0171279	0.429703	0.412575	29	0.000271378	24.2657	2591.88	2770.86	0.0958089	0.55696	FALSE	TRUE	NoDiff.
chr7:2727543-2729313	AMZ1	0.0460238	0.448527	0.402503	125	0.000271378	17.0117	1310.95	554.996	-1.24018	2.51926e-16	TRUE	TRUE	Downregulated
chr17:62971176-62971693	AMZ2P1	0.0356244	0.407015	0.37139	32	0.000791136	13.6248	1112.44	1227.36	0.142868	0.266657	TRUE	TRUE	NoDiff.
chr17:79849735-79850245	ANAPC11	0.00151057	0.217869	0.216358	45	0.00177479	12.5419	4319.57	3497.72	-0.304594	0.00109706	FALSE	FALSE	Downregulated
chr10:73975408-73975924	ANAPC16	0.0115507	0.335502	0.323951	43	0.000271378	16.2664	6104.97	3951.64	-0.627333	2.66371e-10	FALSE	FALSE	Downregulated
chr9:140081972-140084076	ANAPC2	0.0597551	0.343752	0.283997	168	0.000271378	17.7241	3411.7	2069.69	-0.721337	8.85381e-15	FALSE	FALSE	Downregulated
chr12:121790395-121790765	ANAPC5	0.00917431	0.219907	0.210732	16	0.0402381	7.34043	9064.31	10300.9	0.184529	0.00583983	FALSE	FALSE	Upregulated
chr14:21152498-21153191	ANG	0.00871051	0.341587	0.332876	40	0.00635215	9.88094	20.7864	53.8123	1.38031	0.00602275	FALSE	TRUE	Upregulated
chr14:77277554-77279093	ANGEL1	0.0833083	0.344799	0.261491	62	0.00518925	10.2125	3829.97	3376.68	-0.181692	0.0316852	FALSE	FALSE	Downregulated
chr19:8426897-8427621	ANGPTL4	0.242222	0.459435	0.217213	10	0.0810218	6.40823	90.0802	145.342	0.686527	0.0171539	TRUE	FALSE	Upregulated
chr10:61900539-61901370	ANK3	0.168105	0.482715	0.31461	10	0.0360498	7.49195	3860.05	4227.39	0.13143	0.458702	FALSE	FALSE	NoDiff.
chr10:62492535-62493409	ANK3	0.0231509	0.495823	0.472672	78	0.000271378	16.0869	3860.05	4227.39	0.13143	0.458702	FALSE	FALSE	NoDiff.
chr15:65203698-65204159	ANKDD1A	0.0921392	0.474225	0.382086	48	0.00518925	10.2445	376.878	427.171	0.181783	0.227942	FALSE	FALSE	NoDiff.
chr20:10015252-10015783	ANKEF1	0.104776	0.48913	0.384947	47	0.000959715	13.0702	1244.13	551.997	-1.17292	6.1475e-21	FALSE	FALSE	Downregulated
chr5:14870783-14872571	ANKH	0.128943	0.430352	0.301601	174	0.000271378	16.2381	899.1	1072.63	0.255177	0.079962	TRUE	FALSE	NoDiff.
chr7:91874782-91876482	ANKIB1	0.00534214	0.337135	0.331793	109	0.000271378	23.8813	7155.4	5977.27	-0.259533	0.00483446	FALSE	FALSE	Downregulated
chr12:133338762-133339115	ANKLE2	0.00326797	0.244956	0.241688	43	0.000791136	13.6517	4667.46	3281.99	-0.508469	1.26686e-09	FALSE	FALSE	Downregulated
chr7:16684422-16685352	ANKMY2	0.00607598	0.280759	0.274683	55	0.000271378	15.2926	922.044	2353.25	1.3529	6.88859e-25	FALSE	FALSE	Upregulated
chr18:9136950-9137651	ANKRD12	0.00809821	0.214988	0.220653	104	0.0165459	8.43958	2396.96	2549.09	0.0891015	0.558447	FALSE	FALSE	NoDiff.
chr17:27918580-27920901	ANKRD13B	0.0819019	0.434531	0.351383	176	0.000668406	14.2557	342.612	145.153	-1.23834	3.28047e-10	FALSE	TRUE	Downregulated
chr1:70819074-70820247	ANKRD13C	0.00419702	0.31665	0.312453	56	0.000668406	14.0957	1164.82	1313.61	0.173356	0.17628	FALSE	FALSE	NoDiff.
chr11:67055633-67057669	ANKRD13D	0.0822283	0.409431	0.32916	175	0.000668406	14.2137	2317.3	1360.26	-0.768809	1.3681e-21	FALSE	TRUE	Downregulated
chr10:5932552-5932961	ANKRD16	0.0170166	0.233351	0.216335	22	0.0160694	8.49583	509.619	359.746	-0.504765	0.000589792	FALSE	FALSE	Downregulated
chr4:74123063-74125005	ANKRD17	0.00821096	0.375645	0.367434	131	0.000271378	18.1247	6590.08	7303.55	0.148287	0.0690186	FALSE	TRUE	NoDiff.
chr9:33524189-33524563	ANKRD18B	0	0.273759	0.280244	29	0.00479912	10.2938	539.901	816.117	0.597816	0.000119808	FALSE	FALSE	Upregulated
chr19:4181850-4182442	ANKRD24	0.10055	0.306331	0.205781	26	0.00816356	9.5228	196.988	479.375	1.28473	7.19153e-07	FALSE	FALSE	Upregulated
chr10:27388506-27390269	ANKRD26	0.0409687	0.255339	0.214371	91	0.00191034	12.4882	1620.53	820.812	-0.980204	3.07579e-15	FALSE	FALSE	Downregulated
chr3:15900891-15902480	ANKRD28	0.0115912	0.3785	0.366825	144	0.000271378	23.1644	5568.48	3027.28	-0.879099	5.74149e-17	FALSE	FALSE	Downregulated
chr1:145470439-145471190	ANKRD34A	0.130899	0.437591	0.306692	22	0.0361367	7.47408	528.027	245.043	-1.10584	5.66121e-16	TRUE	FALSE	Downregulated
chr5:79865783-79866154	ANKRD34B	0.0324224	0.272174	0.239752	38	0.0639662	6.7401	343.268	550.446	0.679914	0.00175426	TRUE	FALSE	Upregulated
chr1:145548549-145549009	ANKRD35	0.095778	0.345039	0.249261	23	0.0685166	6.65079	61.4848	137.165	1.16018	2.54146e-05	TRUE	FALSE	Upregulated
chr2:97779255-97779843	ANKRD36	0.00159236	0.295001	0.293409	38	0.000791136	13.542	2246.83	3394.91	0.59602	0.000600158	FALSE	FALSE	Upregulated
chr2:97522656-97523583	ANKRD39	0.156509	0.430458	0.27395	41	0.000500314	14.4431	1453.57	1834.71	0.335403	0.0130095	FALSE	FALSE	Upregulated
chr17:48784613-48786231	ANKRD40	0.0115842	0.279403	0.267819	82	0.000271378	18.7482	4828.33	3347.3	-0.528645	1.29084e-09	TRUE	TRUE	Downregulated
chr2:198175019-198176492	ANKRD44	0.0280817	0.397065	0.368983	128	0.000271378	19.0989	297.08	184.363	-0.687166	0.000917779	FALSE	FALSE	Downregulated
chr4:125632520-125634792	ANKRD50	0.00441573	0.28477	0.280354	135	0.000271378	19.4071	11206.8	5851.56	-0.937375	5.02621e-28	FALSE	TRUE	Downregulated
chr12:56650801-56653066	ANKRD52	0.162653	0.363637	0.200984	128	0.000500314	14.5179	12569	9805.06	-0.35837	0.00980824	FALSE	FALSE	Downregulated
chr6:90142575-90143166	ANKRD6	0.0159543	0.217361	0.201859	65	0.00453586	10.391	295.763	268.339	-0.139087	0.516454	TRUE	FALSE	NoDiff.
chr14:102976343-102976628	ANKRD9	0.0211905	0.242665	0.221474	31	0.0127076	8.7759	437.23	664.817	0.602387	0.00802044	TRUE	FALSE	Upregulated
chr6:34855223-34855672	ANKS1A	0.00585172	0.209072	0.203221	19	0.0165459	8.43998	2792.16	3329.58	0.253505	0.111463	TRUE	FALSE	NoDiff.
chr12:100377781-100379080	ANKS1B	0.0597127	0.408986	0.349273	113	0.000271378	19.8964	122.933	73.0492	-0.749789	0.00890978	FALSE	TRUE	Downregulated
chr9:101558389-101559069	ANKS6	0.0100979	0.229024	0.219886	109	0.00177479	12.5513	1628.61	2037.15	0.323062	0.00543272	FALSE	FALSE	Upregulated
chr3:43663091-43663483	ANO10	0.0131579	0.222248	0.209091	36	0.00800283	9.58241	1025.71	1322.23	0.367029	0.000162708	FALSE	FALSE	Upregulated
chr12:45609227-45610373	ANO6	0.00463952	0.442174	0.437535	101	0.000271378	22.6867	3125.9	1225.11	-1.3512	1.30409e-24	FALSE	TRUE	Downregulated
chr2:242127608-242128250	ANO7	0.315177	0.687104	0.371926	17	0.0337943	7.56583	179.864	138.713	-0.37145	0.0758028	TRUE	TRUE	NoDiff.
chr19:17445263-17446114	ANO8	0.00360232	0.294	0.294405	77	0.00191034	12.4016	1952.28	1236.89	-0.65858	6.57732e-15	FALSE	FALSE	Downregulated
chr11:441819-442149	ANO9	0.0181397	0.391334	0.373194	17	0.0145778	8.63171	2206.94	898.056	-1.29667	3.45084e-38	FALSE	FALSE	Downregulated
chrX:8699404-8700673	ANOS1	0.074978	0.318544	0.243566	120	0.00111136	12.7922	121.133	96.0448	-0.339945	0.344344	TRUE	FALSE	NoDiff.
chr9:100745105-100747329	ANP32B	0.00449853	0.413577	0.403066	276	0.000271378	22.1363	27131.5	3629.79	-2.9019	2.59749e-172	TRUE	TRUE	Downregulated
chr1:150206206-150207523	ANP32E	0.0447207	0.274043	0.229322	81	0.000271378	16.1563	11148.4	14224.5	0.351459	0.00064413	FALSE	FALSE	Upregulated
chr2:69239986-69240664	ANTXR1	0.119949	0.435269	0.31532	55	0.0181667	8.34234	1869.52	541.217	-1.7882	6.42084e-63	TRUE	FALSE	Downregulated
chr10:81963285-81964884	ANXA11	0.207158	0.510817	0.30366	41	0.00191034	12.502	3352.56	4134.45	0.301992	0.000733252	FALSE	FALSE	Upregulated
chr15:60689560-60690948	ANXA2	0.00449866	0.376764	0.397491	103	0.000791136	13.3173	13270.7	11365.2	-0.223679	0.0444744	TRUE	FALSE	Downregulated
chr4:79472390-79473632	ANXA3	0.113986	0.332498	0.218512	70	0.000959715	13	2647.16	4321.39	0.707393	0.000312193	FALSE	FALSE	Upregulated
chr2:69968602-69969765	ANXA4	0.00595939	0.249529	0.24357	91	0.000271378	21.4737	4062.46	4782.26	0.2357	0.0148879	FALSE	FALSE	Upregulated
chr4:122617002-122618608	ANXA5	0.0109947	0.295064	0.28958	125	0.000271378	18.2254	10173.8	7563	-0.427849	5.43901e-06	TRUE	FALSE	Downregulated
chr5:150537041-150538165	ANXA6	0.0359647	0.322972	0.287007	60	0.000959715	12.9541	4095.93	5119.53	0.322074	0.158802	TRUE	FALSE	NoDiff.
chr16:71841738-71843647	AP1G1	0.0116832	0.213958	0.202275	104	0.000271378	25.7016	13161.4	12586.5	-0.064466	0.498089	FALSE	TRUE	NoDiff.
chr14:24036050-24039378	AP1G2	0.170448	0.396888	0.226439	73	0.000668406	13.9703	6550.41	9810.8	0.582862	2.2598e-12	FALSE	TRUE	Upregulated
chr7:100797628-100798646	AP1S1	0.0139326	0.395315	0.390451	75	0.000271378	20.5405	8508.39	5182.5	-0.71538	1.75601e-08	FALSE	TRUE	Downregulated
chrX:15873476-15874005	AP1S2	0.0154198	0.2841	0.26868	25	0.00280792	10.9503	942.23	803.31	-0.229772	0.0748643	FALSE	FALSE	NoDiff.
chr2:224701559-224703188	AP1S3	0.0700684	0.532579	0.494493	127	0.000271378	18.7536	707.544	286.327	-1.30721	1.85533e-15	TRUE	TRUE	Downregulated
chr17:33914413-33915398	AP2B1	0.028091	0.32096	0.292869	39	0.0184623	8.31427	9112.8	6582.49	-0.469196	1.04464e-08	TRUE	FALSE	Downregulated
chr19:47352922-47353761	AP2S1	0.132274	0.568403	0.436129	17	0.000791136	13.4156	4074.09	3010.25	-0.43685	0.00395575	FALSE	TRUE	Downregulated
chr5:77590113-77590574	AP3B1	0.0031348	0.222417	0.219282	35	0.00272278	11.0502	4449.21	5274.62	0.245644	0.00859903	FALSE	FALSE	Upregulated
chr15:83378356-83379008	AP3B2	0.00290305	0.26028	0.257377	70	0.000271378	18.7577	213.38	306.193	0.521735	0.00960355	FALSE	FALSE	Upregulated
chr5:115176426-115177154	AP3S1	0.0092889	0.273939	0.26465	15	0.0130323	8.75231	3613.31	3506.77	-0.0430137	0.670074	FALSE	FALSE	NoDiff.
chr14:31494527-31496451	AP4S1	0.00353871	0.245153	0.241614	133	0.000271378	22.2168	1199.12	1642.34	0.454977	0.000516574	FALSE	TRUE	Upregulated
chr11:65548070-65548603	AP5B1	0.00551876	0.265358	0.259877	81	0.00453586	10.4064	2188.29	1995.47	-0.133609	0.319362	TRUE	FALSE	NoDiff.
chr14:57735107-57735520	AP5M1	0.0111331	0.345854	0.334721	38	0.000271378	21.4052	1997.09	3149.93	0.657617	2.70965e-15	FALSE	TRUE	Upregulated
chr12:99037948-99038555	APAF1	0.00974733	0.255065	0.245317	37	0.000668406	14.2033	1440.45	4943.5	1.77955	2.60549e-73	FALSE	FALSE	Upregulated
chr9:72287601-72287989	APBA1	0	0.218665	0.220643	32	0.0148523	8.59996	148.958	326.86	1.13625	2.12825e-12	TRUE	FALSE	Upregulated
chr4:41215602-41217270	APBB2	0.0115901	0.291181	0.279591	120	0.000271378	18.9786	6163.76	5514.58	-0.160462	0.271868	TRUE	FALSE	NoDiff.
chr5:139944023-139944676	APBB3	0.00410381	0.266674	0.26257	58	0.000271378	17.085	1375.53	1145.34	-0.263288	0.0449584	TRUE	FALSE	Downregulated
chr18:10454615-10455411	APCDD1	0.0528732	0.441949	0.402065	98	0.000271378	18.8805	55.4178	24.436	-1.18201	0.00654941	TRUE	TRUE	Downregulated
chr15:63569930-63570336	APH1B	0.00362319	0.205518	0.201895	29	0.0136114	8.71249	1252.67	2542.78	1.02233	2.00407e-24	TRUE	FALSE	Upregulated
chr19:36359211-36360454	APLP1	0.0477894	0.317961	0.275022	93	0.00330477	10.6972	362.054	331.877	-0.126799	0.575934	FALSE	FALSE	NoDiff.
chr11:129938910-129939492	APLP2	0.0398316	0.354	0.299193	43	0.0099921	9.04279	17047.1	18487.1	0.116919	0.2152	TRUE	FALSE	NoDiff.
chr22:39377247-39378731	APOBEC3B	0.265368	0.559458	0.301249	28	0.00635215	9.89029	550.277	289.662	-0.927055	9.14436e-07	TRUE	FALSE	Downregulated
chr19:45406999-45407231	APOE	0.149762	0.396859	0.247097	13	0.019526	8.25758	78.8413	151.471	0.944567	0.00083116	FALSE	FALSE	Upregulated
chr19:45408779-45409800	APOE	0.251462	0.56612	0.314658	33	0.0134747	8.72762	78.8413	151.471	0.944567	0.00083116	FALSE	TRUE	Upregulated
chr12:12876216-12879473	APOLD1	0.00978192	0.247531	0.237749	261	0.000271378	24.4782	485.53	227.087	-1.09414	8.5123e-08	TRUE	FALSE	Downregulated
chr6:31619544-31619832	APOM	0.00438596	0.215883	0.211497	10	0.0688397	6.6449	88.2388	336.291	1.93417	1.10518e-18	FALSE	FALSE	Upregulated
chr14:104027756-104028711	APOPT1	0.00703387	0.339095	0.332061	56	0.000271378	16.3844	2454.56	2674.24	0.123896	0.242835	FALSE	FALSE	NoDiff.
chr17:58601855-58603715	APPBP2	0.0316481	0.420727	0.389079	81	0.000271378	20.693	54538.9	26590.9	-1.03635	3.59391e-40	FALSE	TRUE	Downregulated
chr12:105629388-105629942	APPL2	0	0.2247	0.2247	54	0.000271378	16.9446	2666.82	2055.99	-0.374822	0.0054587	FALSE	FALSE	Downregulated
chr16:88878482-88879290	APRT	0.0287667	0.34115	0.312384	62	0.000271378	19.8367	9343.93	9634.94	0.0441577	0.680676	FALSE	FALSE	NoDiff.
chr7:77325944-77326842	APTR	0.00332259	0.394341	0.391019	69	0.000271378	22.7153	484.511	715.005	0.562126	0.00307947	FALSE	TRUE	Upregulated
chr11:77300398-77301611	AQP11	0.0063978	0.300282	0.292885	112	0.000271378	18.0476	243.748	142.007	-0.779079	0.0001197	TRUE	FALSE	Downregulated
chrX:66763359-66766593	AR	0.0436454	0.446185	0.405095	176	0.000271378	16.8394	7416	4312.67	-0.781823	3.95599e-11	FALSE	TRUE	Downregulated
chr11:72462376-72463983	ARAP1	0.0559642	0.320632	0.264668	68	0.000668406	13.9296	3399.54	2457.27	-0.46843	5.07601e-05	TRUE	FALSE	Downregulated
chr4:36245368-36246442	ARAP2	0.00655184	0.263085	0.25477	109	0.000271378	15.0801	597.838	459.543	-0.379601	0.0266808	TRUE	FALSE	Downregulated
chr8:143695554-143697105	ARC	0.0305725	0.511779	0.484639	93	0.000271378	30.5956	52.2028	16.6601	-1.64445	0.000328287	FALSE	TRUE	Downregulated
chr1:228270707-228271148	ARF1	0.00146199	0.201824	0.200362	46	0.00833757	9.39034	16614.5	26694.9	0.684058	8.16216e-11	FALSE	FALSE	Upregulated
chr14:50359182-50359448	ARF6	0.00205339	0.206061	0.204007	16	0.00878586	9.25156	13754.4	13132.3	-0.0667219	0.66034	TRUE	FALSE	NoDiff.
chr20:61903250-61905426	ARFGAP1	0.0882556	0.310802	0.222546	158	0.000271378	17.0444	6887.84	10706	0.63637	1.06886e-16	FALSE	TRUE	Upregulated
chr11:47198856-47199248	ARFGAP2	0.0184049	0.220321	0.201916	11	0.00280792	10.9844	8174.87	11474.9	0.489072	3.4953e-10	FALSE	FALSE	Upregulated
chr8:68254757-68256248	ARFGEF1	0.00419615	0.404392	0.400196	134	0.000271378	17.8564	5033.76	1681.91	-1.58115	3.82527e-29	FALSE	TRUE	Downregulated
chr20:47537583-47538882	ARFGEF2	0.0188035	0.395484	0.37668	103	0.000271378	15.0096	8048.34	7252.47	-0.150071	0.182972	FALSE	TRUE	NoDiff.
chr6:138482666-138484101	ARFGEF3	0.00786057	0.277027	0.27255	138	0.000271378	16.6593	6301.22	7710.26	0.291127	0.000878096	FALSE	FALSE	Upregulated
chr4:153700012-153702348	ARFIP1	0.0162923	0.385405	0.369113	105	0.000271378	24.1232	2593.63	2337.61	-0.14962	0.28544	FALSE	TRUE	NoDiff.
chr20:62338235-62339154	ARFRP1	0.0341365	0.277757	0.248642	81	0.000271378	15.8052	1583.62	1493.11	-0.0843378	0.434489	FALSE	FALSE	NoDiff.
chr14:68086530-68087339	ARG2	0.0359465	0.474181	0.438234	52	0.000271378	19.777	984.809	1207.74	0.295533	0.00997038	FALSE	FALSE	Upregulated
chr11:46721702-46722036	ARHGAP1	0.00217391	0.320414	0.31824	12	0.00635215	9.90937	6682.51	7823.67	0.227325	0.0073118	FALSE	FALSE	Upregulated
chr4:148652607-148653191	ARHGAP10	0.0257219	0.355925	0.330203	46	0.000271378	20.3341	1371.64	1315.21	-0.0601898	0.533118	FALSE	FALSE	NoDiff.
chr15:32907698-32908017	ARHGAP11A	0.00613952	0.278332	0.272192	23	0.00340365	10.6791	7873.5	3689.73	-1.09356	3.49371e-17	TRUE	FALSE	Downregulated
chr10:32216717-32217776	ARHGAP12	0.002574	0.306608	0.303464	108	0.000271378	19.1817	3884.96	4396.82	0.178741	0.120062	TRUE	FALSE	NoDiff.
chr6:130030793-130031620	ARHGAP18	0.00465875	0.375456	0.370797	24	0.000271378	15.5578	782.139	651.042	-0.263664	0.0410002	TRUE	FALSE	Downregulated
chr10:25011250-25014201	ARHGAP21	0.037797	0.534407	0.49591	265	0.000271378	32.277	3101.18	708.14	-2.13121	2.70248e-95	TRUE	TRUE	Downregulated
chr10:49863317-49864839	ARHGAP22	0.023413	0.464844	0.452136	102	0.000271378	20.7509	14.6456	75.9562	2.35802	6.16261e-10	FALSE	TRUE	Upregulated
chr17:36584356-36584524	ARHGAP23	0.00862069	0.381559	0.372938	10	0.00861879	9.32986	2.62399	95.46	5.20461	1.45075e-21	FALSE	FALSE	Upregulated
chr4:86396080-86396802	ARHGAP24	0.0204461	0.307814	0.287367	37	0.00238362	11.7812	251.645	232.292	-0.113414	0.552786	TRUE	FALSE	NoDiff.
chr4:86747242-86747659	ARHGAP24	0.242026	0.524746	0.28272	6	0.0864303	6.33216	251.645	232.292	-0.113414	0.552786	TRUE	FALSE	NoDiff.
chr17:43508291-43510681	ARHGAP27	0.0453516	0.393601	0.341565	170	0.000271378	18.6114	1006.09	2649.88	1.39615	1.05617e-52	TRUE	TRUE	Upregulated
chr3:119012684-119013152	ARHGAP31	0.00744388	0.397291	0.389847	30	0.00111136	12.9287	105.223	578.042	2.46345	5.29928e-47	FALSE	FALSE	Upregulated
chrX:153192906-153193648	ARHGAP4	0.0496219	0.442667	0.392843	43	0.000668406	13.9	835.028	1045.09	0.324857	0.00676309	FALSE	FALSE	Upregulated
chr11:100557832-100558246	ARHGAP42	0.012987	0.442208	0.429221	51	0.00797866	9.59501	142.83	26.1558	-2.45674	1.15002e-12	FALSE	TRUE	Downregulated
chr14:32545497-32546948	ARHGAP5	0.00704601	0.526353	0.52093	152	0.000271378	27.2458	3037.71	513.611	-2.56401	1.02349e-79	FALSE	TRUE	Downregulated
chr14:32545497-32546948	ARHGAP5-AS1	0.00704601	0.526353	0.52093	152	0.000271378	27.2458	81.0289	9.74779	-3.05353	8.33174e-18	TRUE	TRUE	Downregulated
chr22:45148591-45149795	ARHGAP8	0.03979	0.404987	0.370911	59	0.00220229	12.0813	283.81	245.294	-0.211354	0.29456	FALSE	FALSE	NoDiff.
chr17:79828051-79828857	ARHGDIA	0.0412815	0.271839	0.230557	65	0.00320424	10.8158	13099.6	12228.3	-0.099395	0.543402	FALSE	FALSE	NoDiff.
chr16:330087-330594	ARHGDIG	0.0658797	0.306061	0.261786	63	0.00974231	9.05951	217.059	311.355	0.520966	0.000504998	FALSE	FALSE	Upregulated
chr19:42387014-42388290	ARHGEF1	0.0178697	0.387048	0.367935	110	0.000271378	18.8127	2580.58	1690.67	-0.610557	2.12441e-06	FALSE	FALSE	Downregulated
chr8:1771267-1772807	ARHGEF10	0.0189141	0.282046	0.262391	147	0.00272278	11.1153	1727.85	3118.17	0.851591	5.3555e-22	TRUE	TRUE	Upregulated
chr1:157014338-157016322	ARHGEF11	0.04424	0.384012	0.338036	152	0.000271378	25.1428	4843.47	1178.98	-2.03816	1.53248e-77	TRUE	FALSE	Downregulated
chr11:120207603-120208360	ARHGEF12	0.00168919	0.262825	0.261136	32	0.00111136	12.7915	8326.79	9583.63	0.202911	0.0510085	FALSE	FALSE	NoDiff.
chr1:3370758-3371811	ARHGEF16	0.0127857	0.403598	0.38041	110	0.024061	7.97528	1084.67	779.193	-0.477946	0.000426541	FALSE	TRUE	Downregulated
chr11:73019278-73020925	ARHGEF17	0.307377	0.585315	0.277938	165	0.0026137	11.403	3026.45	1657.52	-0.868231	1.46515e-20	FALSE	TRUE	Downregulated
chr1:16538747-16539341	ARHGEF19	0.0701896	0.459378	0.389189	13	0.056269	6.90236	1500.98	918.315	-0.709077	8.94823e-07	TRUE	FALSE	Downregulated
chr1:155947525-155949062	ARHGEF2	0.0439952	0.521072	0.477076	110	0.000271378	24.7181	1907.09	1026	-0.893881	7.4099e-09	TRUE	TRUE	Downregulated
chr12:58005046-58005758	ARHGEF25	0.0711369	0.366788	0.294812	61	0.0147213	8.61822	495.951	81.3937	-2.60836	2.85238e-38	FALSE	TRUE	Downregulated
chr3:153840214-153841487	ARHGEF26-AS1	0.229617	0.558611	0.328994	43	0.000959715	12.9633	23.9079	177.221	2.88217	1.07286e-18	FALSE	TRUE	Upregulated
chr5:72921573-72922177	ARHGEF28	0	0.345282	0.345282	75	0.000271378	18.1497	851.914	501.946	-0.762491	0.000120592	TRUE	FALSE	Downregulated
chr3:57112442-57113679	ARHGEF3	0.0107692	0.319992	0.306191	118	0.00861879	9.32188	257.139	646.61	1.32997	9.89896e-12	FALSE	FALSE	Upregulated
chr5:148961002-148961311	ARHGEF37	0.0813083	0.397446	0.316137	36	0.0057678	10.1328	231.641	121.504	-0.928831	0.000107589	FALSE	FALSE	Downregulated
chr14:21536678-21539358	ARHGEF40	0.202736	0.476223	0.271474	170	0.000271378	15.3702	292.637	118.618	-1.30449	1.52911e-16	FALSE	TRUE	Downregulated
chrX:62974606-62975487	ARHGEF9	0.108417	0.449533	0.341115	51	0.010666	8.94299	2288.48	1493.08	-0.616318	1.14885e-10	FALSE	FALSE	Downregulated
chr1:27022035-27024609	ARID1A	0.00341097	0.355529	0.346988	267	0.000271378	22.7017	7730.97	2833.19	-1.44835	3.56736e-48	FALSE	TRUE	Downregulated
chr6:157098191-157101212	ARID1B	0.00885478	0.288456	0.283902	377	0.000668406	13.9681	2768.18	1920.21	-0.527609	6.12537e-12	FALSE	FALSE	Downregulated
chr12:46121264-46121883	ARID2	0.00516529	0.242239	0.237073	40	0.00272278	11.0467	4648.76	864.094	-2.42743	1.64065e-71	TRUE	FALSE	Downregulated
chr19:924635-927924	ARID3A	0.0387794	0.426316	0.390642	256	0.000271378	21.0081	1409.24	605.546	-1.21911	1.45431e-18	FALSE	TRUE	Downregulated
chr15:74833496-74834300	ARID3B	0.00706162	0.313352	0.306291	61	0.000791136	13.2077	741.221	690.151	-0.104368	0.560072	FALSE	TRUE	NoDiff.
chr14:58764147-58764743	ARID4A	0.00414959	0.284625	0.280475	27	0.000271378	20.8541	4075.57	2156.17	-0.918411	7.29958e-13	FALSE	FALSE	Downregulated
chr1:235490190-235492487	ARID4B	0.00164474	0.429232	0.427587	183	0.000271378	29.4497	3888.43	1357.66	-1.51778	6.82539e-37	FALSE	TRUE	Downregulated
chr2:97202603-97203335	ARID5A	0.0452855	0.317841	0.272556	71	0.00191034	12.3956	141.823	104.9	-0.437393	0.174891	FALSE	FALSE	NoDiff.
chr10:63659675-63660464	ARID5B	0.00751738	0.423821	0.416304	21	0.00220229	12.1387	2045.92	1453.07	-0.493217	0.00280662	FALSE	TRUE	Downregulated
chr10:63808852-63809248	ARID5B	0.0236305	0.327629	0.303999	16	0.0301094	7.71784	2045.92	1453.07	-0.493217	0.00280662	FALSE	FALSE	Downregulated
chr15:72766676-72768008	ARIH1	0.00472907	0.371847	0.367118	125	0.000271378	23.0091	5462.37	4583.08	-0.253134	0.00140855	FALSE	FALSE	Downregulated
chr3:93699097-93699432	ARL13B	0.00560842	0.23617	0.230561	28	0.0227192	8.05884	858.766	846.328	-0.0218418	0.856185	FALSE	FALSE	NoDiff.
chr11:30344573-30345148	ARL14EP	0.00603224	0.281841	0.275809	38	0.000500314	14.6574	997.196	570.431	-0.805396	2.14897e-06	TRUE	TRUE	Downregulated
chr5:53606639-53607123	ARL15	0.0097873	0.232218	0.22243	30	0.00177479	12.5904	1254.62	2245.67	0.840597	2.67895e-10	TRUE	FALSE	Upregulated
chr11:64781084-64782488	ARL2	0.0301011	0.306751	0.27665	127	0.000271378	19.7265	528.15	513.376	-0.0417874	0.868314	FALSE	FALSE	NoDiff.
chr10:104473442-104475428	ARL3	0.0244026	0.294807	0.270405	120	0.000271378	17.8039	3656.05	2761.37	-0.404641	0.000279903	TRUE	TRUE	Downregulated
chr2:152683999-152684955	ARL5A	0.00885092	0.233372	0.232146	74	0.000271378	15.2639	1690.05	1418.43	-0.253361	0.0430501	FALSE	TRUE	Downregulated
chr12:123464441-123466396	ARL6IP4	0.089565	0.392193	0.308706	154	0.000271378	18.6389	4760.24	2952.27	-0.689381	8.1141e-12	FALSE	TRUE	Downregulated
chr2:153573494-153574977	ARL6IP6	0.00280616	0.393174	0.390486	116	0.000271378	26.0569	1779.06	1491.73	-0.254248	0.00658134	TRUE	TRUE	Downregulated
chr1:202112358-202114274	ARL8A	0.0503517	0.363191	0.312839	156	0.000271378	19.9615	1894.56	1122.03	-0.756466	8.01281e-15	FALSE	TRUE	Downregulated
chr7:102714326-102715442	ARMC10	0.0378678	0.443157	0.40529	50	0.000271378	18.7748	3100.02	2149.77	-0.528195	2.16229e-09	FALSE	TRUE	Downregulated
chr6:109169595-109170102	ARMC2	0	0.289692	0.289692	48	0.0414035	7.29567	125.868	155.181	0.304858	0.208736	FALSE	TRUE	NoDiff.
chr19:19143718-19144127	ARMC6	0.00211864	0.213066	0.210947	35	0.00340365	10.6647	1726.06	1130.25	-0.611716	9.50796e-09	TRUE	TRUE	Downregulated
chrX:100805271-100806397	ARMCX1	0.0115931	0.31687	0.305277	50	0.00220229	12.1632	2294.07	331.47	-2.79005	1.28082e-46	TRUE	FALSE	Downregulated
chrX:100740119-100740600	ARMCX4	0.0689334	0.401676	0.332788	38	0.0296967	7.73718	361.073	135.146	-1.41455	1.23302e-16	FALSE	FALSE	Downregulated
chrX:100872083-100872885	ARMCX6	0.0286104	0.429632	0.401022	31	0.000271378	18.4232	6401.28	3041.77	-1.07319	6.72649e-17	TRUE	FALSE	Downregulated
chr6:151770797-151772139	ARMT1	0.0322361	0.495665	0.465718	78	0.000271378	16.1152	17892.1	9652.62	-0.89026	1.83565e-44	FALSE	TRUE	Downregulated
chr15:80696222-80697454	ARNT2	0.00878606	0.406136	0.39735	144	0.000271378	25.0314	1438.37	389.096	-1.88748	2.05174e-43	FALSE	TRUE	Downregulated
chr12:27485390-27486675	ARNTL2	0.0418309	0.273257	0.225564	138	0.000271378	15.5372	663.558	459.088	-0.533259	0.00883662	TRUE	FALSE	Downregulated
chr7:98972358-98973273	ARPC1B	0.00808498	0.375602	0.3618	84	0.000500314	14.7518	13019.7	18133.4	0.477869	0.0047762	FALSE	TRUE	Upregulated
chr2:219081943-219082723	ARPC2	0.00723519	0.449592	0.444938	50	0.000271378	16.1166	10423.5	10369.1	-0.00767866	0.963381	TRUE	TRUE	NoDiff.
chr1:183604107-183604898	ARPC5	0.00228574	0.326474	0.324188	57	0.000271378	16.2719	10487.8	9406.54	-0.157082	0.2238	TRUE	TRUE	NoDiff.
chr9:127631592-127632869	ARPC5L	0.0291589	0.382375	0.353216	76	0.000271378	19.2226	3804.08	3816.15	0.00424008	0.984426	FALSE	FALSE	NoDiff.
chr11:75062390-75063090	ARRB1	0.00891011	0.31778	0.310213	89	0.000791136	13.5241	3577.69	2056.26	-0.799086	1.01288e-07	FALSE	FALSE	Downregulated
chr17:4613010-4614180	ARRB2	0.00656704	0.475203	0.468636	96	0.000271378	25.9892	1955.54	1034	-0.919951	9.783e-12	TRUE	TRUE	Downregulated
chr9:140499464-140500434	ARRDC1	0.00368558	0.280852	0.274977	121	0.00191034	12.487	5667.4	8268.29	0.544781	3.41005e-09	FALSE	TRUE	Upregulated
chr9:140512464-140512931	ARRDC1-AS1	0.02861	0.301229	0.272619	21	0.00969814	9.09169	942.514	792.688	-0.24962	0.0250367	FALSE	FALSE	Downregulated
chr9:140513678-140514393	ARRDC1-AS1	0.00841291	0.230485	0.222072	60	0.000271378	16.8923	942.514	792.688	-0.24962	0.0250367	FALSE	FALSE	Downregulated
chr19:18111359-18111892	ARRDC2	0.160664	0.479159	0.318495	29	0.00238362	11.7635	1080.33	714.42	-0.598024	2.83569e-07	FALSE	FALSE	Downregulated
chr19:18117587-18118063	ARRDC2	0.15016	0.445608	0.295448	26	0.00320424	10.8386	1080.33	714.42	-0.598024	2.83569e-07	FALSE	FALSE	Downregulated
chr5:90679194-90679554	ARRDC3	0.00548181	0.333731	0.328249	32	0.00635215	9.86136	3149.53	2383.35	-0.402186	0.0293361	TRUE	FALSE	Downregulated
chr5:78280482-78281938	ARSB	0.021616	0.261308	0.237019	130	0.00177479	12.6276	390.92	565.897	0.531889	0.000718693	TRUE	FALSE	Upregulated
chrX:2846352-2847503	ARSD	0.0320866	0.430993	0.392574	106	0.000271378	19.1904	6379.64	3057.59	-1.0608	9.20745e-20	FALSE	TRUE	Downregulated
chr17:66286484-66288531	ARSG	0.00189319	0.231329	0.229436	207	0.000271378	26.5539	1244.4	1320	0.0860322	0.665508	TRUE	TRUE	NoDiff.
chr4:114900446-114901274	ARSJ	0.0444495	0.546202	0.501752	52	0.000500314	14.3814	100.597	16.0186	-2.64272	3.69404e-12	TRUE	TRUE	Downregulated
chr1:231113709-231114006	ARV1	0.0034965	0.221645	0.218149	20	0.0121283	8.8141	917.958	1047.61	0.190715	0.180662	TRUE	FALSE	NoDiff.
chr8:131455440-131456330	ASAP1	0.015906	0.498414	0.482508	119	0.000271378	24.5561	2707.67	2208.44	-0.294275	0.0097594	FALSE	TRUE	Downregulated
chr1:23810989-23811274	ASAP3	0.010989	0.277851	0.266862	17	0.010418	8.9563	832.669	710.167	-0.228729	0.0676976	TRUE	FALSE	NoDiff.
chr17:42245818-42246266	ASB16	0.122727	0.465002	0.342275	9	0.0218313	8.09383	546.693	724.592	0.405999	0.00183843	FALSE	FALSE	Upregulated
chr2:54014095-54014988	ASB3	0.00525585	0.387939	0.382683	61	0.000271378	20.1354	336.31	294.842	-0.188379	0.26403	FALSE	TRUE	NoDiff.
chrX:15287903-15288312	ASB9	0.0296859	0.44923	0.419544	11	0.00941507	9.14169	186.534	96.2455	-0.951037	0.000236684	FALSE	FALSE	Downregulated
chr10:73975408-73975924	ASCC1	0.0115507	0.335502	0.323951	43	0.000271378	16.2664	1764.93	1527.42	-0.208143	0.0501868	FALSE	FALSE	NoDiff.
chr6:101328854-101330288	ASCC3	0.0274377	0.24318	0.215742	83	0.000791136	13.2106	4284.5	4510.64	0.0741058	0.555057	FALSE	FALSE	NoDiff.
chr12:103350893-103352171	ASCL1	0.0196196	0.573494	0.553874	91	0.000271378	21.1056	2023.8	248.582	-3.02564	1.11163e-60	TRUE	TRUE	Downregulated
chr11:2289413-2293260	ASCL2	0.183505	0.449658	0.276884	365	0.000271378	15.7976	761.107	233.639	-1.70209	3.65159e-27	TRUE	FALSE	Downregulated
chr19:14246168-14247287	ASF1B	0.0204209	0.380004	0.360493	48	0.000500314	14.544	3743.93	1674.97	-1.16053	0.0014846	FALSE	TRUE	Downregulated
chr1:155531854-155533074	ASH1L	0.0105099	0.497757	0.488201	126	0.000271378	20.7292	10303.1	2634.37	-1.96738	1.73278e-87	TRUE	TRUE	Downregulated
chr1:155531854-155533074	ASH1L-AS1	0.0105099	0.497757	0.488201	126	0.000271378	20.7292	487.937	259.856	-0.909232	1.94546e-10	TRUE	TRUE	Downregulated
chr8:37962134-37962555	ASH2L	0.00537634	0.235804	0.230428	23	0.0084827	9.37212	2206.85	2238.09	0.0202981	0.846455	FALSE	FALSE	NoDiff.
chr12:50449503-50451730	ASIC1	0.0889235	0.334628	0.245704	121	0.000271378	18.9104	570.816	606.993	0.0866057	0.578369	FALSE	TRUE	NoDiff.
chr7:97500850-97501901	ASNS	0.0219204	0.353599	0.331678	78	0.000271378	22.6788	8016.18	3284.64	-1.28714	0.030546	TRUE	TRUE	Downregulated
chr8:62626122-62627289	ASPH	0.0552083	0.344608	0.2894	107	0.000500314	14.5999	1022.16	1164.19	0.188204	0.282234	TRUE	FALSE	NoDiff.
chr16:29910103-29912544	ASPHD1	0.0935614	0.495323	0.401762	131	0.000271378	20.6985	645.726	232.313	-1.47607	5.84554e-18	FALSE	TRUE	Downregulated
chr9:133319865-133320485	ASS1	0.0841776	0.52893	0.442453	61	0.0139966	8.66224	10216.3	10843	0.0859109	0.92604	TRUE	TRUE	NoDiff.
chr2:96803729-96804563	ASTL	0.154927	0.357834	0.202908	14	0.048257	7.10391	66.6671	91.42	0.44991	0.325913	TRUE	FALSE	NoDiff.
chr9:120175665-120177543	ASTN2	0.110868	0.415601	0.304733	171	0.000271378	19.1331	654.739	607.478	-0.108788	0.380733	FALSE	FALSE	NoDiff.
chr20:30945533-30947652	ASXL1	0.0131548	0.271158	0.252492	175	0.000271378	15.548	4445.27	3166.15	-0.489645	6.36973e-09	FALSE	FALSE	Downregulated
chr2:26100557-26101183	ASXL2	0.00179349	0.273805	0.272012	53	0.000500314	14.7311	4076.38	3673.54	-0.150273	0.105524	FALSE	TRUE	NoDiff.
chr10:89578072-89578668	ATAD1	0.00139665	0.473161	0.471765	30	0.000271378	18.9052	2484.68	1700.46	-0.54672	7.74131e-05	FALSE	FALSE	Downregulated
chr2:24148720-24150652	ATAD2B	0.00331244	0.206263	0.202951	148	0.000271378	23.367	3366.22	3048.23	-0.142933	0.176741	FALSE	FALSE	NoDiff.
chr12:51157959-51158439	ATF1	0.00173611	0.343388	0.341652	57	0.00499677	10.2801	2252.06	1413.8	-0.670959	5.67724e-12	TRUE	TRUE	Downregulated
chr2:176031930-176033522	ATF2	0.00390775	0.212343	0.208435	98	0.000791136	13.6888	2467.46	2518.56	0.0300769	0.872449	FALSE	FALSE	NoDiff.
chr1:212779282-212780776	ATF3	0.0359591	0.291369	0.25541	62	0.00238362	11.563	461.295	322.548	-0.516448	0.459391	FALSE	FALSE	NoDiff.
chr22:39915133-39915593	ATF4	0.0581159	0.341783	0.283667	17	0.0219457	8.08215	14031.4	10806.3	-0.376725	0.0675125	TRUE	FALSE	NoDiff.
chr6:32097579-32098021	ATF6B	0.0124575	0.340137	0.327679	20	0.00293094	10.9371	7922.83	6901.53	-0.198955	0.0938541	FALSE	FALSE	NoDiff.
chr12:54019931-54020366	ATF7	0.00207469	0.338273	0.336198	32	0.000271378	16.3224	3773.24	2126.67	-0.826873	1.6578e-16	FALSE	TRUE	Downregulated
chr5:81267439-81268407	ATG10	0.00545238	0.372291	0.366839	89	0.000271378	17.1824	432.869	91.5998	-2.23544	4.92999e-36	FALSE	FALSE	Downregulated
chr5:115177659-115178143	ATG12	0.00396825	0.25083	0.246861	59	0.0997616	6.14671	3634.85	4129.01	0.184198	0.154967	FALSE	FALSE	NoDiff.
chr11:288422-288786	ATHL1	0.0561141	0.431978	0.375864	36	0.000668406	13.843	924.509	496.648	-0.897159	9.64252e-11	FALSE	FALSE	Downregulated
chr14:50998782-51000058	ATL1	0.0156703	0.326195	0.310525	118	0.000271378	18.0042	83.796	38.7512	-1.10899	5.90615e-05	FALSE	TRUE	Downregulated
chr14:51026845-51027569	ATL1	0.102171	0.434902	0.33273	62	0.000500314	14.5842	83.796	38.7512	-1.10899	5.90615e-05	FALSE	TRUE	Downregulated
chr2:38604544-38605475	ATL2	0.0990778	0.407854	0.316242	34	0.00320424	10.7958	3770	2871.68	-0.392314	0.000214766	FALSE	TRUE	Downregulated
chr11:108093532-108094268	ATM	0.00344864	0.231079	0.22763	56	0.0449171	7.18239	3052.03	2237.71	-0.447264	0.00746209	FALSE	FALSE	Downregulated
chr16:81069736-81070256	ATMIN	0.00825855	0.221098	0.212839	56	0.0121283	8.80972	8779.99	8773.09	-0.00112679	0.992807	FALSE	FALSE	NoDiff.
chr12:7036630-7038931	ATN1	0.0557488	0.494005	0.433436	167	0.000271378	19.705	7066.15	1736.68	-2.02464	1.40059e-78	FALSE	TRUE	Downregulated
chr13:113343891-113345473	ATP11A	0.0188196	0.296887	0.282705	170	0.000500314	14.4883	2764.6	727.9	-1.9261	1.58347e-90	FALSE	FALSE	Downregulated
chr3:182511446-182512251	ATP11B	0.0127355	0.368094	0.355358	87	0.000271378	21.4765	2864.06	3372.03	0.235895	0.0533886	FALSE	FALSE	NoDiff.
chr3:193272390-193272869	ATP13A4	0.108122	0.361147	0.253025	12	0.0654221	6.70714	39.1549	208.78	2.4243	4.12136e-18	FALSE	FALSE	Upregulated
chr1:116914886-116917159	ATP1A1	0.0738202	0.437034	0.363213	189	0.000271378	21.9971	29849.3	11639.7	-1.35867	1.46725e-52	TRUE	TRUE	Downregulated
chr19:42497705-42498995	ATP1A3	0.17314	0.421227	0.242275	97	0.0179906	8.3738	132.168	173.995	0.392834	0.103412	TRUE	TRUE	NoDiff.
chr1:169075011-169077418	ATP1B1	0.0139158	0.342418	0.328502	181	0.000271378	31.0646	6406.48	2468.94	-1.37544	7.32162e-18	TRUE	TRUE	Downregulated
chr3:141595199-141596330	ATP1B3	0.00209649	0.214946	0.21285	148	0.000791136	13.5129	4234.88	6337.22	0.581248	2.35734e-06	TRUE	FALSE	Upregulated
chr16:28890486-28891221	ATP2A1	0.0967021	0.448473	0.351771	35	0.00272278	11.3071	367.52	795.352	1.11332	4.53724e-15	TRUE	TRUE	Upregulated
chr16:28890486-28891221	ATP2A1-AS1	0.0967021	0.448473	0.351771	35	0.00272278	11.3071	108.194	89.4171	-0.277752	0.589106	FALSE	TRUE	NoDiff.
chr12:110718154-110719814	ATP2A2	0.0221345	0.374761	0.356403	180	0.000271378	19.5455	19695.4	8680.71	-1.18195	1.50402e-11	FALSE	TRUE	Downregulated
chr17:3867943-3868833	ATP2A3	0.00434026	0.292505	0.288164	36	0.000791136	13.523	8228.29	17080.9	1.05362	6.96801e-26	TRUE	FALSE	Upregulated
chr1:203595542-203596101	ATP2B4	0.0870509	0.395592	0.308541	19	0.0114188	8.89801	2332.12	1767.6	-0.399698	6.74493e-05	FALSE	TRUE	Downregulated
chr3:130612873-130613906	ATP2C1	0.00368364	0.328449	0.324766	69	0.000271378	20.2235	4603.34	5267.44	0.194224	0.0317926	TRUE	TRUE	Upregulated
chr19:1240309-1240986	ATP5D	0.0630149	0.323611	0.260596	65	0.00340365	10.6713	2017.81	1476.82	-0.450525	0.000942638	FALSE	FALSE	Downregulated
chr12:54070292-54070668	ATP5G2	0.152247	0.379085	0.226838	22	0.0242367	7.96758	18788.5	15124.1	-0.312918	0.0170644	TRUE	TRUE	Downregulated
chr2:176045498-176046198	ATP5G3	0.0255364	0.285741	0.260205	33	0.00401987	10.5194	8063.5	7248.28	-0.153818	0.277555	FALSE	FALSE	NoDiff.
chr4:668556-668858	ATP5I	0.0205556	0.238615	0.218059	19	0.0563422	6.89976	11468.4	9246.51	-0.310714	0.0115742	FALSE	FALSE	Downregulated
chr17:40610920-40611392	ATP6V0A1	0.0128024	0.244756	0.231954	20	0.0193973	8.26235	2299.66	3191.11	0.473191	2.72689e-06	FALSE	FALSE	Upregulated
chr12:124196206-124196588	ATP6V0A2	0.011436	0.241816	0.23038	22	0.00238362	11.7873	2045.5	2283.49	0.15837	0.17602	FALSE	FALSE	NoDiff.
chr16:67515415-67515640	ATP6V0D1	0.0833599	0.29932	0.21596	5	0.0612823	6.80141	4798.92	8023.89	0.741337	2.18146e-10	FALSE	FALSE	Upregulated
chr5:172410388-172410698	ATP6V0E1	0.00515464	0.243158	0.238003	9	0.0607781	6.81156	9785.88	13862.7	0.502301	3.27249e-08	FALSE	FALSE	Upregulated
chr7:149569987-149570733	ATP6V0E2	0.00148955	0.241412	0.239922	60	0.000791136	13.2664	2225.95	2944.19	0.402978	0.0285968	TRUE	FALSE	Upregulated
chr7:149571220-149571544	ATP6V0E2-AS1	0.0222451	0.313027	0.290781	23	0.0965938	6.19236	90.2936	183.097	1.01955	2.29728e-07	TRUE	FALSE	Upregulated
chr3:113464092-113466425	ATP6V1A	0.00370685	0.247405	0.243698	136	0.000271378	17.5892	6158.21	11651.6	0.919966	1.91744e-39	TRUE	FALSE	Upregulated
chr2:71162550-71163175	ATP6V1B1	0.408815	0.874028	0.465212	9	0.00635215	9.90439	367.142	328.746	-0.156788	0.445645	TRUE	TRUE	NoDiff.
chr2:71175614-71176105	ATP6V1B1-AS1	0.101135	0.366385	0.26525	23	0.0026137	11.4169	34.1747	58.8553	0.784079	0.0205757	FALSE	TRUE	Upregulated
chr2:10861778-10862885	ATP6V1C2	0.246128	0.451186	0.205057	73	0.0084827	9.37664	287.707	655.926	1.18941	6.71526e-08	FALSE	FALSE	Upregulated
chr6:31514352-31515225	ATP6V1G2	0.0012285	0.364731	0.363502	18	0.000668406	14.2008	60.0457	83.5326	0.479557	0.0748643	FALSE	FALSE	NoDiff.
chr8:54755296-54755606	ATP6V1H	0.00552486	0.205863	0.200338	18	0.00969814	9.09868	1845.5	2484.72	0.429642	5.93886e-06	FALSE	FALSE	Upregulated
chr4:42658560-42659114	ATP8A1	0.00265957	0.325118	0.321435	63	0.00401987	10.5411	627.261	1129.66	0.849729	0.000223371	TRUE	FALSE	Upregulated
chr18:55469200-55470899	ATP8B1	0.00567439	0.462183	0.467725	138	0.000271378	20.9538	3921.67	2125.66	-0.883246	2.0319e-07	FALSE	TRUE	Downregulated
chr1:154297174-154298956	ATP8B2	0.121502	0.598272	0.468817	118	0.000791136	13.624	5482.81	1728.67	-1.66491	2.648e-24	TRUE	TRUE	Downregulated
chr19:1811479-1812188	ATP8B3	0.130409	0.451811	0.334679	38	0.0530381	6.99053	51.2592	98.8213	0.949501	0.00884511	FALSE	TRUE	Upregulated
chr20:50383814-50385180	ATP9A	0.00622032	0.314267	0.308047	148	0.000271378	22.3963	18939.7	5150.29	-1.87865	4.87325e-47	TRUE	FALSE	Downregulated
chr17:17942837-17943548	ATPAF2	0.0333604	0.290017	0.244836	81	0.00248077	11.4947	741.798	1054.54	0.506446	6.45781e-06	FALSE	FALSE	Upregulated
chr3:142297121-142297699	ATR	0	0.230524	0.230524	39	0.000271378	18.835	3712.74	2345.88	-0.662217	9.76306e-07	TRUE	FALSE	Downregulated
chr10:116852740-116853757	ATRNL1	0.0198318	0.400298	0.380466	133	0.000791136	13.39	668.712	117.527	-2.50444	5.07357e-44	TRUE	FALSE	Downregulated
chrX:77040152-77041683	ATRX	0.0339461	0.367544	0.333598	65	0.000500314	14.4383	8795.36	4837.21	-0.862426	1.14265e-14	FALSE	FALSE	Downregulated
chr6:16760264-16762227	ATXN1	0.00641972	0.612897	0.608806	196	0.000271378	28.1864	3673.06	820.168	-2.16292	2.57208e-38	TRUE	TRUE	Downregulated
chr22:46067473-46068105	ATXN10	0.0107855	0.431688	0.438057	64	0.00725794	9.6655	3085.21	964.1	-1.67862	8.88448e-46	FALSE	TRUE	Downregulated
chr12:112035251-112037943	ATXN2	0.00458784	0.41751	0.421014	260	0.000271378	22.0048	2633.62	1798.5	-0.549965	1.06025e-07	FALSE	TRUE	Downregulated
chr16:28833945-28836110	ATXN2L	0.00881297	0.361336	0.351456	205	0.000271378	26.9153	14799.2	6717.13	-1.13961	6.3674e-30	FALSE	TRUE	Downregulated
chr14:92571955-92572780	ATXN3	0.00656805	0.377178	0.37061	41	0.000271378	21.6851	2767.92	2194.58	-0.334358	0.0110627	FALSE	TRUE	Downregulated
chr3:63848561-63850314	ATXN7	0.0344697	0.283494	0.249315	185	0.000271378	40.3818	7094.65	8530.86	0.266015	0.00079231	FALSE	TRUE	Upregulated
chr7:105516581-105517522	ATXN7L1	0.00219636	0.428325	0.426171	86	0.000271378	21.6411	1282.72	219.574	-2.54581	9.9932e-89	FALSE	TRUE	Downregulated
chr1:110025852-110027344	ATXN7L2	0.0307761	0.351334	0.320558	98	0.000271378	23.8943	606.379	336.22	-0.851792	1.13937e-10	TRUE	TRUE	Downregulated
chr17:42276040-42278225	ATXN7L3	0.00619905	0.451961	0.461486	221	0.000271378	26.3201	4057.99	1630.75	-1.31537	1.98549e-41	TRUE	TRUE	Downregulated
chr1:26185051-26185917	AUNIP	0.0387234	0.261572	0.222849	46	0.00248077	11.4487	627.902	317.774	-0.983406	1.68933e-10	TRUE	FALSE	Downregulated
chr17:8113250-8113818	AURKB	0.00667497	0.379701	0.373026	30	0.00177479	12.509	3546.31	1211.92	-1.549	1.66564e-29	TRUE	TRUE	Downregulated
chr7:69062688-69065497	AUTS2	0.0294344	0.538752	0.519269	257	0.000271378	37.8708	81.6373	49.4702	-0.716593	0.082466	FALSE	TRUE	NoDiff.
chr15:34330918-34331337	AVEN	0.00526316	0.278505	0.262125	66	0.0560849	6.90628	592.418	451.096	-0.392623	0.00383398	FALSE	FALSE	Downregulated
chr10:99447141-99447528	AVPI1	0.020285	0.261286	0.241001	36	0.0855376	6.34215	521.811	420.831	-0.311119	0.0244448	FALSE	FALSE	Downregulated
chr17:63556066-63558047	AXIN2	0.021173	0.49268	0.471278	239	0.000271378	34.6279	190.189	179.967	-0.0822282	0.758752	FALSE	TRUE	NoDiff.
chr8:103876597-103877048	AZIN1	0.00194526	0.30317	0.301225	50	0.000271378	15.2072	18176.7	20716.5	0.188638	0.0845676	TRUE	FALSE	NoDiff.
chr8:103876597-103877048	AZIN1-AS1	0.00194526	0.30317	0.301225	50	0.000271378	15.2072	200.853	105.032	-0.93705	2.95262e-05	TRUE	FALSE	Downregulated
chr15:45003832-45004443	B2M	0.00162338	0.28377	0.282147	51	0.000668406	14.309	9719.93	21223.4	1.12663	1.06564e-54	TRUE	FALSE	Upregulated
chr1:235666823-235668761	B3GALNT2	0.00403902	0.259366	0.255894	177	0.000271378	20.4361	2309.29	2124.04	-0.120981	0.256069	FALSE	TRUE	NoDiff.
chr6:33244752-33245273	B3GALT4	0.00832371	0.364344	0.35602	67	0.000271378	16.5703	224.665	79.8017	-1.48805	7.57017e-11	FALSE	FALSE	Downregulated
chr21:40984652-40985120	B3GALT5	0.00636753	0.226036	0.219669	68	0.00540774	10.2047	53.2968	193.165	1.86717	1.20607e-17	FALSE	FALSE	Upregulated
chr21:40984652-40985120	B3GALT5-AS1	0.00636753	0.226036	0.219669	68	0.00540774	10.2047	20.031	63.8746	1.68219	0.000204444	FALSE	FALSE	Upregulated
chr13:31773920-31774437	B3GLCT	0.00486951	0.456258	0.451388	81	0.000271378	22.053	632.722	135.559	-2.22191	1.73151e-41	TRUE	TRUE	Downregulated
chr2:62423297-62425235	B3GNT2	0.00666438	0.33914	0.330609	137	0.000271378	25.7509	1092.91	1718.53	0.653081	8.19018e-12	TRUE	FALSE	Upregulated
chr19:17905580-17906117	B3GNT3	0.312694	0.734565	0.421871	34	0.0664857	6.68492	195.794	73.1655	-1.4242	7.84691e-13	FALSE	TRUE	Downregulated
chr12:122687890-122688473	B3GNT4	0.00221058	0.208989	0.206778	67	0.0151893	8.57355	107.4	532.135	2.30176	2.21547e-23	TRUE	FALSE	Upregulated
chr17:81009930-81010182	B3GNTL1	0.061835	0.300184	0.238349	22	0.00818561	9.50595	396.694	258.266	-0.616682	0.00109125	FALSE	TRUE	Downregulated
chr12:58026116-58027520	B4GALNT1	0.0185453	0.406525	0.38798	108	0.000271378	18.3932	688.526	199.138	-1.79027	0.000145053	FALSE	TRUE	Downregulated
chr17:47209860-47210501	B4GALNT2	0.0557709	0.275357	0.219586	61	0.00376152	10.6387	7.06017	56.4428	3.00749	9.84614e-09	FALSE	FALSE	Upregulated
chr12:568826-569519	B4GALNT3	0.0161485	0.321575	0.310532	83	0.00384605	10.5912	83.5149	16.5521	-2.329	1.28285e-09	TRUE	TRUE	Downregulated
chr11:368514-369022	B4GALNT4	0.0373016	0.498157	0.458931	23	0.0051072	10.2499	1762.35	634.923	-1.47331	2.14309e-33	FALSE	TRUE	Downregulated
chr1:44444289-44444789	B4GALT2	0.14646	0.420433	0.273973	22	0.0297199	7.73135	1145.2	711.039	-0.688724	7.6211e-05	FALSE	FALSE	Downregulated
chr3:118959437-118959933	B4GALT4	0	0.30311	0.30311	67	0.000271378	16.3889	891.63	753.411	-0.242763	0.0346994	FALSE	FALSE	Downregulated
chr20:48329407-48330289	B4GALT5	0.0595238	0.469074	0.409551	74	0.000791136	13.3173	3656.96	1671.66	-1.1289	7.6259e-44	TRUE	TRUE	Downregulated
chr18:29263990-29265487	B4GALT6	0.0502163	0.411793	0.361755	166	0.000271378	18.9764	228.805	139.618	-0.71502	0.00138395	TRUE	TRUE	Downregulated
chr5:177025553-177027860	B4GALT7	0.0527968	0.304194	0.251397	133	0.000271378	20.4557	1067.32	929.317	-0.200015	0.114571	FALSE	FALSE	NoDiff.
chr11:66114639-66115545	B4GAT1	0.00252208	0.294894	0.298244	115	0.000271378	16.4654	751.621	547.17	-0.459037	0.0207382	FALSE	FALSE	Downregulated
chr11:117185249-117187540	BACE1	0.161237	0.432625	0.271388	106	0.000959715	12.9685	6028.08	4007.39	-0.589241	1.38291e-11	FALSE	TRUE	Downregulated
chr21:42539232-42541107	BACE2	0.0630083	0.508735	0.445726	189	0.000271378	23.6754	1208.79	150.188	-3.0128	1.52752e-52	TRUE	TRUE	Downregulated
chr11:64052111-64054328	BAD	0.0950239	0.409338	0.316152	166	0.000668406	14.1408	1334.2	2295.87	0.782277	7.93143e-06	FALSE	TRUE	Upregulated
chr6:57036987-57037660	BAG2	0.00899578	0.240331	0.231335	78	0.000959715	13.055	271.283	508.194	0.904161	2.71101e-06	TRUE	FALSE	Upregulated
chr10:121410328-121412191	BAG3	0.0115603	0.292341	0.275568	168	0.000271378	16.2034	11384.7	8394.18	-0.439751	4.0596e-08	FALSE	FALSE	Downregulated
chr8:38034279-38034966	BAG4	0.0018797	0.342532	0.352035	49	0.0138094	8.68348	1180.45	1338.66	0.181321	0.125258	FALSE	FALSE	NoDiff.
chr14:104027756-104028711	BAG5	0.00703387	0.339095	0.332061	56	0.000271378	16.3844	7605.14	5660.95	-0.42586	7.48203e-06	FALSE	FALSE	Downregulated
chr21:11099978-11100696	BAGE	0.102989	0.498168	0.395179	17	0.00248077	11.4348	158.946	204.003	0.359535	0.0747339	FALSE	TRUE	NoDiff.
chr17:79369801-79372047	BAHCC1	0.012575	0.226352	0.213777	199	0.000271378	25.8778	2680.52	1657.25	-0.693433	1.29991e-11	FALSE	FALSE	Downregulated
chr15:40731625-40734696	BAHD1	0.0300125	0.40523	0.375421	289	0.000271378	23.3607	2979.81	2595.8	-0.199365	0.110183	FALSE	TRUE	NoDiff.
chr17:79007863-79008615	BAIAP2	0.0616417	0.451721	0.39008	60	0.000271378	14.9699	1701.62	4258.77	1.32288	3.89289e-17	TRUE	TRUE	Upregulated
chr17:79007863-79008615	BAIAP2-AS1	0.0616417	0.451721	0.39008	60	0.000271378	14.9699	1540.54	781.928	-0.978885	5.88693e-11	FALSE	TRUE	Downregulated
chr7:98029297-98030351	BAIAP2L1	0.122929	0.567075	0.443213	61	0.000271378	16.5454	1084.72	884.498	-0.295135	0.0111827	TRUE	TRUE	Downregulated
chr6:33547163-33548127	BAK1	0.0496933	0.336064	0.286371	26	0.0039534	10.5778	2828.54	3105.19	0.134245	0.609943	TRUE	TRUE	NoDiff.
chr10:28965390-28966336	BAMBI	0.0496784	0.427538	0.37786	78	0.00340365	10.6649	10921.7	4821.47	-1.17954	2.70008e-18	TRUE	FALSE	Downregulated
chr16:87985109-87985464	BANP	0.00239234	0.237993	0.232909	57	0.0127586	8.76426	1225.3	1671.87	0.448059	0.000347457	FALSE	FALSE	Upregulated
chr3:52443424-52444541	BAP1	0.0200306	0.495256	0.515051	95	0.00191034	12.4746	2405.04	810.191	-1.56993	1.25289e-49	TRUE	TRUE	Downregulated
chr11:129244909-129245834	BARX2	0.0205133	0.345779	0.327516	88	0.000271378	16.3481	372.341	256.494	-0.53544	0.00222974	TRUE	FALSE	Downregulated
chr5:17216627-17218577	BASP1	0.00563326	0.563355	0.55943	160	0.000271378	35.9896	12741.7	5842.83	-1.12484	4.39127e-10	FALSE	TRUE	Downregulated
chr14:75988554-75989464	BATF	0.0494315	0.449733	0.400302	14	0.00220229	12.1414	880.672	1165.68	0.405003	9.58761e-05	FALSE	TRUE	Upregulated
chr7:72935357-72937040	BAZ1B	0.00437065	0.350806	0.343163	152	0.000271378	19.5727	11854.3	4848.11	-1.29002	4.56732e-31	TRUE	TRUE	Downregulated
chr12:57023131-57024121	BAZ2A	0.00333966	0.439392	0.42805	68	0.000271378	21.045	13267.2	7753.84	-0.774883	2.83275e-31	TRUE	TRUE	Downregulated
chr12:57027639-57030450	BAZ2A	0.0535752	0.61226	0.558685	102	0.000271378	28.5847	13267.2	7753.84	-0.774883	2.83275e-31	TRUE	TRUE	Downregulated
chr2:160471238-160473062	BAZ2B	0.0147206	0.457052	0.442331	86	0.000271378	18.8608	2968.48	1730.68	-0.778029	1.36305e-07	FALSE	TRUE	Downregulated
chr2:160568510-160569790	BAZ2B	0.0104179	0.240831	0.230413	109	0.000271378	21.7386	2968.48	1730.68	-0.778029	1.36305e-07	FALSE	FALSE	Downregulated
chr10:112679255-112680020	BBIP1	0.00329548	0.302332	0.305781	89	0.00320424	10.7929	884.263	1535.79	0.79734	3.69714e-08	FALSE	FALSE	Upregulated
chr11:27061533-27061983	BBOX1	0.0643824	0.431028	0.366646	5	0.0857795	6.33646	0.577342	63.4432	6.93447	3.80866e-10	FALSE	FALSE	Upregulated
chr7:33169161-33169682	BBS9	0.00635197	0.274575	0.268223	22	0.000271378	26.5793	1340.94	1569.45	0.227836	0.0817042	FALSE	FALSE	NoDiff.
chr19:45310405-45312455	BCAM	0.0396851	0.479873	0.43938	74	0.000271378	20.3075	3624.98	3246.53	-0.159121	0.296352	FALSE	TRUE	NoDiff.
chr7:107220690-107221155	BCAP29	0.00187617	0.29531	0.293434	55	0.000959715	12.9943	2530.72	1736.13	-0.543672	7.04203e-07	TRUE	FALSE	Downregulated
chrX:152989323-152990778	BCAP31	0.0381223	0.31646	0.277247	137	0.0031528	10.8746	16138.8	20140	0.319453	0.000708755	FALSE	TRUE	Upregulated
chr16:75298825-75300245	BCAR1	0.0250473	0.30533	0.280283	127	0.000271378	18.8939	3638.65	6038.42	0.73041	1.48727e-09	FALSE	TRUE	Upregulated
chr1:94050221-94051420	BCAR3	0.0824283	0.412513	0.330085	18	0.0579398	6.86912	545.213	508.814	-0.0976389	0.600652	FALSE	FALSE	NoDiff.
chr1:94146387-94147823	BCAR3	0.0606049	0.356637	0.294684	130	0.000271378	15.6486	545.213	508.814	-0.0976389	0.600652	FALSE	FALSE	NoDiff.
chr1:94313454-94313718	BCAR3	0.00222222	0.242823	0.240601	27	0.0527301	7.00691	545.213	508.814	-0.0976389	0.600652	FALSE	FALSE	NoDiff.
chr20:52687053-52687924	BCAS1	0.410842	0.652471	0.241629	8	0.0283889	7.77295	1398.14	3295.89	1.23736	7.48345e-19	TRUE	TRUE	Upregulated
chr20:49411505-49412201	BCAS4	0.0052721	0.222802	0.21753	74	0.000271378	38.2109	3634.77	5736.57	0.658208	1.89941e-09	FALSE	FALSE	Upregulated
chr19:49313957-49314579	BCAT2	0.00331126	0.339747	0.336436	53	0.000500314	14.3434	3216.46	3747.96	0.22024	0.0291266	FALSE	FALSE	Upregulated
chr12:50221315-50222455	BCDIN3D-AS1	0.0154197	0.471843	0.464467	77	0.000271378	22.0322	218.222	179.523	-0.278217	0.32125	FALSE	TRUE	NoDiff.
chr6:80816480-80816921	BCKDHB	0.00347222	0.208803	0.20533	27	0.0793544	6.44519	932.734	1062.86	0.189589	0.301705	FALSE	FALSE	NoDiff.
chr14:99736671-99741535	BCL11B	0.104682	0.485528	0.380846	331	0.000271378	28.2643	588.502	264.246	-1.15195	1.13929e-14	TRUE	TRUE	Downregulated
chr18:60985399-60987743	BCL2	0.0161852	0.361251	0.342824	198	0.000791136	13.4723	1813.38	397.459	-2.18943	1.66875e-18	TRUE	FALSE	Downregulated
chr20:30310246-30311012	BCL2L1	0.00367647	0.337131	0.333455	39	0.000271378	19.4261	2163.82	3179.85	0.555794	2.92151e-11	FALSE	FALSE	Upregulated
chr2:111877639-111881075	BCL2L11	0.0275887	0.255405	0.228172	379	0.000271378	26.9607	2744.77	3068.28	0.160234	0.234618	TRUE	FALSE	NoDiff.
chr14:23776075-23776530	BCL2L2	0.0168337	0.59265	0.575817	14	0.000271378	15.7865	6983.86	3127.03	-1.15895	4.03075e-32	TRUE	TRUE	Downregulated
chr19:45250480-45252054	BCL3	0.00673258	0.44661	0.44085	95	0.000271378	20.2321	867.198	564.375	-0.620756	9.31866e-05	TRUE	TRUE	Downregulated
chr12:122458682-122462241	BCL7A	0.0518623	0.273951	0.222298	330	0.000271378	20.2672	2557.28	2076.92	-0.300781	0.000294644	TRUE	FALSE	Downregulated
chr7:72971823-72972333	BCL7B	0.00501002	0.370208	0.365198	68	0.00218775	12.2903	2180.95	2221.27	0.0258872	0.863726	FALSE	TRUE	NoDiff.
chr16:30907529-30908420	BCL7C	0.0880265	0.451973	0.363947	43	0.00248077	11.4727	1354.8	1506.5	0.152427	0.305549	FALSE	TRUE	NoDiff.
chr11:118779835-118783616	BCL9L	0.103362	0.61116	0.506016	152	0.000271378	22.5921	14675.4	10820.7	-0.439707	0.000331864	FALSE	TRUE	Downregulated
chrX:39954823-39958215	BCOR	0.0197905	0.512002	0.496012	362	0.000271378	32.8271	2536.63	558.246	-2.18371	9.81771e-69	FALSE	TRUE	Downregulated
chr22:23522551-23522884	BCR	0.01	0.315731	0.305731	49	0.0347058	7.52967	2706.78	1883.94	-0.523401	1.57229e-05	FALSE	FALSE	Downregulated
chr22:21457156-21457753	BCRP2	0.0493545	0.396418	0.347064	16	0.0151893	8.57799	52.596	47.954	-0.129249	0.707814	FALSE	FALSE	NoDiff.
chr3:197282119-197283276	BDH1	0.0287566	0.293561	0.264804	104	0.000271378	15.0772	1650.48	600.262	-1.45981	2.00109e-27	FALSE	FALSE	Downregulated
chr14:96671020-96671650	BDKRB2	0.0707505	0.637891	0.567141	23	0.000271378	18.0736	202.993	520.543	1.36081	7.66366e-11	TRUE	TRUE	Upregulated
chr11:27527782-27528250	BDNF-AS	0	0.221444	0.221444	32	0.0082215	9.46033	102.063	206.682	1.01863	2.94176e-05	FALSE	FALSE	Upregulated
chr5:70751422-70751886	BDP1	0.00271739	0.216309	0.213591	38	0.0031528	10.8715	5104.7	3062.66	-0.737069	3.00984e-12	FALSE	FALSE	Downregulated
chr14:101034116-101034788	BEGAIN	0.0992966	0.489407	0.390111	88	0.000271378	16.3065	120.211	75.1397	-0.677795	0.00569805	FALSE	TRUE	Downregulated
chr6:107436094-107437997	BEND3	0.00704194	0.361485	0.353218	174	0.000271378	26.7086	924.992	440.485	-1.07186	4.02485e-13	FALSE	FALSE	Downregulated
chr6:56818459-56821004	BEND6	0.0364174	0.370686	0.331818	205	0.000271378	23.8885	121.58	76.7557	-0.668516	0.013297	FALSE	FALSE	Downregulated
chr11:208423-209353	BET1L	0.0134403	0.282766	0.285975	76	0.000500314	14.7576	1694.81	2794.13	0.721245	7.32392e-14	FALSE	FALSE	Upregulated
chrX:102565535-102566254	BEX2	0.0368247	0.286621	0.249796	50	0.0031528	10.869	440.935	250.991	-0.811136	0.00340583	TRUE	FALSE	Downregulated
chrX:101409770-101411095	BEX5	0.0232614	0.293883	0.270622	48	0.00163634	12.6385	143.741	696.169	2.28103	1.05534e-20	FALSE	FALSE	Upregulated
chr20:17549725-17550768	BFSP1	0.00437346	0.633929	0.628628	71	0.000271378	28.1493	196.529	415.996	1.07897	3.48893e-12	FALSE	TRUE	Upregulated
chr3:5019354-5022278	BHLHE40	0.00678148	0.457922	0.45114	204	0.000271378	36.8345	1066.05	299.995	-1.8289	5.60328e-29	FALSE	TRUE	Downregulated
chr12:32259458-32261086	BICD1	0.0061991	0.350519	0.345698	108	0.000271378	16.2281	544.253	230.674	-1.23835	1.2427e-16	TRUE	FALSE	Downregulated
chr9:95526843-95527647	BICD2	0.00382653	0.276262	0.270162	101	0.00272278	11.1771	1958.76	1103.41	-0.828444	2.21369e-09	FALSE	TRUE	Downregulated
chr22:18255804-18257558	BID	0.0687629	0.336866	0.267515	125	0.000668406	13.8863	1671.94	1842.45	0.139374	0.439788	TRUE	FALSE	NoDiff.
chr22:43506014-43506761	BIK	0.0537037	0.271391	0.217254	56	0.0113685	8.91561	336.718	407.686	0.274874	0.0871624	TRUE	FALSE	NoDiff.
chr2:127864447-127865372	BIN1	0.0292824	0.351329	0.322046	101	0.000500314	14.3518	27.3814	66.9796	1.28155	4.29177e-05	TRUE	FALSE	Upregulated
chr15:91259684-91260063	BLM	0.0181739	0.317936	0.299762	8	0.0476661	7.1251	1647.2	745.731	-1.14387	9.91311e-13	FALSE	FALSE	Downregulated
chr17:28618691-28619459	BLMH	0.0122196	0.266432	0.256741	89	0.0834979	6.37089	930.607	364.349	-1.35439	3.10606e-16	FALSE	FALSE	Downregulated
chr10:98031913-98033155	BLNK	0.157521	0.508483	0.350962	11	0.0441325	7.218	309.002	237.1	-0.379862	0.275041	FALSE	TRUE	NoDiff.
chr12:56109593-56109767	BLOC1S1	0.227273	0.494001	0.266728	4	0.0490328	7.08149	1185.44	1004.67	-0.239034	0.18353	TRUE	FALSE	NoDiff.
chr15:45879376-45880019	BLOC1S6	0.013473	0.266113	0.260508	55	0.018705	8.30667	1728.79	1690.41	-0.0318376	0.801923	FALSE	FALSE	NoDiff.
chr7:43797923-43798454	BLVRA	0.0254576	0.246445	0.220987	60	0.00816356	9.53262	2818.74	1849.43	-0.607454	5.30136e-08	TRUE	FALSE	Downregulated
chr1:169336614-169336810	BLZF1	0.0130276	0.249045	0.236017	5	0.0502305	7.05081	1998.48	2495.91	0.321103	0.0095623	FALSE	FALSE	Upregulated
chr15:40400748-40401736	BMF	0.00692533	0.328468	0.32316	74	0.00272278	11.08	1736.58	1628.98	-0.0927883	0.716503	TRUE	FALSE	NoDiff.
chr10:22609471-22610757	BMI1	0.00525415	0.431893	0.426808	182	0.000271378	16.4946	767.729	201.265	-1.93426	2.28922e-30	TRUE	TRUE	Downregulated
chr8:22022193-22023395	BMP1	0.0112305	0.539076	0.531402	129	0.000271378	18.1406	845.428	433.495	-0.96481	1.20359e-08	TRUE	TRUE	Downregulated
chr4:79696776-79697897	BMP2K	0.00500467	0.26222	0.276684	138	0.000500314	14.4664	644.632	745.69	0.209514	0.121539	FALSE	FALSE	NoDiff.
chr14:54419109-54421120	BMP4	0.24936	0.515971	0.26661	126	0.000271378	15.8346	438.016	92.464	-2.23852	1.00736e-23	TRUE	TRUE	Downregulated
chr14:54423286-54423845	BMP4	0.196862	0.704153	0.507291	43	0.0160694	8.49854	438.016	92.464	-2.23852	1.00736e-23	TRUE	TRUE	Downregulated
chr20:55841100-55841793	BMP7	0.027245	0.3804	0.353155	85	0.000271378	15.7007	4587.24	3523.91	-0.380788	0.000176842	TRUE	TRUE	Downregulated
chr1:40254847-40255266	BMP8B	0.1859	0.529036	0.343136	38	0.0148523	8.61102	354.504	354.587	5.2787e-05	0.999738	FALSE	FALSE	NoDiff.
chr7:33944512-33945422	BMPER	0.0285204	0.462712	0.436801	88	0.000271378	17.2288	64.9749	46.7972	-0.476395	0.160351	TRUE	TRUE	NoDiff.
chr10:88515440-88517553	BMPR1A	0.00339161	0.327368	0.320987	224	0.000271378	21.5088	1506.67	648.627	-1.2156	2.35259e-26	FALSE	TRUE	Downregulated
chr2:203239428-203240174	BMPR2	0.0231916	0.261774	0.238582	25	0.00863662	9.28198	5554.36	5915.8	0.090851	0.389424	TRUE	FALSE	NoDiff.
chr5:172571312-172571463	BNIP1	0.0234403	0.281636	0.258196	7	0.0506672	7.0462	765.135	1174.24	0.617785	3.13571e-05	FALSE	FALSE	Upregulated
chr15:59981973-59982216	BNIP2	0.0114679	0.264075	0.252607	17	0.0848665	6.35184	2118.44	1481.65	-0.51536	9.09283e-06	FALSE	FALSE	Downregulated
chr10:133794743-133795416	BNIP3	0.00825083	0.26643	0.262754	64	0.010418	8.95891	1865.51	2578.77	0.466902	7.85899e-08	TRUE	FALSE	Upregulated
chr8:26240434-26241491	BNIP3L	0.00226258	0.262922	0.250295	100	0.00272278	11.1532	3044.23	2004.91	-0.601937	1.73907e-07	TRUE	TRUE	Downregulated
chr3:112930344-112931078	BOC	0.00320261	0.522279	0.519076	88	0.000271378	25.0335	41.0293	87.7827	1.09791	0.00828492	FALSE	TRUE	Upregulated
chr2:242497896-242499600	BOK	0.0531635	0.320351	0.267188	179	0.000271378	19.4666	1456.99	1339.95	-0.121361	0.260496	TRUE	FALSE	NoDiff.
chr1:220263662-220263945	BPNT1	0.0191511	0.231263	0.212112	11	0.0900445	6.27812	1775.84	3869.02	1.12292	1.78273e-19	TRUE	FALSE	Upregulated
chr17:65821609-65823505	BPTF	0.0220853	0.41342	0.391334	126	0.000271378	19.3314	22158.1	9325.56	-1.24856	1.34328e-40	FALSE	TRUE	Downregulated
chr7:140623432-140625106	BRAF	0.00877514	0.303113	0.29094	130	0.000271378	19.0889	694.904	252.581	-1.45841	6.18438e-32	FALSE	TRUE	Downregulated
chr17:41276492-41277274	BRCA1	0.00554239	0.243244	0.237701	33	0.00248077	11.4362	4019.33	1551.08	-1.37391	6.01607e-12	FALSE	FALSE	Downregulated
chr22:50219436-50221634	BRD1	0.0286718	0.252569	0.219738	257	0.000791136	13.2748	1805.2	1380.54	-0.38691	5.37674e-06	FALSE	FALSE	Downregulated
chr6:32936189-32939307	BRD2	0.00295086	0.470675	0.472517	151	0.000271378	29.7491	20051.4	12690.9	-0.659962	9.38783e-14	FALSE	TRUE	Downregulated
chr16:50403013-50403867	BRD7	0.264764	0.550397	0.285633	12	0.0942779	6.22126	2419.09	1920.4	-0.333445	0.000251903	FALSE	FALSE	Downregulated
chr7:97910354-97911007	BRI3	0	0.240091	0.247054	65	0.00669853	9.79515	798.232	1260.37	0.659661	0.00446523	TRUE	TRUE	Upregulated
chr1:177139876-177140373	BRINP2	0.00828857	0.244719	0.23643	29	0.000668406	14.1573	374.847	118.084	-1.66303	6.35715e-14	TRUE	FALSE	Downregulated
chr1:222884534-222885654	BROX	0.0110865	0.406071	0.403401	48	0.000271378	16.9892	3508.4	3778.19	0.107017	0.270114	FALSE	FALSE	NoDiff.
chr6:36164024-36164872	BRPF3	0.00274718	0.445515	0.444393	104	0.000271378	19.5544	3744.65	875.488	-2.09725	1.03718e-78	TRUE	TRUE	Downregulated
chr11:1411297-1411451	BRSK2	0	0.221535	0.239182	36	0.0585592	6.85796	198.754	467.536	1.23003	5.58226e-11	TRUE	FALSE	Upregulated
chr21:40685191-40686191	BRWD1	0.00332197	0.365728	0.362406	135	0.000271378	19.5595	13109.3	8064.6	-0.700828	0.000384094	FALSE	FALSE	Downregulated
chr21:40685191-40686191	BRWD1-AS1	0.00332197	0.365728	0.362406	135	0.000271378	19.5595	27.5278	54.4835	0.980062	0.0416299	FALSE	FALSE	Upregulated
chr21:40685191-40686191	BRWD1-IT2	0.00332197	0.365728	0.362406	135	0.000271378	19.5595	165.055	94.0743	-0.806198	0.000421134	FALSE	FALSE	Downregulated
chrX:80063568-80066042	BRWD3	0.0501438	0.524909	0.472223	108	0.000271378	18.123	865.233	204.128	-2.081	5.48249e-53	FALSE	TRUE	Downregulated
chr11:62474023-62474278	BSCL2	0.0210017	0.236607	0.215605	16	0.0127076	8.77186	1346.24	1617.25	0.263655	0.0655644	FALSE	FALSE	NoDiff.
chr1:32860385-32861337	BSDC1	0.0489662	0.309964	0.260998	27	0.00384605	10.6037	3708.01	9834.39	1.40713	2.62662e-55	FALSE	FALSE	Upregulated
chr19:570900-572190	BSG	0.01648	0.448829	0.432349	74	0.000271378	24.0879	25718.4	32227.2	0.325421	0.000699375	FALSE	FALSE	Upregulated
chr9:116111664-116113477	BSPRY	0.112493	0.353473	0.24098	100	0.00207279	12.3919	1467.81	1141.38	-0.362916	5.47711e-05	FALSE	FALSE	Downregulated
chr11:13485091-13485480	BTBD10	0.00493402	0.221536	0.216602	21	0.0057678	10.1493	2151.1	2194.9	0.0294165	0.782352	FALSE	FALSE	NoDiff.
chr12:107711648-107712901	BTBD11	0.0292982	0.283818	0.25452	102	0.000791136	13.383	149.428	269.323	0.850214	3.55188e-06	TRUE	FALSE	Upregulated
chr19:2015017-2015543	BTBD2	0.0333434	0.534177	0.500834	51	0.000500314	14.3672	2914.54	369.398	-2.98016	3.03521e-97	TRUE	TRUE	Downregulated
chr20:11871248-11873251	BTBD3	0.00736872	0.303312	0.296976	154	0.000271378	20.3156	1918.02	1513.6	-0.341868	0.000545483	FALSE	FALSE	Downregulated
chr1:92545986-92546593	BTBD8	0.00644081	0.2405	0.234059	38	0.00969814	9.09609	50.838	40.4427	-0.324793	0.41487	FALSE	FALSE	NoDiff.
chr6:38606977-38607851	BTBD9	0.00208333	0.251068	0.248985	82	0.000500314	14.3787	957.446	759.598	-0.333636	0.0013713	FALSE	FALSE	Downregulated
chr1:203274731-203275927	BTG2	0.108182	0.422578	0.314396	61	0.0051072	10.2501	2671.12	1304.11	-1.0341	3.20432e-09	FALSE	FALSE	Downregulated
chr6:26383484-26383876	BTN2A2	0.0530189	0.483619	0.4306	18	0.000271378	19.0782	316.853	425.744	0.427423	0.0102637	TRUE	TRUE	Upregulated
chr6:26421791-26422263	BTN2A3P	0.0417533	0.455152	0.413399	23	0.00833757	9.40463	129.38	68.3639	-0.919076	1.40824e-05	FALSE	FALSE	Downregulated
chr6:105584589-105585110	BVES	0.0423768	0.266379	0.224002	69	0.0129998	8.75352	10.0932	74.7325	2.88687	2.40906e-08	TRUE	TRUE	Upregulated
chr2:201674760-201677688	BZW1	0.0331444	0.247281	0.213254	165	0.000271378	18.1875	18747.6	13893.8	-0.432337	0.00256915	FALSE	TRUE	Downregulated
chr7:16684422-16685352	BZW2	0.00607598	0.280759	0.274683	55	0.000271378	15.2926	5773.38	4693.98	-0.298752	0.000308108	FALSE	FALSE	Downregulated
chr10:15138793-15140066	C10orf111	0.00234402	0.202379	0.200035	110	0.000271378	21.7553	76.9636	93.2243	0.280922	0.304643	FALSE	FALSE	NoDiff.
chr10:102747316-102747806	C10orf2	0.0242279	0.238999	0.214771	27	0.00424989	10.4896	2405.81	1435.37	-0.745657	1.43789e-14	TRUE	FALSE	Downregulated
chr10:71389654-71390188	C10orf35	0.0354028	0.472693	0.43729	47	0.00305821	10.9214	594.862	346.474	-0.781204	0.000634456	TRUE	TRUE	Downregulated
chr10:124713297-124713820	C10orf88	0.00846276	0.289078	0.275799	46	0.0161633	8.47569	600.147	411.139	-0.544947	5.76503e-05	FALSE	FALSE	Downregulated
chr10:104210948-104211488	C10orf95	0.0504676	0.298452	0.247984	21	0.00981226	9.05356	298.287	281.077	-0.0836064	0.647603	FALSE	FALSE	NoDiff.
chr11:57508892-57509483	C11orf31	0.00591199	0.247939	0.242027	53	0.00444491	10.4381	2827.99	2253.94	-0.327466	0.00187064	FALSE	FALSE	Downregulated
chr11:128775463-128775919	C11orf45	0.0207482	0.583576	0.562828	28	0.000500314	14.3799	87.7448	23.9982	-1.8662	8.92143e-11	TRUE	TRUE	Downregulated
chr11:46958216-46958558	C11orf49	0.00308642	0.217855	0.214768	23	0.000791136	13.6977	1563.25	1901.5	0.282281	0.00128016	FALSE	FALSE	Upregulated
chr11:111944911-111945600	C11orf57	0.00392157	0.321543	0.317622	36	0.00904836	9.19385	1418.01	986.17	-0.524047	2.89748e-05	TRUE	FALSE	Downregulated
chr11:122753402-122754624	C11orf63	0.0202137	0.35399	0.332516	86	0.00238362	11.5839	193.693	32.776	-2.5622	7.53764e-24	FALSE	TRUE	Downregulated
chr11:65686727-65687892	C11orf68	0.0293722	0.398472	0.369099	106	0.000271378	16.9404	1201.57	1808.96	0.591092	7.9214e-07	FALSE	TRUE	Upregulated
chr11:63580871-63582494	C11orf84	0.0754424	0.4446	0.369158	110	0.000271378	21.7786	1603.53	862.782	-0.89475	5.13345e-06	TRUE	FALSE	Downregulated
chr11:63536387-63536795	C11orf95	0.0105516	0.364911	0.354359	60	0.00886898	9.23672	601.714	1281.74	1.08932	1.86398e-13	TRUE	FALSE	Upregulated
chr11:62432908-62433416	C11orf98	0.0082719	0.358705	0.350433	40	0.000271378	17.7177	1737.35	2009.59	0.20953	0.432338	FALSE	FALSE	NoDiff.
chr12:117174227-117175726	C12orf49	0.0101542	0.556478	0.546324	45	0.000271378	16.3889	6347.64	6643.91	0.0656692	0.530896	FALSE	TRUE	NoDiff.
chr12:14955232-14956066	C12orf60	0.117462	0.462208	0.344745	17	0.00582953	10.0701	105.009	48.1724	-1.1217	0.000130449	TRUE	FALSE	Downregulated
chr12:123716634-123717296	C12orf65	0.0171628	0.313677	0.296514	17	0.00272278	11.171	1098.14	1308.61	0.253381	0.0398671	TRUE	FALSE	Upregulated
chr12:64615340-64616116	C12orf66	0.017401	0.260216	0.242815	47	0.00809614	9.54143	1287.18	849.407	-0.599839	1.12039e-09	TRUE	FALSE	Downregulated
chr12:104350053-104350814	C12orf73	0.0557785	0.410681	0.354903	37	0.000500314	14.5384	886.205	713.282	-0.313654	0.00746209	FALSE	FALSE	Downregulated
chr14:76127619-76128061	C14orf1	0.00383877	0.323359	0.319521	36	0.000271378	17.3226	3674.45	5049.32	0.458444	5.98796e-05	FALSE	FALSE	Upregulated
chr14:23563715-23564109	C14orf119	0.00312718	0.231944	0.228817	33	0.00687629	9.77312	4959.2	7082.77	0.51436	1.20579e-07	FALSE	FALSE	Upregulated
chr14:93673517-93674517	C14orf142	0.00603551	0.350884	0.344849	54	0.000271378	15.8902	1515.91	1310.58	-0.210414	0.0756905	FALSE	TRUE	NoDiff.
chr14:52456350-52456855	C14orf166	0.00247962	0.221282	0.218802	33	0.00340365	10.6722	7882.48	5795.96	-0.443529	2.41273e-07	TRUE	TRUE	Downregulated
chr14:45366477-45367330	C14orf28	0.0102501	0.263018	0.252768	77	0.000271378	16.6604	544.189	427.396	-0.347455	0.0578306	TRUE	FALSE	NoDiff.
chr14:105452259-105452967	C14orf79	0.0407043	0.273065	0.232361	48	0.00272278	11.3718	732.759	945.98	0.369757	0.0180139	FALSE	FALSE	Upregulated
chr14:105955990-105956678	C14orf80	0.00794645	0.510773	0.502826	47	0.000791136	13.4465	2088.95	882.479	-1.24359	2.96602e-19	TRUE	TRUE	Downregulated
chr14:23479456-23480079	C14orf93	0.0263611	0.230766	0.204405	22	0.00718618	9.69982	1109.25	1091.2	-0.0226537	0.932369	FALSE	FALSE	NoDiff.
chr15:76351643-76352660	C15orf27	0.00446126	0.378173	0.37595	116	0.000271378	16.9867	27.9843	67.0159	1.24877	4.60082e-05	FALSE	TRUE	Upregulated
chr15:40633029-40633194	C15orf52	0.0128205	0.297512	0.284692	8	0.0208426	8.15397	293.828	1085.49	1.8854	1.58962e-45	FALSE	FALSE	Upregulated
chr15:74044686-74045574	C15orf59	0.0961828	0.466626	0.370443	123	0.000668406	14.2023	93.2519	23.3913	-1.99129	1.26944e-05	TRUE	TRUE	Downregulated
chr15:55700294-55700354	C15orf65	0	0.20435	0.20435	5	0.0361104	7.47526	59.8612	213.324	1.84246	1.53612e-07	FALSE	FALSE	Upregulated
chr16:685418-686342	C16orf13	0.0213316	0.28548	0.264149	81	0.000791136	13.4437	1962.9	790.924	-1.31178	1.7674e-26	FALSE	FALSE	Downregulated
chr16:15528315-15529413	C16orf45	0.00771723	0.346324	0.338607	74	0.000271378	15.2601	419.325	223.492	-0.911075	5.42415e-05	FALSE	FALSE	Downregulated
chr16:22018867-22020742	C16orf52	0.0204627	0.422223	0.399064	158	0.000271378	23.6266	1185.07	737.926	-0.682222	3.06791e-06	TRUE	TRUE	Downregulated
chr16:31519000-31519548	C16orf58	0.0294598	0.308886	0.279427	28	0.0137576	8.69671	4349.85	3982.58	-0.126923	0.2819	FALSE	FALSE	NoDiff.
chr16:9184806-9185144	C16orf72	0.00702082	0.26014	0.253119	23	0.00669853	9.79223	6211.61	4444.75	-0.483017	7.78496e-07	FALSE	TRUE	Downregulated
chr16:85783514-85784947	C16orf74	0.0158938	0.366756	0.350862	140	0.000271378	23.664	344.822	225.036	-0.619342	0.000347837	FALSE	TRUE	Downregulated
chr16:46864454-46865182	C16orf87	0.00103093	0.244659	0.246242	84	0.0165459	8.44599	517.83	591.942	0.191159	0.15995	FALSE	FALSE	NoDiff.
chr17:42733351-42733614	C17orf104	0.0704023	0.318795	0.248392	17	0.0404264	7.33475	35.6947	60.3394	0.752366	0.0324709	FALSE	FALSE	Upregulated
chr17:65989924-65990583	C17orf58	0.0087934	0.542604	0.53381	53	0.000271378	23.2173	1739.07	3330.16	0.937975	1.79491e-08	FALSE	TRUE	Upregulated
chr17:54910364-54912307	C17orf67	0.00719789	0.22826	0.221062	223	0.000271378	24.3935	458.246	295.45	-0.633699	0.00088157	FALSE	FALSE	Downregulated
chr17:30668272-30669246	C17orf75	0.037045	0.356453	0.319409	46	0.00111136	12.7419	866.561	595.176	-0.543038	4.4178e-07	FALSE	FALSE	Downregulated
chr17:71227395-71229559	C17orf80	0.0147007	0.214885	0.200185	137	0.000668406	13.8021	1837.5	2937.17	0.676633	2.42145e-21	FALSE	FALSE	Upregulated
chr17:59486766-59487291	C17orf82	0.224645	0.450636	0.225991	58	0.00163634	12.6358	402.299	313.351	-0.359474	0.00807934	FALSE	TRUE	Downregulated
chr17:3748700-3749470	C17orf85	0.00843071	0.32324	0.313516	51	0.00770788	9.62215	3792.08	3736.43	-0.0215566	0.849698	FALSE	FALSE	NoDiff.
chr17:36830197-36831267	C17orf96	0.00518303	0.263773	0.260355	129	0.00969814	9.09696	624.548	475.319	-0.395195	0.113584	FALSE	FALSE	NoDiff.
chr18:33551945-33552485	C18orf21	0.0212372	0.249585	0.228348	38	0.00220229	11.9632	766.609	590.72	-0.375415	0.00404821	FALSE	FALSE	Downregulated
chr18:43753163-43753626	C18orf25	0.0671062	0.331255	0.291361	29	0.00234522	11.8368	1831.98	2584.6	0.496324	1.87638e-06	FALSE	FALSE	Upregulated
chr18:47012813-47013706	C18orf32	0.0161353	0.221967	0.205832	61	0.0189501	8.29058	996.082	789.108	-0.335615	0.00586678	FALSE	FALSE	Downregulated
chr18:51883671-51884875	C18orf54	0.036044	0.272025	0.247575	78	0.00238362	11.74	559.289	772.78	0.465259	0.00157869	FALSE	FALSE	Upregulated
chr18:74203739-74208467	C18orf65	0.00664256	0.339521	0.329944	340	0.000271378	26.6282	62.1924	20.8573	-1.56508	8.88886e-05	TRUE	TRUE	Downregulated
chr19:1236289-1238238	C19orf26	0.147323	0.485104	0.334357	219	0.00320424	10.8511	91.7442	35.1392	-1.39538	0.000280215	FALSE	TRUE	Downregulated
chr19:40853717-40854469	C19orf47	0.00321199	0.298179	0.294967	59	0.00499677	10.2741	507.036	305.481	-0.733119	3.54884e-05	TRUE	FALSE	Downregulated
chr19:11038510-11039171	C19orf52	0.0590899	0.324503	0.265413	38	0.000791136	13.1818	1394.3	1292.05	-0.110043	0.402609	FALSE	TRUE	NoDiff.
chr19:10196697-10197079	C19orf66	0.0203627	0.297912	0.277549	52	0.0706185	6.60345	102.739	60.0114	-0.77545	0.0124817	TRUE	TRUE	Downregulated
chr19:48673731-48674858	C19orf68	0.14224	0.582292	0.441922	55	0.00220229	12.0642	1207.08	626.81	-0.945975	1.44742e-14	FALSE	TRUE	Downregulated
chr19:49621779-49622200	C19orf73	0.0236516	0.291616	0.267965	29	0.00863662	9.30605	61.2521	84.8974	0.468607	0.0951786	FALSE	FALSE	NoDiff.
chr7:7221777-7223317	C1GALT1	0.0106472	0.281682	0.271035	125	0.000271378	21.5881	598.111	833.518	0.47773	0.000183458	TRUE	TRUE	Upregulated
chr12:49730687-49731135	C1QL4	0.035582	0.347704	0.312122	38	0.00191034	12.4881	10.7316	82.2397	2.91988	1.77944e-08	FALSE	TRUE	Upregulated
chr22:37583733-37585549	C1QTNF6	0.185774	0.600386	0.415926	25	0.00376152	10.6301	1875.56	1522.78	-0.300102	0.154261	TRUE	TRUE	NoDiff.
chr1:200860148-200860882	C1orf106	0.262456	0.564724	0.302268	61	0.0473748	7.13299	266.324	480.675	0.849828	0.00152365	FALSE	FALSE	Upregulated
chr1:200862579-200862916	C1orf106	0.447115	0.754521	0.307406	5	0.0227192	8.05958	266.324	480.675	0.849828	0.00152365	FALSE	FALSE	Upregulated
chr1:220863533-220864047	C1orf115	0.0169974	0.395652	0.378655	65	0.000959715	13.0258	589.684	569.451	-0.0508944	0.776114	TRUE	FALSE	NoDiff.
chr1:53685820-53686211	C1orf123	0	0.235535	0.235535	29	0.0654221	6.70613	1569.05	1443.83	-0.119567	0.247126	FALSE	FALSE	NoDiff.
chr1:228400711-228401572	C1orf145	0.0444367	0.426297	0.379897	65	0.000791136	13.5156	276.469	89.4432	-1.62479	5.85529e-11	TRUE	TRUE	Downregulated
chr1:109656495-109657186	C1orf194	0.0262857	0.397159	0.370873	45	0.000959715	13.0204	63.1069	116.132	0.882107	0.0047377	FALSE	FALSE	Upregulated
chr1:231004592-231005092	C1orf198	0.0522412	0.289226	0.236985	28	0.00320424	10.8235	2369.89	2329.67	-0.0251091	0.824912	FALSE	FALSE	NoDiff.
chr1:184355491-184356907	C1orf21	0.00978079	0.478435	0.469962	137	0.000271378	19.2153	3593.49	1029.42	-1.80308	4.69477e-46	FALSE	TRUE	Downregulated
chr1:43750893-43751504	C1orf210	0.0340686	0.258263	0.224194	16	0.020207	8.19389	505.524	352.538	-0.521494	0.000648922	FALSE	FALSE	Downregulated
chr1:36183586-36184978	C1orf216	0.0404632	0.338179	0.297716	88	0.000791136	13.5461	965.978	977.278	0.0158495	0.941422	FALSE	FALSE	NoDiff.
chr1:178511834-178512855	C1orf220	0.0642823	0.405629	0.341347	65	0.000791136	13.4798	242.141	147.002	-0.716727	1.76913e-05	FALSE	FALSE	Downregulated
chr1:154193647-154194355	C1orf43	0.0116028	0.408966	0.397363	39	0.000271378	15.8588	13704.3	14993.9	0.129829	0.179713	TRUE	TRUE	NoDiff.
chr1:85724328-85725278	C1orf52	0.00651891	0.216024	0.20714	60	0.0184623	8.3177	1175.4	1509.58	0.36155	0.00218625	FALSE	FALSE	Upregulated
chr1:151020118-151020626	C1orf56	0.00209234	0.228994	0.226901	50	0.000500314	14.6822	1042.79	750.178	-0.47475	6.75665e-06	FALSE	FALSE	Downregulated
chr6:31864666-31865794	C2	0.0282822	0.352556	0.325119	97	0.000271378	16.1708	111.262	114.496	0.0367952	0.91165	FALSE	TRUE	NoDiff.
chr21:45758346-45758598	C21orf2	0.0397025	0.27614	0.236438	13	0.0726261	6.5648	1806.19	2200.06	0.284356	0.00412437	TRUE	TRUE	Upregulated
chr21:47738093-47738466	C21orf58	0.208909	0.497233	0.288324	9	0.0697349	6.62274	2630.32	1592.7	-0.723672	1.87998e-09	FALSE	FALSE	Downregulated
chr21:47744787-47745725	C21orf58	0.0300738	0.415965	0.385891	75	0.000271378	18.4246	2630.32	1592.7	-0.723672	1.87998e-09	FALSE	FALSE	Downregulated
chr22:32339913-32342332	C22orf24	0.0169835	0.288365	0.268051	188	0.000271378	18.3582	26.2486	60.5779	1.2033	0.00162997	FALSE	TRUE	Upregulated
chr22:19842964-19843570	C22orf29	0.0391293	0.270377	0.231248	24	0.00384605	10.586	1864.64	5291.94	1.505	5.11207e-91	FALSE	FALSE	Upregulated
chr21:43374021-43374388	C2CD2	0.0188131	0.284714	0.268153	56	0.00828857	9.42082	712.534	1075.84	0.593944	3.12427e-09	TRUE	FALSE	Upregulated
chr11:118977556-118978707	C2CD2L	0.0319041	0.271474	0.23957	102	0.000668406	13.7424	1625.18	2426.15	0.577914	6.66262e-12	FALSE	FALSE	Upregulated
chr11:73882526-73883233	C2CD3	0.0325074	0.327066	0.294559	16	0.00462779	10.3821	2349.8	3860.32	0.715629	5.37805e-14	TRUE	FALSE	Upregulated
chr19:408716-410267	C2CD4C	0.0675146	0.360858	0.301838	117	0.00248077	11.5265	94.8924	71.7439	-0.40762	0.422836	TRUE	TRUE	NoDiff.
chr12:22696781-22697799	C2CD5	0.00492668	0.250891	0.247306	93	0.0057678	10.1206	2876.02	2232.31	-0.365129	0.0193531	TRUE	TRUE	Downregulated
chr2:241836246-241836552	C2orf54	0.103632	0.546355	0.442723	13	0.0268594	7.8404	77.7819	212.684	1.4573	3.77525e-11	FALSE	TRUE	Upregulated
chr2:231902027-231902846	C2orf72	0.0149831	0.260261	0.264668	132	0.00444491	10.4303	33.8072	55.2864	0.710137	0.0850331	TRUE	FALSE	NoDiff.
chr2:120124775-120125428	C2orf76	0.0079875	0.461027	0.453039	44	0.000271378	14.8727	786.702	817.25	0.0555233	0.692039	FALSE	FALSE	NoDiff.
chr3:112737979-112738560	C3orf17	0.00524515	0.26708	0.261835	49	0.0340947	7.5518	2849.06	2159.46	-0.399453	0.00119675	FALSE	FALSE	Downregulated
chr3:111805163-111805852	C3orf52	0.0961817	0.314525	0.218343	48	0.00797866	9.59956	231.914	179.746	-0.366678	0.165408	TRUE	FALSE	NoDiff.
chr3:143690197-143691171	C3orf58	0.0121165	0.357202	0.345085	96	0.000271378	15.2226	1749.41	1001.19	-0.805561	9.03411e-14	FALSE	TRUE	Downregulated
chr3:184870594-184871524	C3orf70	0.0907308	0.293932	0.203201	117	0.0057678	10.1007	61.4421	109.07	0.828036	0.000776073	TRUE	FALSE	Upregulated
chr4:37454733-37456769	C4orf19	0.0513937	0.321442	0.270048	93	0.000271378	16.2379	729.1	793.714	0.123398	0.538062	TRUE	FALSE	NoDiff.
chr4:128886603-128887120	C4orf29	0	0.314128	0.314128	41	0.000271378	16.0534	853.033	1178.96	0.46761	1.17707e-05	FALSE	TRUE	Upregulated
chr4:120221357-120221805	C4orf3	0.0130923	0.234191	0.221098	27	0.00177479	12.5534	4210.54	6081.71	0.530573	5.03234e-10	FALSE	FALSE	Upregulated
chr4:2042651-2043086	C4orf48	0.137737	0.532875	0.383207	38	0.0924667	6.24849	1338.55	1545.88	0.207241	0.482702	FALSE	FALSE	NoDiff.
chr5:134181593-134182417	C5orf24	0.00512617	0.290389	0.285263	85	0.000271378	18.6328	4238.97	3982.15	-0.0899653	0.48383	TRUE	FALSE	NoDiff.
chr5:102593820-102595672	C5orf30	0.0163191	0.388867	0.372112	157	0.000271378	18.5362	1623.78	570.603	-1.50833	2.61457e-24	FALSE	TRUE	Downregulated
chr5:2751375-2754151	C5orf38	0.0856669	0.380891	0.295224	230	0.000271378	21.8584	631.479	378.803	-0.735855	9.98606e-06	TRUE	TRUE	Downregulated
chr5:37249038-37249818	C5orf42	0.062792	0.381861	0.319069	88	0.000271378	15.1478	1312.71	309.803	-2.08205	3.10333e-73	FALSE	FALSE	Downregulated
chr5:134369017-134370381	C5orf66	0.0445982	0.443142	0.396898	158	0.000271378	22.432	465.564	265.604	-0.809276	3.32318e-10	FALSE	TRUE	Downregulated
chr6:34663778-34664716	C6orf106	0.0211974	0.35648	0.334054	65	0.00191034	12.4519	5749.69	3629.1	-0.664127	5.43793e-06	FALSE	FALSE	Downregulated
chr6:42109886-42110709	C6orf132	0.0930554	0.587124	0.493812	67	0.0340569	7.55877	909.833	175.023	-2.37787	1.19267e-33	TRUE	TRUE	Downregulated
chr6:30614722-30615366	C6orf136	0.00785714	0.286503	0.278646	68	0.00621285	10.0009	998.687	551.638	-0.856918	1.60584e-07	TRUE	TRUE	Downregulated
chr6:49517997-49519839	C6orf141	0.0362533	0.36095	0.324696	89	0.000271378	21.2992	3202.9	1997.48	-0.680895	1.87895e-05	FALSE	FALSE	Downregulated
chr6:24719705-24720818	C6orf62	0.00233281	0.274974	0.272641	64	0.000271378	15.4087	8599.27	8439.41	-0.0271694	0.818325	FALSE	FALSE	NoDiff.
chr6:159290374-159290709	C6orf99	0.0193683	0.356664	0.337296	19	0.0272952	7.82669	109.179	124.608	0.189878	0.421044	FALSE	FALSE	NoDiff.
chr7:99756492-99756951	C7orf43	0.105624	0.320553	0.21493	14	0.0517437	7.02754	1896.42	2024.22	0.0937405	0.499309	FALSE	FALSE	NoDiff.
chr7:112579222-112579829	C7orf60	0.00686652	0.339134	0.332268	42	0.00340365	10.659	665.633	407.255	-0.708188	1.32382e-06	FALSE	FALSE	Downregulated
chr7:135347357-135347818	C7orf73	0.00618531	0.221418	0.215233	32	0.0031528	10.9062	5187.74	4343.1	-0.256527	0.00514675	FALSE	FALSE	Downregulated
chr8:146277020-146277308	C8orf33	0.0157235	0.247862	0.232138	20	0.00818561	9.475	3319.02	2043.51	-0.699865	1.78979e-16	TRUE	FALSE	Downregulated
chr8:96281251-96281746	C8orf37	0.00376336	0.225551	0.221787	45	0.000668406	14.1821	552.044	642.034	0.219976	0.13055	TRUE	FALSE	NoDiff.
chr8:96281251-96281746	C8orf37-AS1	0.00376336	0.225551	0.221787	45	0.000668406	14.1821	38.2206	168.001	2.14082	1.09938e-16	FALSE	FALSE	Upregulated
chr8:67578143-67580131	C8orf44	0.0225475	0.238672	0.216125	100	0.000791136	13.1084	233.518	136.052	-0.775063	3.18743e-05	FALSE	TRUE	Downregulated
chr8:22455718-22456563	C8orf58	0.142249	0.584946	0.442697	51	0.00248077	11.4793	236.2	152.134	-0.637222	0.00137451	FALSE	TRUE	Downregulated
chr8:124252970-124253506	C8orf76	0.00776987	0.208591	0.200821	45	0.000271378	15.2466	903.465	1198.73	0.407602	5.02303e-05	FALSE	FALSE	Upregulated
chr9:132082691-132083793	C9orf106	0.101244	0.479535	0.378291	61	0.000271378	15.2016	276.611	134.523	-1.03721	3.43922e-06	FALSE	TRUE	Downregulated
chr9:131592273-131592489	C9orf114	0.010398	0.252019	0.241621	5	0.0386138	7.40399	4661.93	5114.98	0.133537	0.389944	FALSE	FALSE	NoDiff.
chr9:139920030-139920486	C9orf139	0.0355346	0.4495	0.413966	22	0.0084827	9.35893	83.872	101.056	0.271207	0.25937	TRUE	TRUE	NoDiff.
chr9:139886832-139887876	C9orf142	0.0691995	0.440976	0.371776	66	0.00340365	10.652	3503.4	1774.12	-0.981584	1.36762e-17	TRUE	TRUE	Downregulated
chr9:112969251-112970262	C9orf152	0.392623	0.750655	0.358032	12	0.0408976	7.30824	302.889	34.2176	-3.1421	8.88334e-17	TRUE	TRUE	Downregulated
chr9:139735548-139737327	C9orf172	0.0876061	0.465716	0.37811	54	0.00111136	12.9341	251.153	604.588	1.26567	6.19686e-18	TRUE	TRUE	Upregulated
chr9:140148732-140149385	C9orf173-AS1	0.0320439	0.258141	0.226097	43	0.00218775	12.3563	171.454	174.634	0.0269819	0.919069	TRUE	FALSE	NoDiff.
chr9:77566687-77567630	C9orf40	0.00330033	0.222286	0.223529	103	0.01075	8.93946	386.579	257.624	-0.587482	0.0153924	FALSE	FALSE	Downregulated
chr9:77642658-77643373	C9orf41	0.00287356	0.264608	0.265643	92	0.00678448	9.78061	399.467	361.826	-0.142998	0.473354	FALSE	FALSE	NoDiff.
chr9:116171972-116172923	C9orf43	0.00547721	0.265668	0.260191	60	0.000271378	14.7967	102.223	79.1149	-0.367099	0.372337	TRUE	FALSE	NoDiff.
chr9:86571814-86572122	C9orf64	0.00637986	0.260755	0.254375	23	0.0262648	7.87055	1448.06	1341.02	-0.109835	0.332288	TRUE	FALSE	NoDiff.
chr9:74525047-74525948	C9orf85	0.0053876	0.289613	0.277791	95	0.00635215	9.85847	243.438	296.095	0.285164	0.374348	FALSE	FALSE	NoDiff.
chr9:135753287-135753661	C9orf9	0.0329294	0.264958	0.231017	44	0.0116262	8.85789	92.7134	81.5233	-0.177638	0.625954	FALSE	FALSE	NoDiff.
chr19:49148251-49150118	CA11	0.0361225	0.673139	0.637017	65	0.000271378	17.9659	867.351	129.375	-2.7412	1.45995e-70	TRUE	TRUE	Downregulated
chr15:63671303-63674389	CA12	0.1016	0.45913	0.35753	87	0.000271378	15.4732	9718.06	4886.71	-0.991954	1.42549e-13	TRUE	FALSE	Downregulated
chr8:86157764-86158410	CA13	0.0175949	0.342881	0.325286	49	0.000271378	17.197	26.044	150.121	2.53426	1.64599e-12	FALSE	FALSE	Upregulated
chr8:86375968-86377015	CA2	0.0197455	0.483702	0.463956	110	0.000271378	22.7384	5547.73	614.287	-3.17503	1.262e-93	TRUE	TRUE	Downregulated
chr8:86375968-86377015	CA3-AS1	0.0197455	0.483702	0.463956	110	0.000271378	22.7384	92.3569	12.5275	-2.8761	1.11805e-10	TRUE	TRUE	Downregulated
chrX:15756392-15757201	CA5B	0.0152588	0.271305	0.256046	38	0.000668406	14.2801	984.476	1431.05	0.540585	0.0335172	TRUE	FALSE	Upregulated
chr8:61193219-61194149	CA8	0.00446153	0.306666	0.302183	101	0.000271378	16.0356	408.305	164.381	-1.31371	7.05139e-12	TRUE	FALSE	Downregulated
chr18:20715093-20716392	CABLES1	0.0025641	0.286823	0.284171	197	0.000271378	20.3573	1576.3	936.414	-0.751067	1.29529e-09	FALSE	FALSE	Downregulated
chr1:64935654-64936573	CACHD1	0.00907032	0.368007	0.354592	112	0.000271378	17.1752	264.747	98.9594	-1.42259	2.51412e-07	TRUE	FALSE	Downregulated
chr1:64971267-64971847	CACHD1	0.0132504	0.620003	0.634378	43	0.00111136	12.7632	264.747	98.9594	-1.42259	2.51412e-07	TRUE	TRUE	Downregulated
chr3:53527707-53529523	CACNA1D	0.0665482	0.353065	0.313295	176	0.00635215	9.85376	377.83	508.782	0.431566	0.106285	FALSE	TRUE	NoDiff.
chr16:1202389-1202541	CACNA1H	0.0639927	0.487646	0.423653	17	0.0962699	6.19705	4031	3243.43	-0.314005	0.0263566	TRUE	TRUE	Downregulated
chr3:50540221-50541303	CACNA2D2	0.0342433	0.386862	0.356506	140	0.000500314	14.4968	367.911	1044.8	1.50633	7.80422e-22	FALSE	FALSE	Upregulated
chr17:37353093-37354201	CACNB1	0.0016129	0.376993	0.356404	89	0.0082215	9.44494	324.471	81.446	-1.9942	1.6935e-23	TRUE	TRUE	Downregulated
chr10:18429175-18430612	CACNB2	0.206095	0.485129	0.279034	134	0.0091267	9.1776	75.0459	138.935	0.88989	0.000900956	FALSE	TRUE	Upregulated
chr10:18689471-18689948	CACNB2	0.0647387	0.377753	0.313014	17	0.024061	7.97685	75.0459	138.935	0.88989	0.000900956	FALSE	FALSE	Upregulated
chr12:49207990-49209804	CACNB3	0.0312955	0.516471	0.485175	127	0.000271378	26.7962	2858.66	824.1	-1.79489	7.61347e-26	FALSE	TRUE	Downregulated
chr12:49211737-49212892	CACNB3	0.0109276	0.602314	0.591692	103	0.000271378	30.434	2858.66	824.1	-1.79489	7.61347e-26	FALSE	TRUE	Downregulated
chr2:152954451-152956343	CACNB4	0.0857428	0.539198	0.453456	136	0.000271378	26.756	41.1242	295.443	2.85759	1.75144e-19	FALSE	TRUE	Upregulated
chr17:64958912-64962595	CACNG4	0.12704	0.513269	0.383895	254	0.000271378	32.5716	8707.78	1190.57	-2.87069	8.42223e-90	TRUE	TRUE	Downregulated
chr2:27440302-27440957	CAD	0.00296711	0.267076	0.264109	45	0.000791136	13.6357	9909.27	6721.1	-0.56018	5.70834e-05	TRUE	FALSE	Downregulated
chr11:115373757-115375065	CADM1	0.00819865	0.459121	0.458701	111	0.000271378	16.7657	2158.69	1587.49	-0.443068	0.00127534	TRUE	TRUE	Downregulated
chr19:44144121-44144547	CADM4	0.0247902	0.343862	0.319072	39	0.000791136	13.5515	794.04	758.349	-0.0676375	0.785448	TRUE	FALSE	NoDiff.
chr7:122525524-122526875	CADPS2	0.0229683	0.403364	0.380396	128	0.000271378	20.991	1001.66	612.521	-0.71057	1.3551e-06	FALSE	TRUE	Downregulated
chr7:93203771-93205402	CALCR	0.0113849	0.352223	0.339203	75	0.000271378	19.5809	707.457	216.167	-1.70942	4.33848e-20	TRUE	FALSE	Downregulated
chr10:105211753-105212305	CALHM2	0.0488784	0.467664	0.418785	36	0.000271378	15.6402	1025.9	685.597	-0.581397	2.12262e-05	FALSE	TRUE	Downregulated
chr14:90863521-90866423	CALM1	0.0567579	0.485109	0.426228	154	0.000271378	23.5832	39310.4	15246.2	-1.36649	2.96058e-24	FALSE	TRUE	Downregulated
chr2:47402810-47403710	CALM2	0.00330879	0.340599	0.336424	92	0.000271378	23.4999	32021.5	21258	-0.590989	3.27189e-09	TRUE	FALSE	Downregulated
chr10:12390866-12392333	CAMK1D	0.058211	0.417548	0.361297	184	0.000271378	24.9419	702.247	105.221	-2.73742	4.38452e-32	FALSE	TRUE	Downregulated
chr7:44364689-44366086	CAMK2B	0.0439849	0.279963	0.23747	146	0.000668406	13.9373	1047.8	2711.87	1.37164	8.68255e-22	TRUE	TRUE	Upregulated
chr4:114681398-114684122	CAMK2D	0.00440428	0.484626	0.475141	170	0.000271378	24.3023	1160.69	173.403	-2.74142	3.08851e-37	TRUE	TRUE	Downregulated
chr1:20810839-20813510	CAMK2N1	0.0132338	0.535665	0.514305	269	0.000271378	24.4289	1067.32	145.263	-2.87427	9.45393e-87	FALSE	TRUE	Downregulated
chr3:183978080-183979998	CAMK2N2	0.0373437	0.457621	0.418926	167	0.000271378	20.7823	125.583	97.9323	-0.361999	0.443806	FALSE	TRUE	NoDiff.
chr17:3795481-3796909	CAMKK1	0.0293614	0.38947	0.371248	164	0.000271378	16.5691	235.043	130.565	-0.849728	0.000307505	FALSE	TRUE	Downregulated
chr12:121733425-121735213	CAMKK2	0.0121233	0.406608	0.397223	162	0.000271378	23.3012	3817.3	1285.65	-1.57035	1.54769e-43	FALSE	TRUE	Downregulated
chr2:44587979-44588624	CAMKMT	0.00843572	0.209936	0.2015	23	0.00863662	9.2961	365.523	599.729	0.714444	6.29837e-08	TRUE	FALSE	Upregulated
chr9:138797952-138799225	CAMSAP1	0.00575664	0.243906	0.246074	133	0.000271378	15.7064	3968.25	2901.76	-0.451997	1.65641e-06	FALSE	FALSE	Downregulated
chr1:200707864-200709284	CAMSAP2	0.00367092	0.46246	0.458789	135	0.000271378	35.3878	6723.05	2628.92	-1.35489	5.81771e-63	FALSE	TRUE	Downregulated
chr17:4889444-4891246	CAMTA2	0.080112	0.474706	0.394594	99	0.000271378	16.2486	2899.41	948.754	-1.61181	2.00453e-45	TRUE	TRUE	Downregulated
chr6:17392982-17394562	CAP2	0.0440271	0.519498	0.510396	92	0.000668406	13.7811	2173.3	189.407	-3.52108	7.86861e-75	TRUE	TRUE	Downregulated
chr11:64948346-64951536	CAPN1	0.100922	0.47606	0.375138	153	0.000271378	22.5601	11414.8	5445.27	-1.0678	1.37159e-27	FALSE	TRUE	Downregulated
chr2:241526541-241526962	CAPN10-AS1	0.0116734	0.24537	0.233697	28	0.00280792	11.0234	314.132	342.957	0.128021	0.377288	FALSE	FALSE	NoDiff.
chr11:76777526-76778589	CAPN5	0.0100555	0.211501	0.201446	94	0.000959715	13.0229	871.792	5451.64	2.64503	3.2127e-161	FALSE	TRUE	Upregulated
chr3:15247891-15248319	CAPN7	0.000888099	0.259536	0.258648	57	0.000791136	13.4872	3918.18	3987.33	0.0253194	0.785448	FALSE	FALSE	NoDiff.
chr12:30907071-30907879	CAPRIN2	0.012167	0.376613	0.364446	73	0.000668406	14.2843	542.685	475.59	-0.189425	0.321396	FALSE	FALSE	NoDiff.
chr12:75784444-75784921	CAPS2	0.0108502	0.426601	0.415751	16	0.000271378	14.9578	134.879	152.212	0.178806	0.527565	FALSE	TRUE	NoDiff.
chr1:113161411-113162028	CAPZA1	0	0.243214	0.243214	38	0.00220229	11.9017	12568.5	14708.8	0.22682	0.0116321	FALSE	FALSE	Upregulated
chr1:19810909-19811485	CAPZB	0.0333811	0.452797	0.419416	31	0.000500314	14.3888	7131.85	6545.83	-0.123835	0.441075	FALSE	FALSE	NoDiff.
chr22:37914769-37915650	CARD10	0.0144404	0.364733	0.389998	112	0.00238362	11.638	425.173	250.065	-0.767462	0.00569669	FALSE	FALSE	Downregulated
chr17:78143645-78144039	CARD14	0.0427866	0.377683	0.334897	15	0.0239594	7.98248	825.697	1141.46	0.467557	3.49543e-05	TRUE	FALSE	Upregulated
chr2:203777086-203777914	CARF	0.0537193	0.388031	0.334312	48	0.00935241	9.14777	1042.23	503.641	-1.04765	1.62934e-06	FALSE	TRUE	Downregulated
chr16:8961648-8963334	CARHSP1	0.0100179	0.514892	0.504874	120	0.000271378	27.0774	4915.88	2629.15	-0.903081	2.62789e-07	FALSE	TRUE	Downregulated
chr19:10981199-10981559	CARM1	0.104832	0.35311	0.248278	13	0.0181667	8.34023	5260.51	5213.88	-0.0131197	0.904795	FALSE	FALSE	NoDiff.
chr11:67182844-67183258	CARNS1	0.0500672	0.41969	0.369623	48	0.00518925	10.2372	369.512	679.118	0.877101	1.09233e-08	TRUE	FALSE	Upregulated
chr10:119805232-119806418	CASC2	0.0690211	0.416339	0.344455	80	0.00191034	12.4454	117.22	100.119	-0.227832	0.357465	FALSE	TRUE	NoDiff.
chr17:38296520-38297582	CASC3	0.0260445	0.270174	0.241594	69	0.00946703	9.12513	4395.04	4920.88	0.163163	0.054066	TRUE	FALSE	NoDiff.
chr15:44581068-44581729	CASC4	0.0018797	0.304355	0.304188	46	0.00904836	9.20091	3608.3	4296.74	0.25225	0.0104357	FALSE	FALSE	Upregulated
chr7:94138869-94139832	CASD1	0.00194049	0.432637	0.430696	99	0.000271378	21.5112	1327.85	292.06	-2.18455	8.73373e-33	TRUE	FALSE	Downregulated
chrX:41781687-41783139	CASK	0.0243289	0.42118	0.421392	171	0.000271378	16.4224	2849.77	1378.4	-1.04797	1.64621e-25	TRUE	TRUE	Downregulated
chr16:2245720-2246763	CASKIN1	0.027838	0.512589	0.476673	127	0.000271378	19.7588	307.449	62.1832	-2.30998	2.16539e-22	FALSE	TRUE	Downregulated
chr17:73510157-73513994	CASKIN2	0.0447484	0.374545	0.329722	268	0.000271378	28.7827	3185.25	3175.63	-0.00476057	0.968243	FALSE	TRUE	NoDiff.
chr7:142985713-142986705	CASP2	0.125762	0.406241	0.280479	34	0.000791136	13.3266	4192.65	2716.23	-0.626619	1.17623e-07	FALSE	FALSE	Downregulated
chr2:202122649-202123538	CASP8	0.189189	0.566391	0.377202	18	0.0396058	7.3534	954.658	1330.49	0.479978	0.000154541	FALSE	FALSE	Upregulated
chr1:15851763-15852346	CASP9	0.0312297	0.250694	0.219465	19	0.0121866	8.80079	343.372	947.909	1.46448	1.49067e-41	FALSE	FALSE	Upregulated
chr5:95997355-95998320	CAST	0.0389449	0.419405	0.38046	72	0.000668406	13.7144	4849.92	9360.66	0.948763	2.84143e-14	TRUE	TRUE	Upregulated
chr5:96038306-96039125	CAST	0.0125541	0.262223	0.249669	64	0.00220229	12.1224	4849.92	9360.66	0.948763	2.84143e-14	TRUE	FALSE	Upregulated
chr11:34460573-34461028	CAT	0.0277072	0.278846	0.251139	30	0.00207279	12.3887	2175.92	2088.38	-0.0586918	0.717688	FALSE	FALSE	NoDiff.
chr15:44039022-44039486	CATSPER2P1	0	0.22718	0.22718	20	0.00920813	9.17007	62.2091	42.3807	-0.546603	0.224192	FALSE	FALSE	NoDiff.
chr19:38826496-38827205	CATSPERG	0.0015674	0.456226	0.454659	53	0.000271378	17.0573	861.048	1595.27	0.890555	1.27786e-06	FALSE	TRUE	Upregulated
chr7:116164436-116166755	CAV1	0.021937	0.292965	0.271028	157	0.000271378	16.9893	2056.05	377.649	-2.44441	7.98892e-12	TRUE	FALSE	Downregulated
chr7:116139367-116139883	CAV2	0.0168779	0.373489	0.354196	56	0.000959715	12.9761	785.072	237.724	-1.72276	2.86767e-17	TRUE	FALSE	Downregulated
chr16:89005978-89008460	CBFA2T3	0.0888722	0.414507	0.323771	281	0.000271378	26.1052	4363.13	1596.5	-1.45044	4.15213e-31	TRUE	TRUE	Downregulated
chr16:67062592-67062934	CBFB	0.0128498	0.390676	0.377826	32	0.0251902	7.90906	2283.86	1908.97	-0.259192	0.0550901	TRUE	FALSE	NoDiff.
chr11:119077000-119078241	CBL	0.0289555	0.325911	0.2995	74	0.00177479	12.5221	5177.67	4307.37	-0.265683	0.0178624	FALSE	TRUE	Downregulated
chr3:105587151-105587849	CBLB	0.00309774	0.333614	0.330516	59	0.000271378	15.906	1096.01	1248.05	0.188367	0.218562	TRUE	FALSE	NoDiff.
chr7:107383331-107384074	CBLL1	0.0261167	0.295675	0.269558	32	0.00238362	11.5335	3390.01	2856.48	-0.246741	0.11152	FALSE	FALSE	NoDiff.
chr14:24898780-24901306	CBLN3	0.262038	0.510758	0.24872	113	0.00499677	10.2819	296.725	142.797	-1.05301	1.39286e-06	TRUE	TRUE	Downregulated
chr21:37529199-37529911	CBR3-AS1	0.00382234	0.283708	0.260169	73	0.00462779	10.3638	815.947	2289.01	1.48771	1.98519e-33	TRUE	TRUE	Upregulated
chr21:44495269-44496494	CBS	0.0112783	0.451392	0.437316	119	0.000271378	18.2785	5993.64	1319.66	-2.18317	1.09305e-20	TRUE	FALSE	Downregulated
chr17:46177682-46178609	CBX1	0.0262927	0.278075	0.251782	59	0.000271378	15.8807	21269.2	10962.7	-0.956205	1.21485e-14	FALSE	FALSE	Downregulated
chr17:77750946-77753084	CBX2	0.0797242	0.352357	0.274215	201	0.000271378	17.5523	4222.42	2366.44	-0.835613	1.24299e-06	FALSE	FALSE	Downregulated
chr7:26240726-26242016	CBX3	0.00332088	0.263535	0.260215	146	0.000271378	18.6373	24441.2	12656.8	-0.949458	7.6054e-22	FALSE	TRUE	Downregulated
chr17:77804944-77813846	CBX4	0.158293	0.56574	0.404848	569	0.000271378	31.9391	5028.1	1341.39	-1.90613	1.75168e-35	TRUE	TRUE	Downregulated
chr22:39266366-39268162	CBX6	0.0374604	0.400504	0.363727	88	0.0209586	8.14696	6163.58	5744.08	-0.101914	0.355113	FALSE	FALSE	NoDiff.
chr17:77770065-77771767	CBX8	0.0254763	0.359815	0.333263	156	0.000500314	14.5829	1355.59	638.19	-1.08625	1.59654e-25	TRUE	TRUE	Downregulated
chr1:52833835-52834282	CC2D1B	0.103483	0.317811	0.214328	21	0.00191034	12.4471	1679.45	1551.95	-0.114625	0.390549	FALSE	FALSE	NoDiff.
chr10:70480581-70481597	CCAR1	0.00388224	0.224037	0.220155	91	0.00444491	10.4285	6732.38	3872.7	-0.797606	1.12552e-14	TRUE	FALSE	Downregulated
chr9:131644705-131645670	CCBL1	0.0408507	0.293838	0.252988	30	0.00462779	10.3774	282.372	462.055	0.708132	0.000562215	FALSE	TRUE	Upregulated
chr1:89459325-89459897	CCBL2	0.213803	0.496337	0.282534	10	0.0510507	7.03799	816.892	1035.98	0.344134	0.00758021	TRUE	FALSE	Upregulated
chr16:57569606-57570819	CCDC102A	0.0149174	0.313411	0.330528	113	0.0233402	8.00646	135.249	78.3287	-0.79095	0.00767269	FALSE	TRUE	Downregulated
chr4:110481041-110482411	CCDC109B	0.00222773	0.244259	0.243084	110	0.000271378	16.1834	964.344	1108.6	0.200056	0.138056	FALSE	FALSE	NoDiff.
chr19:48823178-48824291	CCDC114	0.329279	0.548096	0.218817	37	0.0250743	7.92271	178.327	129.049	-0.462803	0.0819009	FALSE	FALSE	NoDiff.
chr2:131100662-131100722	CCDC115	0	0.246267	0.246267	10	0.0147213	8.6163	2178.58	2984.18	0.453537	1.26366e-07	FALSE	FALSE	Upregulated
chrX:48916466-48917693	CCDC120	0.0719587	0.277048	0.20509	22	0.0913824	6.25936	1736.1	7660.51	2.14132	4.14688e-112	TRUE	FALSE	Upregulated
chr13:44453213-44454370	CCDC122	0.00416973	0.209122	0.20581	123	0.000271378	14.9298	458.464	418.412	-0.130021	0.40545	TRUE	FALSE	NoDiff.
chr7:23636840-23638419	CCDC126	0.0641664	0.300588	0.236422	99	0.00238362	11.7159	324.23	287.902	-0.171268	0.235696	FALSE	FALSE	NoDiff.
chr7:128431363-128432002	CCDC136	0.0669651	0.553949	0.485558	61	0.00191034	12.4299	324.519	68.1897	-2.24732	6.14453e-29	FALSE	TRUE	Downregulated
chr2:159312189-159315363	CCDC148	0.0174852	0.331707	0.308775	212	0.000271378	24.1308	113.798	105.575	-0.104144	0.821282	TRUE	TRUE	NoDiff.
chr4:24913874-24914543	CCDC149	0.0196083	0.369407	0.349799	54	0.00111136	12.896	733.022	107.437	-2.76601	7.55693e-44	TRUE	FALSE	Downregulated
chr19:11455570-11456283	CCDC159	0.148164	0.373846	0.225682	16	0.0397765	7.35069	1004.83	1420.47	0.500594	0.00101347	FALSE	FALSE	Upregulated
chr2:170552019-170552665	CCDC173	0.0286916	0.270173	0.241481	11	0.0309223	7.69496	50.4742	136.616	1.43753	2.98192e-11	FALSE	FALSE	Upregulated
chr14:74484988-74485659	CCDC176	0.0128258	0.269123	0.256297	30	0.00220229	12.1158	297.117	665.462	1.1652	9.44659e-14	FALSE	FALSE	Upregulated
chr1:93644147-93646770	CCDC18	0.0216273	0.23986	0.216876	150	0.000271378	15.1181	711.341	325.986	-1.12579	1.3881e-15	FALSE	FALSE	Downregulated
chr10:115934188-115934594	CCDC186	0.00222222	0.247287	0.245065	23	0.000791136	13.5552	2181.35	6574.93	1.59223	1.18085e-45	TRUE	FALSE	Upregulated
chr1:44456778-44457837	CCDC24	0.00924055	0.229733	0.220492	74	0.011548	8.86822	361.896	412.14	0.187064	0.409782	FALSE	FALSE	NoDiff.
chr1:32665967-32666459	CCDC28B	0.0168807	0.399472	0.382793	27	0.00220229	12.1129	144.774	151.431	0.0611162	0.805941	FALSE	TRUE	NoDiff.
chr11:27384254-27384748	CCDC34	0.00901411	0.24862	0.239606	32	0.0116892	8.85383	895.758	323.42	-1.47011	1.8712e-39	TRUE	FALSE	Downregulated
chr3:180397027-180397692	CCDC39	0.00605628	0.316807	0.310751	38	0.0277425	7.81008	133.5	122.534	-0.118485	0.785479	FALSE	FALSE	NoDiff.
chr17:78010357-78011083	CCDC40	0.0212257	0.283338	0.262112	73	0.000668406	14.0208	177.515	582.649	1.71494	1.81485e-29	FALSE	FALSE	Upregulated
chr17:61851618-61852318	CCDC47	0.00218103	0.225481	0.2233	50	0.000271378	19.9272	19621.2	31489.3	0.682511	4.52012e-12	FALSE	FALSE	Upregulated
chr17:80171087-80171773	CCDC57	0.133298	0.516767	0.379524	42	0.00635215	9.97475	1490.98	2214.8	0.571863	6.15003e-07	TRUE	TRUE	Upregulated
chr3:122101572-122101898	CCDC58	0.00641026	0.250255	0.243844	9	0.0165459	8.44786	1843.25	1119.23	-0.719792	8.40067e-14	TRUE	FALSE	Downregulated
chr12:82752621-82752887	CCDC59	0.0163934	0.245276	0.228883	14	0.00499677	10.259	2075.45	1538.03	-0.43202	0.000517211	TRUE	FALSE	Downregulated
chr10:61665125-61666267	CCDC6	0.00792666	0.312566	0.299093	87	0.000271378	15.5934	5655.26	4906.69	-0.20474	0.0585506	TRUE	FALSE	NoDiff.
chr19:46498047-46498266	CCDC61	0.014632	0.270142	0.25551	6	0.0262759	7.8629	504.192	532.475	0.0795484	0.592456	FALSE	FALSE	NoDiff.
chr12:120426362-120428515	CCDC64	0.0154682	0.308423	0.296834	229	0.000271378	20.2902	1736.4	2086.58	0.265118	0.021744	TRUE	FALSE	Upregulated
chr16:3086167-3087006	CCDC64B	0.00179211	0.387032	0.38524	70	0.000271378	15.2391	903.299	1044.27	0.210115	0.0855187	TRUE	FALSE	NoDiff.
chr18:52626192-52627050	CCDC68	0.0269374	0.428622	0.401685	52	0.00191034	12.4711	121.935	96.1274	-0.347181	0.338613	TRUE	FALSE	NoDiff.
chr5:150603126-150603569	CCDC69	0.024952	0.266369	0.241417	33	0.0140717	8.65555	231.554	295.436	0.34729	0.0844791	TRUE	FALSE	NoDiff.
chr10:32735015-32736511	CCDC7	0.00878823	0.546342	0.537554	54	0.000271378	22.5381	368.572	158.27	-1.21857	2.93331e-09	FALSE	TRUE	Downregulated
chr7:106300410-106301702	CCDC71L	0.00592113	0.270112	0.26419	146	0.000271378	18.9531	555.796	464.276	-0.259525	0.0630566	FALSE	FALSE	NoDiff.
chr2:132285572-132286470	CCDC74A	0.224586	0.566167	0.339015	61	0.000668406	14.0745	1211.33	372.873	-1.70037	1.40705e-22	TRUE	TRUE	Downregulated
chr2:130902185-130902802	CCDC74B	0.0601264	0.534907	0.477554	52	0.00453586	10.3895	492.617	172.797	-1.51361	1.44506e-13	FALSE	FALSE	Downregulated
chr12:497767-498662	CCDC77	0.0230098	0.338079	0.319458	54	0.00735049	9.64705	464.377	316.247	-0.555121	0.000586931	FALSE	TRUE	Downregulated
chr3:112359488-112360393	CCDC80	0.0739341	0.318632	0.244698	10	0.0376741	7.43199	46.4503	115.848	1.32093	0.00222822	FALSE	FALSE	Upregulated
chr11:85565926-85566450	CCDC83	0.123186	0.339914	0.216728	52	0.0805703	6.41777	695.497	532.946	-0.384461	0.0649424	TRUE	FALSE	NoDiff.
chr2:56411040-56413069	CCDC85A	0.00852107	0.514902	0.506381	164	0.000271378	33.9403	412.808	65.9423	-2.64668	3.58043e-36	TRUE	TRUE	Downregulated
chr11:65655967-65657083	CCDC85B	0.0555556	0.486359	0.428254	59	0.000271378	16.279	1108.4	1103.43	-0.00745808	0.974706	FALSE	TRUE	NoDiff.
chr14:100070895-100072246	CCDC85C	0.0107787	0.279528	0.269068	108	0.000271378	22.3841	5002.38	6308.81	0.334469	0.00233625	FALSE	FALSE	Upregulated
chr2:55646538-55647248	CCDC88A	0.0895305	0.379992	0.290462	67	0.00401987	10.5083	106.234	141.566	0.412708	0.092862	FALSE	FALSE	NoDiff.
chr14:91883630-91884197	CCDC88C	0.012455	0.292875	0.28042	75	0.000500314	14.6635	2066.89	1828.05	-0.177199	0.0592376	FALSE	FALSE	NoDiff.
chr12:124455990-124458784	CCDC92	0.033028	0.482178	0.449733	280	0.000271378	27.7201	1324.44	287.037	-2.20701	3.39968e-83	TRUE	TRUE	Downregulated
chr2:118770762-118772051	CCDC93	0.00651321	0.214949	0.20808	120	0.00163634	12.6524	2659.69	2339.47	-0.185133	0.0541421	FALSE	FALSE	NoDiff.
chr19:4246676-4246875	CCDC94	0.0650763	0.362447	0.29737	9	0.0113685	8.90731	1195.22	1191.02	-0.00471385	0.974255	FALSE	TRUE	NoDiff.
chr4:7043987-7044659	CCDC96	0.0768925	0.616825	0.527233	58	0.00234522	11.8427	81.4242	58.0052	-0.489927	0.0649424	FALSE	FALSE	NoDiff.
chr19:41815062-41815508	CCDC97	0.349137	0.609145	0.260008	9	0.053804	6.96271	1912.73	2118.09	0.146901	0.134746	TRUE	FALSE	NoDiff.
chr6:31125543-31127173	CCHCR1	0.0561606	0.295679	0.239518	93	0.00218775	12.246	1703.31	844.094	-1.01352	2.53756e-11	TRUE	TRUE	Downregulated
chr6:100016115-100016838	CCNC	0.00265252	0.323135	0.320483	59	0.000271378	21.7385	3005.93	2149.47	-0.483873	1.65808e-07	TRUE	FALSE	Downregulated
chr11:69453855-69459287	CCND1	0.0097602	0.410966	0.400906	386	0.000271378	43.8848	37001.6	10994.5	-1.75086	9.20033e-95	TRUE	TRUE	Downregulated
chr6:42016244-42016730	CCND3	0.0104665	0.387016	0.376549	47	0.0247131	7.93354	1693.07	1740.57	0.0393645	0.881738	TRUE	FALSE	NoDiff.
chr19:30302974-30303782	CCNE1	0.00769822	0.266463	0.247932	106	0.00272278	11.3854	724.984	647.449	-0.163775	0.736352	TRUE	FALSE	NoDiff.
chr8:95905745-95909021	CCNE2	0.0399566	0.38343	0.343473	246	0.000271378	26.3542	3019.44	1083.64	-1.47854	0.000111776	FALSE	TRUE	Downregulated
chr16:2478275-2478703	CCNF	0.134469	0.552459	0.41799	15	0.0145778	8.62788	2520.57	2567.58	0.0261861	0.856505	FALSE	FALSE	NoDiff.
chr5:162864080-162865256	CCNG1	0.0284748	0.285342	0.256868	59	0.000271378	14.9396	4564.82	3047.73	-0.582577	0.00152022	FALSE	FALSE	Downregulated
chr4:78078551-78079590	CCNG2	0.00642741	0.451488	0.435926	93	0.000271378	17.0662	3878.88	1818.86	-1.09245	0.00149379	FALSE	TRUE	Downregulated
chr4:77996401-77997743	CCNI	0.00366655	0.456327	0.469952	125	0.000271378	18.6887	11761.7	2425.21	-2.27795	5.55079e-134	TRUE	TRUE	Downregulated
chr5:159739137-159740026	CCNJL	0.0495929	0.427471	0.361886	86	0.000271378	18.2953	137.436	54.3211	-1.34422	4.86602e-06	FALSE	FALSE	Downregulated
chr14:99946224-99946833	CCNK	0.00341714	0.324437	0.32102	66	0.00129309	12.7132	9017.35	10354.6	0.199556	0.0228718	FALSE	FALSE	Upregulated
chr3:156878195-156879083	CCNL1	0.0790959	0.380209	0.301113	38	0.000959715	13.0386	6172.48	8492.46	0.460475	0.00732209	FALSE	FALSE	Upregulated
chr5:54528048-54529084	CCNO	0.032037	0.41723	0.385193	74	0.000271378	16.2739	443.869	195.344	-1.18509	8.1545e-08	FALSE	TRUE	Downregulated
chr2:135675555-135676513	CCNT2	0.00263985	0.440716	0.438076	86	0.000271378	17.2526	3194.94	1658.45	-0.945535	3.66639e-10	FALSE	TRUE	Downregulated
chr2:135675555-135676513	CCNT2-AS1	0.00263985	0.440716	0.438076	86	0.000271378	17.2526	137.21	245.153	0.837858	5.10719e-07	TRUE	TRUE	Upregulated
chr10:35625232-35626134	CCNY	0.00381819	0.404749	0.382	144	0.000500314	14.5385	3371.06	2293.94	-0.555312	7.19067e-09	FALSE	FALSE	Downregulated
chr16:19535170-19536334	CCP110	0.0231579	0.246787	0.223629	61	0.000668406	14.171	3969.85	3212.42	-0.305434	0.00155952	FALSE	FALSE	Downregulated
chr1:229478563-229479117	CCSAP	0.00112613	0.344116	0.34299	63	0.00364727	10.6448	1603.22	1314.16	-0.287421	0.0135928	FALSE	TRUE	Downregulated
chr4:91048393-91050374	CCSER1	0.00209497	0.412238	0.405288	140	0.000271378	23.5484	298.216	192.417	-0.629581	0.000112728	FALSE	TRUE	Downregulated
chr10:86088440-86088922	CCSER2	0.0060789	0.213838	0.209458	62	0.000791136	13.507	1475.98	2327.23	0.657371	8.47455e-10	FALSE	FALSE	Upregulated
chr12:69979412-69979903	CCT2	0.00616781	0.238445	0.232277	37	0.000271378	15.8201	15200.4	11896.8	-0.353605	0.0157871	FALSE	FALSE	Downregulated
chr7:64498721-64499475	CCT6P3	0.0055482	0.2455	0.251368	81	0.000271378	15.4335	884.937	742.991	-0.251203	0.0655645	FALSE	TRUE	NoDiff.
chr6:74405564-74406060	CD109	0.00897746	0.263002	0.254025	45	0.000791136	13.1452	392.885	1209.52	1.62417	4.67826e-17	TRUE	FALSE	Upregulated
chr11:832474-833847	CD151	0.0134949	0.34049	0.29392	129	0.0218726	8.08421	6020.65	4014.41	-0.584865	2.35717e-13	TRUE	TRUE	Downregulated
chr12:6560204-6561493	CD27-AS1	0.0897385	0.512626	0.422888	34	0.000271378	16.4532	3321.15	2741.57	-0.276354	0.0485847	TRUE	TRUE	Downregulated
chr6:47445672-47446531	CD2AP	0.00322581	0.419988	0.422023	64	0.000271378	16.4503	3257.48	2788.13	-0.224755	0.00452286	FALSE	TRUE	Downregulated
chr16:30365705-30366329	CD2BP2	0.021702	0.376451	0.354749	25	0.000668406	14.1933	7717.68	8351.62	0.113722	0.240268	FALSE	TRUE	NoDiff.
chr19:45906972-45909453	CD3EAP	0.0536636	0.270104	0.216441	119	0.000271378	16.4058	1070.52	1449.13	0.435799	0.0150378	FALSE	TRUE	Upregulated
chr3:107808612-107809848	CD47	0.00657897	0.387194	0.380025	81	0.000271378	18.6132	7360.06	4505.76	-0.707831	2.07679e-13	FALSE	FALSE	Downregulated
chr1:207494472-207494896	CD55	0.0045262	0.343861	0.339335	27	0.000668406	14.241	4801.32	4363.99	-0.137575	0.586272	TRUE	FALSE	NoDiff.
chr1:117112412-117114020	CD58	0.0276651	0.374154	0.346489	119	0.000271378	19.7131	853.368	791.714	-0.107868	0.462837	TRUE	TRUE	NoDiff.
chr11:33757628-33758821	CD59	0.0845536	0.319058	0.234504	68	0.00272278	11.3916	11219.7	13778.6	0.296373	0.00111249	FALSE	FALSE	Upregulated
chr12:56121320-56124040	CD63	0.0583014	0.425709	0.368823	146	0.000500314	14.3789	18704.5	16624.7	-0.170091	0.195165	FALSE	TRUE	NoDiff.
chr6:14117344-14118444	CD83	0.0468701	0.383772	0.339761	111	0.000271378	16.2874	95.4624	80.4222	-0.246169	0.451256	FALSE	FALSE	NoDiff.
chr2:87034506-87035827	CD8A	0.0199659	0.287569	0.267603	76	0.000500314	14.3974	222.622	109.362	-1.02158	1.02988e-05	FALSE	FALSE	Downregulated
chr12:6309091-6311821	CD9	0.0921781	0.317576	0.226474	134	0.00177479	12.5888	18008.2	14349.1	-0.327621	0.0332894	FALSE	TRUE	Downregulated
chrX:150066622-150067198	CD99L2	0.00250627	0.325946	0.323439	61	0.00111136	12.8709	2988.5	2922.81	-0.0319026	0.751632	FALSE	FALSE	NoDiff.
chr1:100817690-100819048	CDC14A	0.00181486	0.32795	0.328142	99	0.000271378	15.6497	406.897	459.902	0.178469	0.251979	FALSE	FALSE	NoDiff.
chr9:99328918-99329666	CDC14B	0.00626717	0.316658	0.310391	62	0.000271378	15.2243	461.51	772.342	0.741163	2.67881e-08	TRUE	FALSE	Upregulated
chr1:43824064-43825211	CDC20	0.0147277	0.230384	0.215927	83	0.0102671	9.00597	4442.01	2474.3	-0.844423	6.09966e-08	TRUE	FALSE	Downregulated
chr20:3765056-3767370	CDC25B	0.123199	0.490497	0.367298	184	0.000271378	24.853	11663.1	3377.16	-1.78791	1.82963e-85	TRUE	TRUE	Downregulated
chr20:3776825-3778875	CDC25B	0.0539501	0.45288	0.398929	81	0.000271378	23.8627	11663.1	3377.16	-1.78791	1.82963e-85	TRUE	TRUE	Downregulated
chr5:137672613-137674808	CDC25C	0.161324	0.517364	0.354417	93	0.000271378	17.4596	1027.81	474.957	-1.11283	2.15938e-14	TRUE	TRUE	Downregulated
chr17:45265328-45266542	CDC27	0.102567	0.361936	0.259369	38	0.00770788	9.62886	5197.19	4080.78	-0.348739	0.00269076	FALSE	FALSE	Downregulated
chr19:530918-531260	CDC34	0.0164835	0.405515	0.390111	28	0.0057678	10.1177	1321.15	1364.23	0.0452469	0.77766	FALSE	FALSE	NoDiff.
chr19:10514850-10515928	CDC37	0.0106018	0.365744	0.354264	70	0.000271378	14.9569	9178.23	16077.7	0.808694	7.61626e-18	FALSE	TRUE	Upregulated
chr9:4679845-4680377	CDC37L1-AS1	0.00608607	0.234837	0.228751	22	0.0151454	8.58646	115.963	165.508	0.517226	0.0858786	FALSE	FALSE	NoDiff.
chr6:110500026-110501098	CDC40	0.00536105	0.252092	0.235352	106	0.000271378	17.013	2645.58	2150.97	-0.298504	0.00235439	FALSE	FALSE	Downregulated
chr1:227505334-227506526	CDC42BPA	0.0038016	0.329018	0.324687	119	0.000271378	14.9926	3471.52	2715.5	-0.354294	0.00108448	FALSE	FALSE	Downregulated
chr22:37956103-37957166	CDC42EP1	0.0429854	0.471978	0.460137	138	0.00248077	11.4481	250.407	129.554	-0.948729	6.07591e-05	FALSE	FALSE	Downregulated
chr17:71306976-71308751	CDC42EP4	0.00387735	0.355004	0.351126	169	0.000271378	23.1717	2074.65	2041.54	-0.0236665	0.841862	FALSE	TRUE	NoDiff.
chr1:151031615-151033077	CDC42SE1	0.0672157	0.423359	0.356143	72	0.000271378	25.7415	17328.7	14409.4	-0.266081	0.00250484	FALSE	TRUE	Downregulated
chr5:130598959-130600826	CDC42SE2	0.00352717	0.260601	0.257074	141	0.000271378	18.8018	3350.28	2781.13	-0.268633	0.00831072	FALSE	FALSE	Downregulated
chr1:91966577-91967334	CDC7	0.00151976	0.240347	0.238827	49	0.00220229	11.9658	1372.76	1405.54	0.0337023	0.867571	FALSE	FALSE	NoDiff.
chr1:193091181-193091696	CDC73	0.00419664	0.227614	0.223418	33	0.000271378	15.1395	4317.95	4798.23	0.152256	0.0709362	FALSE	FALSE	NoDiff.
chr8:25314880-25316081	CDCA2	0.0080745	0.369192	0.361118	92	0.00177479	12.5334	1997.03	1679.38	-0.250071	0.0147264	TRUE	TRUE	Downregulated
chr12:6961898-6962349	CDCA3	0	0.337195	0.337195	12	0.00969814	9.08011	1918.58	1011.67	-0.923749	1.01039e-09	TRUE	TRUE	Downregulated
chr14:105488172-105488561	CDCA4	0.0967569	0.338415	0.241658	12	0.0214407	8.12298	3976.31	2433.43	-0.708824	5.65652e-06	FALSE	FALSE	Downregulated
chr7:21984247-21985935	CDCA7L	0.00573589	0.269555	0.263819	121	0.000271378	21.0801	1386.53	668.969	-1.05167	7.70543e-12	FALSE	FALSE	Downregulated
chr16:68771230-68772697	CDH1	0.0192727	0.397354	0.376874	105	0.000271378	19.8427	59450.5	43611	-0.446976	0.00060687	TRUE	TRUE	Downregulated
chr16:89236906-89237725	CDH15	0.172421	0.490321	0.317901	38	0.000668406	14.3299	32.1407	189.531	2.5601	0.000525589	FALSE	TRUE	Upregulated
chr5:19988285-19988768	CDH18	0.0134921	0.345574	0.332082	24	0.000791136	13.1413	214.169	141.18	-0.597075	0.0045725	FALSE	TRUE	Downregulated
chr14:23525572-23527168	CDH24	0.0653807	0.483439	0.418058	114	0.000271378	22.6746	1875.13	1116.98	-0.747939	0.000803187	TRUE	TRUE	Downregulated
chr5:175969699-175971211	CDHR2	0.0335154	0.270217	0.238388	169	0.000271378	16.4697	342.09	157.575	-1.12012	5.50221e-07	FALSE	TRUE	Downregulated
chr16:29873523-29874301	CDIPT-AS1	0.0904211	0.346812	0.25639	43	0.00491337	10.2908	34.291	59.8539	0.79655	0.048167	FALSE	FALSE	Upregulated
chr17:37617911-37618498	CDK12	0.00434783	0.380517	0.37617	32	0.000500314	14.5473	4467.55	3891.69	-0.199139	0.0185897	FALSE	TRUE	Downregulated
chr7:39989156-39990862	CDK13	0.00284669	0.487355	0.48546	194	0.000271378	34.0453	3299.29	1943.32	-0.763742	1.72173e-16	FALSE	TRUE	Downregulated
chr7:90224993-90226197	CDK14	0.0289219	0.389777	0.374621	144	0.000271378	18.7351	154.037	71.8833	-1.1036	4.77895e-05	FALSE	TRUE	Downregulated
chr1:205473547-205474401	CDK18	0.00617951	0.573193	0.567014	46	0.000271378	22.8917	937.148	254.876	-1.8782	2.51312e-67	TRUE	TRUE	Downregulated
chr6:111135365-111136677	CDK19	0.00475901	0.352213	0.347454	140	0.000271378	17.8775	4549.32	3003.33	-0.599106	1.59324e-11	FALSE	FALSE	Downregulated
chr9:90589703-90589872	CDK20	0	0.240954	0.240954	12	0.00499677	10.2614	572.968	838.835	0.549583	2.17377e-07	FALSE	FALSE	Upregulated
chr12:123754738-123756791	CDK2AP1	0.0103435	0.272961	0.260451	244	0.000271378	16.7946	4217.86	3311.07	-0.349437	0.0485438	TRUE	FALSE	Downregulated
chr12:58145001-58146286	CDK4	0.0419862	0.316694	0.274708	59	0.000791136	13.6273	12056.7	6468.95	-0.898245	2.96797e-16	TRUE	TRUE	Downregulated
chr7:150755669-150758260	CDK5	0.0552328	0.481196	0.426899	136	0.000271378	26.0525	1071.64	2056.38	0.939389	1.49619e-11	FALSE	TRUE	Upregulated
chr17:30813262-30814967	CDK5R1	0.0515234	0.278366	0.226959	237	0.00238362	11.5992	283.111	783.452	1.46456	2.84958e-23	TRUE	FALSE	Upregulated
chr7:92462722-92465623	CDK6	0.0426285	0.39508	0.352832	207	0.000271378	25.217	2256.33	997.526	-1.17735	2.13952e-08	TRUE	TRUE	Downregulated
chr13:26828343-26829149	CDK8	0.00443787	0.46668	0.461124	78	0.000271378	20.8855	1192.95	730.701	-0.708191	5.47186e-09	FALSE	TRUE	Downregulated
chr9:130547307-130548083	CDK9	0.00467008	0.390439	0.400569	100	0.0057678	10.1418	2947.94	2466.45	-0.257578	0.0419235	FALSE	TRUE	Downregulated
chr5:133706711-133707195	CDKL3	0.00122249	0.440859	0.439636	43	0.00272278	11.1036	302.981	220.201	-0.458711	0.0290971	FALSE	TRUE	Downregulated
chrX:18442818-18443209	CDKL5	0.178361	0.492196	0.313835	19	0.0211606	8.14014	196.659	267.934	0.449306	0.0302079	FALSE	FALSE	Upregulated
chr12:12869127-12870959	CDKN1B	0.0325516	0.23466	0.202108	135	0.000271378	17.1826	6238.14	3509.73	-0.829516	3.26956e-09	FALSE	FALSE	Downregulated
chr9:21992822-21996285	CDKN2A	0.0572311	0.418319	0.359626	223	0.000668406	13.7729	62.3038	24.7058	-1.32963	0.00146097	FALSE	FALSE	Downregulated
chr4:184364754-184365271	CDKN2AIP	0.010001	0.309595	0.299594	25	0.00272278	11.1421	338.134	218.54	-0.632199	3.49759e-05	FALSE	FALSE	Downregulated
chr9:21992822-21996285	CDKN2B-AS1	0.0572311	0.418319	0.359626	223	0.000668406	13.7729	500.179	396.095	-0.335674	0.0609188	TRUE	FALSE	NoDiff.
chr1:51433782-51435561	CDKN2C	0.00655358	0.272114	0.259584	162	0.000500314	14.4418	988.032	925.179	-0.0959478	0.586257	FALSE	TRUE	NoDiff.
chr14:54863055-54864619	CDKN3	0.0443152	0.326051	0.281736	108	0.000271378	16.2588	2850.18	1223.05	-1.22082	1.60078e-15	TRUE	TRUE	Downregulated
chr11:125932219-125933155	CDON	0.00591716	0.298694	0.278953	104	0.0214844	8.11133	780.555	1073.69	0.461441	0.0143053	TRUE	FALSE	Upregulated
chr4:85503651-85504573	CDS1	0.00582573	0.236433	0.237259	100	0.00453586	10.4202	2331.66	3255.83	0.481899	3.15176e-07	FALSE	FALSE	Upregulated
chr16:88869906-88871597	CDT1	0.0475405	0.257816	0.210276	142	0.000271378	17.9185	3706.37	1340.34	-1.46768	1.06341e-15	TRUE	FALSE	Downregulated
chr3:133291770-133292052	CDV3	0.0366211	0.257064	0.220443	7	0.00280792	11.0182	25252.7	10244	-1.30161	9.52022e-33	TRUE	FALSE	Downregulated
chr6:4775007-4777390	CDYL	0.00681444	0.29901	0.296878	283	0.000271378	22.6633	1899.32	2417.74	0.347956	4.21402e-05	FALSE	FALSE	Upregulated
chr16:80837239-80838095	CDYL2	0.105056	0.520938	0.417554	110	0.000668406	13.8678	864.498	582.473	-0.569959	0.00351522	TRUE	TRUE	Downregulated
chr19:42210668-42211031	CEACAM5	0.0412744	0.262847	0.221573	16	0.00855827	9.34586	170.089	134.262	-0.343664	0.239401	FALSE	TRUE	NoDiff.
chr19:33792724-33794329	CEBPA	0.00943345	0.239422	0.229515	223	0.000271378	17.9023	1205.5	1502.59	0.317026	0.00116112	FALSE	FALSE	Upregulated
chr19:33792724-33794329	CEBPA-AS1	0.00943345	0.239422	0.229515	223	0.000271378	17.9023	148.163	125.27	-0.243763	0.323642	FALSE	FALSE	NoDiff.
chr20:48807245-48809784	CEBPB	0.00775596	0.270314	0.262558	234	0.000271378	34.0073	2625.46	1612.54	-0.703006	0.00503885	TRUE	TRUE	Downregulated
chr20:48807245-48809784	CEBPB-AS1	0.00775596	0.270314	0.262558	234	0.000271378	34.0073	189.791	126.288	-0.584492	0.0101486	TRUE	TRUE	Downregulated
chr8:48650319-48651620	CEBPD	0.00197042	0.254028	0.239489	165	0.000500314	14.4993	154.34	263.564	0.768139	3.66982e-05	TRUE	FALSE	Upregulated
chr19:33865473-33865836	CEBPG	0.146931	0.53084	0.383909	9	0.0315936	7.66113	2775.69	1952.46	-0.507187	0.0364079	TRUE	FALSE	Downregulated
chr22:17639552-17640200	CECR5	0.00441681	0.263576	0.259159	78	0.00163634	12.6773	2267.58	1357.2	-0.740522	1.28418e-12	FALSE	FALSE	Downregulated
chr11:47573874-47574720	CELF1	0.00587185	0.243989	0.238433	77	0.00220229	12.0131	20397.9	16678.6	-0.290456	1.78279e-05	FALSE	FALSE	Downregulated
chr1:151689032-151689976	CELF3	0.261651	0.573892	0.312241	31	0.00320424	10.8152	90.3361	87.4358	-0.040635	0.906253	FALSE	TRUE	NoDiff.
chr19:3224793-3225575	CELF5	0.0566453	0.58175	0.515269	41	0.0137576	8.69511	271.582	213.453	-0.344523	0.0631553	FALSE	TRUE	NoDiff.
chr15:72612310-72613130	CELF6	0.0100557	0.270216	0.260366	63	0.00191034	12.423	39.6817	50.8506	0.364279	0.487107	TRUE	FALSE	NoDiff.
chr22:46932230-46935715	CELSR1	0.0187424	0.419694	0.414689	342	0.000271378	24.7881	7490.92	2311.73	-1.69621	6.94854e-59	TRUE	TRUE	Downregulated
chr1:109791666-109792781	CELSR2	0.0462514	0.319916	0.27758	121	0.000271378	16.8036	36181.3	15049.8	-1.26547	1.98197e-13	TRUE	TRUE	Downregulated
chr3:48700253-48700862	CELSR3	0.0015674	0.422393	0.420826	41	0.00280792	11.0052	3487.03	4896	0.489685	4.97287e-07	FALSE	FALSE	Upregulated
chr15:81071444-81072402	CEMIP	0.0280072	0.256784	0.228776	79	0.000271378	15.2512	158.553	139.63	-0.184515	0.433256	FALSE	FALSE	NoDiff.
chr16:2582518-2583123	CEMP1	0.0146565	0.261742	0.247085	35	0.000668406	13.7774	486.732	387.094	-0.329504	0.0136905	FALSE	FALSE	Downregulated
chr20:3765056-3767370	CENPB	0.123199	0.490497	0.367298	184	0.000271378	24.853	8602.95	3087.23	-1.47863	1.3366e-21	FALSE	TRUE	Downregulated
chr19:59084522-59084785	CENPBD1P1	0.0025641	0.20936	0.206796	19	0.0247131	7.93045	1201.5	704.545	-0.769729	2.4813e-17	FALSE	FALSE	Downregulated
chr2:25015678-25015912	CENPO	0	0.223121	0.223121	12	0.00320424	10.7745	2862.5	2216.65	-0.36931	0.0351431	FALSE	FALSE	Downregulated
chr17:16255476-16256638	CENPV	0.0404793	0.267353	0.227666	105	0.000500314	14.5025	91.9061	90.5056	-0.0233995	0.952296	TRUE	FALSE	NoDiff.
chr1:3774237-3774919	CEP104	0.0913399	0.385773	0.294433	40	0.0908059	6.27008	2035.79	2659.9	0.386143	0.000135018	FALSE	FALSE	Upregulated
chr14:81407481-81407891	CEP128	0.0210599	0.470007	0.448947	21	0.00111136	12.8844	522.456	238.15	-1.13499	2.84714e-07	FALSE	FALSE	Downregulated
chr17:79195712-79197459	CEP131	0.0941311	0.375737	0.281606	129	0.000271378	16.7374	1558.11	1235.31	-0.335553	0.027375	FALSE	FALSE	Downregulated
chr6:84936664-84937185	CEP162	0.0397956	0.293229	0.253434	17	0.0814988	6.40013	490.218	424.194	-0.208565	0.168736	FALSE	FALSE	NoDiff.
chr11:117198636-117199545	CEP164	0.0118533	0.25178	0.239927	53	0.000271378	16.1358	2356.62	2719.57	0.206923	0.015494	FALSE	FALSE	Upregulated
chr1:243417407-243418571	CEP170	0.00751339	0.348375	0.346862	101	0.000271378	15.943	1644.96	1466.31	-0.1659	0.0696162	FALSE	TRUE	NoDiff.
chr14:105329947-105332876	CEP170B	0.0347169	0.427618	0.392964	246	0.000271378	24.2839	6325.97	3479.65	-0.862553	2.06785e-10	FALSE	TRUE	Downregulated
chr3:196439546-196440087	CEP19	0.0160411	0.29068	0.274638	31	0.00220229	12.172	160.495	285.512	0.830133	4.66945e-06	FALSE	FALSE	Upregulated
chr12:88536063-88536687	CEP290	0.00454993	0.348683	0.344133	38	0.000271378	16.5847	1619.76	2361.79	0.544882	7.58781e-05	FALSE	FALSE	Upregulated
chr1:179923913-179924731	CEP350	0.00321436	0.379679	0.376465	60	0.000271378	19.1752	7064.29	4485.49	-0.655227	2.97744e-09	FALSE	TRUE	Downregulated
chr11:95521720-95522496	CEP57	0.0409108	0.317653	0.276742	23	0.00816356	9.5364	1657.54	1583.91	-0.0650225	0.707228	TRUE	FALSE	NoDiff.
chr12:94853965-94854808	CEP83	0.129866	0.381138	0.251272	35	0.000791136	13.5364	665.646	762.454	0.194583	0.0868338	FALSE	FALSE	NoDiff.
chr12:94853965-94854808	CEP83-AS1	0.129866	0.381138	0.251272	35	0.000791136	13.5364	80.795	67.2441	-0.264572	0.499436	TRUE	FALSE	NoDiff.
chr6:118971968-118973455	CEP85L	0.0242114	0.303276	0.279846	141	0.000271378	15.3556	443.387	375.566	-0.239003	0.118452	FALSE	FALSE	NoDiff.
chr17:62500977-62501767	CEP95	0.00309901	0.221193	0.218094	46	0.000271378	14.8913	5499.77	5502.8	0.00102756	0.994826	FALSE	FALSE	NoDiff.
chr1:111681994-111683268	CEPT1	0.00341089	0.225332	0.221921	96	0.000668406	13.8844	2191.6	1703.77	-0.362824	0.00175829	FALSE	FALSE	Downregulated
chr9:131182210-131183564	CERCAM	0.118422	0.330977	0.212138	125	0.00177479	12.6206	3632.68	4281.15	0.236715	0.0111263	FALSE	TRUE	Upregulated
chr22:47133591-47135258	CERK	0.147415	0.386066	0.250043	153	0.00969814	9.09441	733.223	184.183	-1.99388	1.84655e-30	TRUE	FALSE	Downregulated
chr1:150942936-150947741	CERS2	0.118174	0.506234	0.38806	191	0.000271378	23.6181	28429.3	7711.67	-1.88227	6.08565e-101	TRUE	TRUE	Downregulated
chr19:8272882-8274918	CERS4	0.056742	0.313369	0.255173	160	0.00147648	12.7114	769.527	702.998	-0.129095	0.496352	TRUE	FALSE	NoDiff.
chr2:169312530-169314421	CERS6	0.0575332	0.396215	0.338682	139	0.000271378	20.955	2806.95	2055.77	-0.449046	1.093e-05	FALSE	TRUE	Downregulated
chr16:67034516-67035093	CES4A	0.0026738	0.249078	0.256223	57	0.00218775	12.3094	488.84	453.147	-0.10751	0.63994	TRUE	FALSE	NoDiff.
chr10:106113088-106113467	CFAP58	0.00958173	0.277213	0.267631	13	0.011548	8.86511	10.6685	60.8068	2.52764	5.3407e-07	FALSE	FALSE	Upregulated
chr4:2419374-2420136	CFAP99	0.0382151	0.420777	0.382562	58	0.00111136	12.9408	16.32	191.192	3.55389	4.49788e-36	FALSE	FALSE	Upregulated
chr11:65627311-65629043	CFL1	0.029824	0.260127	0.230303	108	0.000271378	18.7848	51125.2	54755.4	0.0989436	0.549877	FALSE	FALSE	NoDiff.
chr14:35183527-35184113	CFL2	0.00478927	0.206832	0.202043	65	0.00863662	9.28928	1188.85	1468.12	0.303262	0.014856	TRUE	FALSE	Upregulated
chr19:49560699-49561065	CGB7	0.12555	0.518575	0.393025	11	0.00800283	9.58681	18.7949	215.533	3.54254	1.87877e-24	FALSE	FALSE	Upregulated
chr3:88108474-88109462	CGGBP1	0.00284777	0.35589	0.353043	53	0.000271378	19.0103	8975.42	7387.67	-0.280713	0.080972	FALSE	TRUE	NoDiff.
chr3:88199123-88199644	CGGBP1	0.00284921	0.33388	0.331031	30	0.000271378	16.6431	8975.42	7387.67	-0.280713	0.080972	FALSE	FALSE	NoDiff.
chr1:151483765-151485894	CGN	0.0264961	0.353321	0.326825	68	0.000271378	22.3025	4471.48	5716.27	0.354127	0.0076433	TRUE	TRUE	Upregulated
chr15:57668489-57669165	CGNL1	0.00670961	0.399689	0.392792	78	0.00320424	10.8306	298.405	332.68	0.159807	0.540596	TRUE	FALSE	NoDiff.
chr2:27341307-27341976	CGREF1	0.0122096	0.283439	0.27123	70	0.000791136	13.5113	827.255	1042.5	0.334124	0.00720095	TRUE	FALSE	Upregulated
chr14:54975962-54976438	CGRRF1	0.115145	0.394652	0.279508	17	0.00926986	9.16244	798.426	1298.35	0.701381	1.00439e-11	FALSE	FALSE	Upregulated
chrX:153657356-153657735	CH17-340M24.3	0.0499623	0.370358	0.320396	16	0.0389053	7.38425	459.798	409.237	-0.166754	0.369037	FALSE	FALSE	NoDiff.
chr21:37757720-37758249	CHAF1B	0.0120956	0.300325	0.288229	51	0.00220229	11.9366	1286.65	721.575	-0.835374	0.000557346	FALSE	FALSE	Downregulated
chr22:24109125-24110416	CHCHD10	0.188629	0.451234	0.262605	79	0.00833757	9.39289	736.392	282.972	-1.38028	6.18152e-11	TRUE	FALSE	Downregulated
chr3:14166807-14167776	CHCHD4	0.0451646	0.545059	0.499894	39	0.00177479	12.5642	1405.15	1520.01	0.112719	0.335427	TRUE	TRUE	NoDiff.
chr8:57122116-57125041	CHCHD7	0.0149451	0.296137	0.283579	203	0.000271378	21.7335	1210.75	1126.86	-0.103381	0.406388	FALSE	FALSE	NoDiff.
chr5:98262585-98264526	CHD1	0.0284665	0.534328	0.504888	115	0.000271378	30.1689	3940.56	2843.14	-0.470826	2.05687e-07	FALSE	TRUE	Downregulated
chr17:7787618-7790879	CHD3	0.016072	0.51532	0.496036	208	0.000271378	28.8192	23405.2	7963.42	-1.55539	8.25578e-103	TRUE	TRUE	Downregulated
chr12:6714624-6717776	CHD4	0.0446215	0.40024	0.355623	148	0.000271378	15.5572	25791.9	13572.9	-0.926251	2.20057e-25	FALSE	TRUE	Downregulated
chr1:6239547-6240511	CHD5	0.049611	0.367608	0.348439	134	0.0057678	10.1427	245.469	133.07	-0.885575	0.0153099	TRUE	FALSE	Downregulated
chr20:40247506-40247840	CHD6	0.156774	0.368667	0.211894	25	0.0190555	8.27642	13799.8	11318.8	-0.285829	0.00955459	FALSE	TRUE	Downregulated
chr14:21904883-21905783	CHD8	0.0750406	0.461221	0.38618	37	0.000271378	20.4914	12245.2	11028.8	-0.151046	0.062534	FALSE	FALSE	NoDiff.
chr11:125495919-125496752	CHEK1	0	0.364742	0.364742	29	0.000271378	17.384	1676.61	1093.59	-0.617259	0.000158538	FALSE	FALSE	Downregulated
chr22:29138030-29138899	CHEK2	0.0314945	0.45703	0.425536	50	0.000271378	19.6078	2630.77	1192.3	-1.14195	5.28852e-24	TRUE	TRUE	Downregulated
chr19:16653665-16653991	CHERP	0.00347222	0.232542	0.22907	13	0.080891	6.40972	4085.02	4626.97	0.179329	0.0869903	FALSE	FALSE	NoDiff.
chrX:72782524-72783674	CHIC1	0.00107759	0.285317	0.279351	58	0.000500314	14.4593	778.686	486.545	-0.677116	1.20225e-06	FALSE	FALSE	Downregulated
chr11:67888426-67889317	CHKA	0.0100669	0.283876	0.281171	123	0.000271378	14.8254	1448.67	1222.24	-0.24534	0.0362148	FALSE	FALSE	Downregulated
chr22:51021710-51022184	CHKB	0.0466758	0.364005	0.317329	35	0.00401987	10.5421	65.0435	84.3804	0.382262	0.192262	FALSE	FALSE	NoDiff.
chr3:87276579-87277111	CHMP2B	0.00649462	0.284722	0.278227	29	0.00111136	12.733	3501.65	3615.95	0.0461991	0.575873	TRUE	TRUE	NoDiff.
chr2:86789975-86790439	CHMP3	0.00318498	0.209704	0.206519	42	0.0265729	7.84988	2812.19	3274.74	0.219488	0.0159059	FALSE	FALSE	Upregulated
chr20:32399144-32400531	CHMP4B	0.0298479	0.281762	0.253492	69	0.000271378	15.3365	3767.47	3687.83	-0.0311944	0.774073	FALSE	FALSE	NoDiff.
chr2:175869246-175870462	CHN1	0.00322154	0.268792	0.274106	131	0.000271378	15.9455	591.653	558.651	-0.0828616	0.582469	FALSE	FALSE	NoDiff.
chr7:29233972-29235211	CHN2	0.0726914	0.424968	0.356609	117	0.000271378	23.0523	91.0605	355.246	1.96961	1.21378e-14	FALSE	TRUE	Upregulated
chr11:89955610-89956675	CHORDC1	0.00174825	0.270591	0.268843	80	0.00191034	12.4842	1475.53	1044.69	-0.497965	0.00120314	FALSE	FALSE	Downregulated
chr15:41523608-41523956	CHP1	0.00512821	0.329612	0.324484	19	0.0103178	8.9995	4819.14	7405.7	0.619987	7.38316e-11	FALSE	FALSE	Upregulated
chr2:220407699-220408981	CHPF	0.0161727	0.330965	0.314792	134	0.000271378	18.2396	3550.21	2017.25	-0.815669	5.63812e-20	FALSE	TRUE	Downregulated
chr7:150929295-150930958	CHPF2	0.0241211	0.228983	0.204862	113	0.000500314	14.5237	2381.01	3186.46	0.419967	0.000269737	FALSE	FALSE	Upregulated
chr15:78913147-78913481	CHRNA3	0.0262901	0.229754	0.206357	53	0.0403931	7.3381	67.6194	168.084	1.3072	0.000115659	TRUE	FALSE	Upregulated
chr15:78857416-78857682	CHRNA5	0.00684932	0.2585	0.25165	8	0.00220229	12.0661	1399.86	1937.89	0.468642	0.00279168	FALSE	FALSE	Upregulated
chr15:78933188-78933655	CHRNB4	0.0262491	0.316001	0.289752	44	0.0110736	8.92515	46.6543	85.4742	0.882772	0.00190565	FALSE	FALSE	Upregulated
chr11:45686398-45687765	CHST1	0.0469416	0.432091	0.368386	150	0.000791136	13.3676	55.1938	10.4307	-2.40799	2.21657e-07	FALSE	TRUE	Downregulated
chr12:104850140-104851920	CHST11	0.0278085	0.339953	0.312144	150	0.000271378	20.7878	164.065	164.317	0.00490101	0.988653	TRUE	FALSE	NoDiff.
chr15:40762798-40763610	CHST14	0.115009	0.376944	0.277553	78	0.0275345	7.81957	626.157	487.052	-0.362589	0.0311703	TRUE	TRUE	Downregulated
chr10:125851450-125853064	CHST15	0.00363664	0.361019	0.360366	186	0.000271378	18.0078	3298.06	2554.22	-0.368449	0.000542937	FALSE	TRUE	Downregulated
chr10:73723867-73724502	CHST3	0.138446	0.531081	0.372541	76	0.0116892	8.84864	264.73	191.96	-0.462543	0.0216684	FALSE	TRUE	Downregulated
chrX:46433167-46433681	CHST7	0.0015528	0.353216	0.342742	60	0.0138804	8.67962	127.977	102.341	-0.322458	0.10227	FALSE	FALSE	NoDiff.
chr19:34175117-34175481	CHST8	0.0133817	0.280549	0.267167	22	0.00248077	11.5092	96.9181	126.567	0.390128	0.181671	TRUE	FALSE	NoDiff.
chr16:69165238-69166417	CHTF8	0.0214744	0.530444	0.518222	80	0.000271378	18.8726	6197.15	2923.78	-1.08375	3.71726e-29	FALSE	TRUE	Downregulated
chr1:150253589-150255402	CIART	0.0304066	0.344551	0.314145	85	0.000271378	25.3479	1062.3	477.1	-1.15352	6.59971e-11	TRUE	TRUE	Downregulated
chr15:90776276-90777098	CIB1	0.0193629	0.231982	0.212619	45	0.00238362	11.7575	3603.53	4427.03	0.29663	0.0119672	FALSE	FALSE	Upregulated
chr15:78423884-78424278	CIB2	0.0158791	0.260134	0.244255	40	0.00220229	12.1664	6.8133	62.7345	3.21768	3.13259e-13	FALSE	FALSE	Upregulated
chr19:42772067-42772471	CIC	0.0210172	0.249513	0.228495	27	0.0147213	8.61757	3451.83	3310.03	-0.0610297	0.671464	FALSE	FALSE	NoDiff.
chr19:42788180-42789296	CIC	0.178875	0.488348	0.317333	136	0.000668406	13.9782	3451.83	3310.03	-0.0610297	0.671464	FALSE	TRUE	NoDiff.
chr14:77564615-77565078	CIPC	0.00465106	0.238235	0.233584	31	0.000271378	16.3103	3999.27	4357.25	0.123909	0.356093	FALSE	TRUE	NoDiff.
chr16:69165238-69166417	CIRH1A	0.0214744	0.530444	0.518222	80	0.000271378	18.8726	3447.69	2023.98	-0.768862	1.88296e-07	FALSE	TRUE	Downregulated
chr10:60026557-60027512	CISD1	0.00387079	0.319227	0.315356	59	0.000271378	15.4365	1047	1528.26	0.544914	1.63718e-07	FALSE	FALSE	Upregulated
chr4:103789476-103790444	CISD2	0.011212	0.49474	0.483528	64	0.000271378	19.3176	2067.5	482.818	-2.09821	2.08009e-51	FALSE	TRUE	Downregulated
chr17:36886109-36887329	CISD3	0.0134182	0.299338	0.291073	115	0.00320424	10.7761	590.614	496.305	-0.252702	0.128246	FALSE	FALSE	NoDiff.
chr3:50649612-50649929	CISH	0.060626	0.35098	0.290354	24	0.00969814	9.08963	1443.83	874.047	-0.72386	4.99756e-06	FALSE	FALSE	Downregulated
chr6:139693610-139696637	CITED2	0.00802442	0.227774	0.21975	199	0.000271378	21.6768	4508.26	3815.36	-0.240571	0.301838	TRUE	FALSE	NoDiff.
chr9:130952870-130953831	CIZ1	0.192422	0.519227	0.326805	54	0.0457219	7.16378	8763.4	5806.03	-0.59404	4.77745e-12	TRUE	FALSE	Downregulated
chr9:130954966-130955306	CIZ1	0.0133474	0.215668	0.202321	31	0.0193358	8.26818	8763.4	5806.03	-0.59404	4.77745e-12	TRUE	FALSE	Downregulated
chr13:53029083-53029385	CKAP2	0.00184502	0.228932	0.227087	15	0.0082215	9.45299	5550.6	2999.37	-0.887907	4.44013e-19	TRUE	FALSE	Downregulated
chr12:106640914-106642373	CKAP4	0.0480964	0.410244	0.353804	192	0.00111136	12.7711	2462.59	295.529	-3.06073	2.67577e-118	TRUE	TRUE	Downregulated
chr5:80597575-80597870	CKMT2-AS1	0.0904662	0.335966	0.2455	17	0.0835648	6.3705	617.066	527.632	-0.225142	0.104619	FALSE	FALSE	NoDiff.
chr1:154944957-154945648	CKS1B	0.0633273	0.435815	0.372488	12	0.000668406	14.1557	7987.83	2953.12	-1.4356	4.21534e-48	TRUE	FALSE	Downregulated
chr2:122406326-122407032	CLASP1	0.00280899	0.276968	0.274159	52	0.000271378	20.8726	5327.19	5350.86	0.0064391	0.950771	FALSE	FALSE	NoDiff.
chr11:67139480-67142038	CLCF1	0.0628458	0.697173	0.636198	206	0.000271378	33.8864	538.682	160.099	-1.75319	4.84504e-22	TRUE	TRUE	Downregulated
chr3:184079545-184080971	CLCN2	0.00396735	0.438713	0.433267	96	0.000271378	17.7116	552.143	460.769	-0.262446	0.127123	FALSE	TRUE	NoDiff.
chrX:49687382-49688061	CLCN5	0.00529101	0.269947	0.264656	49	0.00899788	9.20595	1208.47	1608.58	0.41316	3.85118e-05	TRUE	FALSE	Upregulated
chr16:1525278-1525533	CLCN7	0.0307175	0.284848	0.253095	27	0.0389241	7.38189	3189.46	2907.39	-0.133309	0.42994	FALSE	FALSE	NoDiff.
chr7:90032717-90033710	CLDN12	0.0537093	0.520285	0.466576	35	0.000271378	20.7274	1756.96	554.853	-1.66209	5.29774e-44	FALSE	TRUE	Downregulated
chr7:73182888-73185329	CLDN3	0.0439419	0.283057	0.239115	190	0.00238362	11.7176	5877.94	3030.57	-0.955584	3.76323e-11	FALSE	FALSE	Downregulated
chr17:7164520-7167253	CLDN7	0.0268187	0.288092	0.259994	184	0.000271378	22.0166	7836.85	9058.76	0.20919	0.0405788	TRUE	TRUE	Upregulated
chr16:3062445-3063126	CLDN9	0.200363	0.576312	0.375949	34	0.0057678	10.1506	1350.1	1497.94	0.14921	0.372387	TRUE	FALSE	NoDiff.
chr4:141348289-141348888	CLGN	0.00619906	0.226713	0.220514	58	0.00220229	12.1813	243.387	775.226	1.6749	2.01307e-11	FALSE	FALSE	Upregulated
chr6:31705864-31706344	CLIC1	0.0449223	0.295385	0.250462	5	0.0568892	6.88812	19820.3	17383.8	-0.189291	0.171255	FALSE	FALSE	NoDiff.
chr1:25070283-25073457	CLIC4	0.0354839	0.318768	0.282583	208	0.000271378	19.4664	8106.83	5297.34	-0.613745	0.00220762	TRUE	FALSE	Downregulated
chr5:157285301-157286083	CLINT1	0.00369458	0.317877	0.314183	40	0.00111136	12.8444	5498.48	6786.35	0.303325	0.000513462	FALSE	FALSE	Upregulated
chr12:122906186-122908336	CLIP1	0.0772141	0.364373	0.287084	181	0.000271378	20.6892	4994.96	4703.27	-0.0866466	0.60209	TRUE	FALSE	NoDiff.
chr7:73702991-73704126	CLIP2	0.0224082	0.410916	0.388508	98	0.000271378	20.2412	125.578	145.857	0.211647	0.380129	TRUE	TRUE	NoDiff.
chr14:95785505-95786460	CLMN	0.0245258	0.37282	0.349828	114	0.000271378	21.6608	2405.78	2550.35	0.0846828	0.592552	TRUE	TRUE	NoDiff.
chr15:68520672-68522516	CLN6	0.0593653	0.351452	0.298552	139	0.000271378	19.4391	2689.56	1594.62	-0.754471	9.05854e-07	FALSE	TRUE	Downregulated
chr8:1711201-1711461	CLN8	0.0284312	0.230895	0.202464	26	0.0969651	6.18719	3174.03	8415.96	1.40664	2.53678e-60	TRUE	FALSE	Upregulated
chr4:56411940-56413699	CLOCK	0.00403137	0.393895	0.392325	174	0.000271378	17.8005	4020.14	1416.87	-1.50442	4.89361e-48	FALSE	TRUE	Downregulated
chr15:65476684-65477891	CLPX	0.00194049	0.289889	0.286382	90	0.000271378	19.839	2659.61	1238.48	-1.10172	2.148e-33	FALSE	FALSE	Downregulated
chr1:9884415-9886302	CLSTN1	0.102382	0.467153	0.364771	59	0.000791136	13.4651	7852.91	6047.97	-0.376901	7.84761e-05	TRUE	FALSE	Downregulated
chr12:7282258-7284060	CLSTN3	0.0367193	0.431784	0.399635	87	0.000271378	19.748	754.911	1050.6	0.475803	0.000531557	TRUE	FALSE	Upregulated
chr5:175842997-175843690	CLTB	0.00447477	0.206587	0.202113	88	0.00470945	10.3225	2004.98	2607.77	0.378712	0.0225822	FALSE	FALSE	Upregulated
chr17:57696544-57698539	CLTC	0.006643	0.316447	0.309804	100	0.000271378	23.7526	84953.1	70590.2	-0.26721	0.00818134	FALSE	TRUE	Downregulated
chr8:27471753-27472374	CLU	0.00256322	0.262357	0.259794	40	0.00163634	12.6593	18399.4	21004.6	0.190972	0.228456	FALSE	FALSE	NoDiff.
chr12:22199261-22200269	CMAS	0.0547546	0.26534	0.211629	46	0.00571959	10.1747	1796.55	2124.6	0.241482	0.00994843	FALSE	FALSE	Upregulated
chr5:10307521-10308419	CMBL	0.0180845	0.629905	0.611821	49	0.000271378	20.0227	4711.95	439.304	-3.42268	5.01927e-99	TRUE	TRUE	Downregulated
chr16:81477830-81478035	CMIP	0.0513487	0.259515	0.208166	21	0.0398591	7.34765	2951.37	3316.9	0.167934	0.183712	TRUE	FALSE	NoDiff.
chr16:66637857-66638835	CMTM3	0.0510219	0.398827	0.344997	83	0.000791136	13.18	78.3178	25.828	-1.60811	5.31897e-08	FALSE	FALSE	Downregulated
chr16:66729950-66731510	CMTM4	0.113351	0.416918	0.342201	168	0.00855827	9.34671	5132.26	3182.6	-0.689374	5.08753e-10	FALSE	FALSE	Downregulated
chr3:32279910-32280966	CMTM8	0.0139575	0.390653	0.376695	101	0.000500314	14.6264	119.486	37.7263	-1.66836	4.84105e-12	FALSE	FALSE	Downregulated
chr6:37401090-37401899	CMTR1	0.0433805	0.402268	0.358887	42	0.00207279	12.3901	5376.25	4917.33	-0.128716	0.0996704	FALSE	FALSE	NoDiff.
chr16:71322819-71324147	CMTR2	0.0331805	0.376538	0.343358	65	0.000791136	13.5818	2623.31	938.767	-1.48201	2.96676e-33	FALSE	TRUE	Downregulated
chr5:78985545-78986065	CMYA5	0.00861887	0.54249	0.533871	51	0.000271378	16.2269	2050.85	804.476	-1.34984	0.00125329	FALSE	FALSE	Downregulated
chr14:54907137-54908075	CNIH1	0.00905441	0.270273	0.261219	75	0.000271378	15.1882	5868.62	4969.53	-0.239814	0.0154639	FALSE	FALSE	Downregulated
chr11:66045645-66046362	CNIH2	0.0879716	0.478179	0.388675	74	0.000791136	13.515	328.86	354.61	0.106868	0.79101	TRUE	TRUE	NoDiff.
chr1:224544524-224544999	CNIH4	0.00373134	0.241914	0.238183	47	0.00218775	12.2587	2882.13	2438.78	-0.24126	0.0103057	FALSE	FALSE	Downregulated
chr6:154830261-154831711	CNKSR3	0.0317906	0.361503	0.329713	112	0.000271378	18.2212	270.002	141.658	-0.933425	3.92123e-08	FALSE	TRUE	Downregulated
chr10:101088828-101089972	CNNM1	0.0566787	0.290736	0.236087	122	0.00111136	12.9115	664.536	412.217	-0.687954	2.37544e-08	FALSE	FALSE	Downregulated
chr2:97481495-97482460	CNNM3	0.00548147	0.224734	0.218679	125	0.000271378	15.2736	4601.31	3972.68	-0.212117	0.0137464	FALSE	FALSE	Downregulated
chr12:70636206-70638416	CNOT2	0.0198581	0.308849	0.288991	142	0.000271378	16.3257	3943.26	2374.31	-0.731565	9.00069e-14	FALSE	TRUE	Downregulated
chr19:54639978-54640558	CNOT3	0.0431628	0.314761	0.271598	24	0.00828857	9.42699	4348.6	3766.7	-0.207316	0.0422044	TRUE	FALSE	Downregulated
chr7:135193667-135195168	CNOT4	0.0071264	0.302192	0.295065	76	0.0057678	10.1221	1657.01	929.941	-0.833235	3.57493e-17	FALSE	TRUE	Downregulated
chr5:179921499-179922200	CNOT6	0.00517633	0.216977	0.2118	95	0.000271378	15.6952	8675.13	6843.27	-0.342238	4.15414e-05	FALSE	FALSE	Downregulated
chr4:78739624-78741720	CNOT6L	0.00446858	0.268402	0.273537	233	0.000271378	22.3761	2447.51	1828.56	-0.420014	0.0010456	TRUE	FALSE	Downregulated
chr8:17104092-17105232	CNOT7	0.00103734	0.366785	0.364985	90	0.000271378	17.2418	7032.83	3947.63	-0.832931	4.26966e-19	TRUE	TRUE	Downregulated
chr5:154237750-154239247	CNOT8	0.00811272	0.292234	0.284121	94	0.000271378	20.0576	4249.76	2881.37	-0.560365	2.54818e-05	FALSE	FALSE	Downregulated
chr17:40117777-40118177	CNP	0.0725091	0.402931	0.330422	11	0.0598966	6.8311	1934.58	1506.15	-0.36195	0.0396892	TRUE	TRUE	Downregulated
chr2:220040704-220043885	CNPPD1	0.0202334	0.29435	0.269461	225	0.000271378	22.5689	4525.47	4235.32	-0.0958539	0.274686	FALSE	FALSE	NoDiff.
chr6:42896951-42898263	CNPY3	0.012785	0.284257	0.270269	66	0.000271378	15.3271	2480.03	1444.86	-0.780049	4.11471e-17	TRUE	FALSE	Downregulated
chr7:145812871-145813933	CNTNAP2	0.200571	0.525349	0.339579	81	0.00833757	9.38726	97.8135	105.621	0.10875	0.722777	FALSE	FALSE	NoDiff.
chr17:7834600-7834957	CNTROB	0.0269715	0.401742	0.37477	12	0.015735	8.54046	3730.73	3824.76	0.0356594	0.798499	TRUE	FALSE	NoDiff.
chr7:51383866-51385068	COBL	0.00805235	0.285134	0.272999	136	0.000271378	16.6962	1436.2	2384.22	0.732169	4.14639e-08	FALSE	TRUE	Upregulated
chr2:165696827-165698572	COBLL1	0.00853597	0.338197	0.33282	135	0.000271378	21.1935	2417.66	1959.81	-0.302616	0.0916842	FALSE	TRUE	NoDiff.
chr14:31343497-31344030	COCH	0.0505366	0.343606	0.293069	67	0.000500314	14.7775	284.439	108.958	-1.38547	5.17163e-09	FALSE	FALSE	Downregulated
chr17:71188188-71188964	COG1	0.01625	0.245443	0.229193	64	0.000668406	13.803	3043.62	4829.42	0.66647	2.65133e-09	FALSE	FALSE	Upregulated
chr16:70557963-70558519	COG4	0.00209644	0.222756	0.220659	22	0.000271378	15.7402	5237.2	5127.31	-0.0308068	0.793647	FALSE	FALSE	NoDiff.
chr6:75915344-75916094	COL12A1	0.0095972	0.33073	0.321133	64	0.000668406	14.0965	15083.6	5850.48	-1.36627	2.69873e-17	FALSE	FALSE	Downregulated
chr21:46823800-46826425	COL18A1	0.154443	0.47258	0.322729	261	0.000271378	20.7743	6906.6	7118.74	0.0434952	0.805941	FALSE	TRUE	NoDiff.
chr21:46875129-46875508	COL18A1	0.150419	0.566667	0.416248	14	0.00635215	9.87017	6906.6	7118.74	0.0434952	0.805941	FALSE	FALSE	NoDiff.
chr6:56112137-56112592	COL21A1	0.0745431	0.349762	0.275218	26	0.0388136	7.39957	108.11	25.9986	-2.04923	4.47324e-10	TRUE	FALSE	Downregulated
chr5:178016994-178017595	COL23A1	0.176413	0.509857	0.333444	83	0.00941507	9.1328	66.9589	36.983	-0.858655	0.00987472	FALSE	TRUE	Downregulated
chr9:116916505-116918206	COL27A1	0.201347	0.535679	0.331513	122	0.00238362	11.5357	411.811	81.4981	-2.33024	2.23891e-24	TRUE	TRUE	Downregulated
chr2:228028490-228029891	COL4A3	0.00857702	0.289266	0.278446	122	0.000791136	13.4901	124.989	195.41	0.641219	0.0339755	TRUE	FALSE	Upregulated
chr5:74806826-74807627	COL4A3BP	0.00479445	0.434525	0.429731	79	0.000271378	21.3643	4242.68	3590.91	-0.240296	0.0359445	FALSE	TRUE	Downregulated
chr2:228028490-228029891	COL4A4	0.00857702	0.289266	0.278446	122	0.000791136	13.4901	42.5648	53.8019	0.337867	0.372339	TRUE	FALSE	NoDiff.
chrX:107682860-107683911	COL4A5	0.0524737	0.540269	0.487796	33	0.000271378	21.5625	3480.71	774.014	-2.16797	6.11982e-57	TRUE	TRUE	Downregulated
chrX:107682860-107683911	COL4A6	0.0524737	0.540269	0.487796	33	0.000271378	21.5625	82.3469	170.408	1.04921	3.07513e-07	TRUE	TRUE	Upregulated
chr9:137533309-137533949	COL5A1	0.00590553	0.390614	0.384709	71	0.000271378	17.9574	4388.34	2438.46	-0.847778	0.000252119	FALSE	FALSE	Downregulated
chr19:10119313-10121323	COL5A3	0.232303	0.548706	0.314649	102	0.0057678	10.1437	340.693	884.521	1.37876	1.42166e-20	TRUE	FALSE	Upregulated
chr21:47401079-47401777	COL6A1	0.00741126	0.746034	0.747012	48	0.000271378	44.9928	491.225	150.153	-1.71391	9.42539e-29	TRUE	TRUE	Downregulated
chr21:47517652-47518232	COL6A2	0.373192	0.671691	0.297745	71	0.0745469	6.53026	375.834	309.114	-0.283436	0.132944	TRUE	TRUE	NoDiff.
chr3:15247891-15248319	COL6A4P1	0.000888099	0.259536	0.258648	57	0.000791136	13.4872	86.6754	130.162	0.591485	0.0463397	TRUE	FALSE	Upregulated
chr15:75628192-75628863	COMMD4	0.00109649	0.277704	0.276608	40	0.00272278	11.3699	3639.39	2263.34	-0.685379	5.01543e-06	FALSE	FALSE	Downregulated
chr8:146077716-146078451	COMMD5	0.0295219	0.252123	0.222601	61	0.00111136	12.8817	1361.12	874.884	-0.638618	7.2129e-06	FALSE	FALSE	Downregulated
chr4:47465209-47465676	COMMD8	0.0110658	0.318117	0.312932	34	0.0130323	8.73964	725.366	639.438	-0.180138	0.210832	FALSE	FALSE	NoDiff.
chr11:14520640-14521453	COPB1	0.00416667	0.214669	0.206902	49	0.00280792	10.9833	8287.93	11008.3	0.409684	4.12139e-05	FALSE	FALSE	Upregulated
chr7:130352780-130354153	COPG2	0.0139845	0.236527	0.222542	124	0.000271378	14.8829	2148.39	1756.71	-0.290731	0.00629601	FALSE	FALSE	Downregulated
chr17:17183849-17184541	COPS3	0.00140449	0.208597	0.210053	65	0.0941177	6.22267	3609.34	3056.02	-0.240485	0.0192269	FALSE	FALSE	Downregulated
chr7:99686699-99687525	COPS6	0.0754614	0.358874	0.283413	23	0.00111136	12.7599	6433.05	4693.1	-0.455143	0.000359367	FALSE	TRUE	Downregulated
chr2:232644942-232645894	COPS7B	0.120347	0.441997	0.31355	76	0.00280792	11.0389	2460	2335.35	-0.075496	0.556928	FALSE	FALSE	NoDiff.
chr2:232650838-232651095	COPS7B	0.0266344	0.230532	0.203898	19	0.0114188	8.89027	2460	2335.35	-0.075496	0.556928	FALSE	FALSE	NoDiff.
chr17:46114725-46115369	COPZ2	0.0260151	0.444595	0.422854	72	0.00163634	12.6659	75.4703	81.237	0.102847	0.781693	TRUE	TRUE	NoDiff.
chr16:30194206-30195924	CORO1A	0.090038	0.46009	0.370052	123	0.000271378	20.5873	1585.7	1188.37	-0.416512	0.0223482	FALSE	TRUE	Downregulated
chr11:67210270-67211042	CORO1B	0.0459003	0.292396	0.249083	48	0.00540774	10.1999	7532.52	12229.5	0.699046	1.81451e-14	FALSE	TRUE	Upregulated
chr12:109124139-109125127	CORO1C	0.0101875	0.332072	0.32678	70	0.00220229	12.1934	4890.68	6614.26	0.435248	1.41142e-05	FALSE	FALSE	Upregulated
chr9:100934808-100935366	CORO2A	0.0479542	0.423864	0.375909	8	0.00926986	9.16646	2231.32	2571.94	0.204683	0.10492	FALSE	FALSE	NoDiff.
chr9:100955145-100955948	CORO2A	0.137043	0.470607	0.333564	47	0.00272278	11.1064	2231.32	2571.94	0.204683	0.10492	FALSE	FALSE	NoDiff.
chr16:84650684-84652731	COTL1	0.0908011	0.34247	0.251962	139	0.000271378	22.077	1378.64	2012.37	0.544895	0.00724508	TRUE	TRUE	Upregulated
chr12:50503989-50504713	COX14	0.346439	0.687789	0.34135	11	0.00220229	12.0645	4013.17	4727.56	0.236304	0.0248666	FALSE	TRUE	Upregulated
chr1:244997046-244997838	COX20	0.00670566	0.259973	0.253267	31	0.00220229	11.9917	1391.78	1006.82	-0.467511	3.45895e-06	TRUE	FALSE	Downregulated
chr16:85832421-85832909	COX4I1	0.00686163	0.256297	0.249436	33	0.000271378	16.2028	20684.5	18012.2	-0.199603	0.029129	FALSE	FALSE	Downregulated
chr2:98261697-98262282	COX5B	0.0943149	0.378136	0.283821	23	0.00220229	11.9965	9229.15	8198.21	-0.170939	0.0851019	FALSE	FALSE	NoDiff.
chr13:46626242-46626671	CPB2-AS1	0.00479846	0.239288	0.23449	29	0.000271378	16.9014	23.0766	98.6765	2.09734	5.69441e-11	FALSE	FALSE	Upregulated
chr4:166300153-166300750	CPE	0.0112305	0.422824	0.410447	63	0.000271378	15.1677	407.403	383.202	-0.0898912	0.705606	TRUE	FALSE	NoDiff.
chr4:15003060-15005532	CPEB2	0.00417165	0.451582	0.446541	277	0.000271378	24.0767	1418.68	559.766	-1.34148	3.54256e-37	FALSE	TRUE	Downregulated
chr10:94003008-94003210	CPEB3	0.0137869	0.309598	0.295811	5	0.0664772	6.68754	266.876	479.132	0.845005	6.3342e-08	FALSE	FALSE	Upregulated
chr10:94050030-94052092	CPEB3	0.00198135	0.240671	0.242092	134	0.000271378	14.8308	266.876	479.132	0.845005	6.3342e-08	FALSE	FALSE	Upregulated
chr5:173314531-173314771	CPEB4	0.0284673	0.263393	0.234926	9	0.00946703	9.11457	1075.26	6642.55	2.62743	1.98623e-107	TRUE	FALSE	Upregulated
chr15:75118686-75119110	CPLX3	0.196331	0.426806	0.252021	41	0.00272278	11.376	67.0159	281.578	2.06886	2.67618e-21	TRUE	FALSE	Upregulated
chr16:57126323-57127449	CPNE2	0.0513854	0.430514	0.350171	122	0.033899	7.56295	411.334	126.061	-1.70809	5.69083e-14	FALSE	TRUE	Downregulated
chr8:87526705-87527451	CPNE3	0.0347052	0.331925	0.29722	58	0.000271378	15.7728	19230.9	21438.2	0.15674	0.0755044	TRUE	FALSE	NoDiff.
chr3:98311771-98312852	CPOX	0.0349968	0.25338	0.218384	92	0.00177479	12.5398	956.804	839.343	-0.189289	0.167997	TRUE	FALSE	NoDiff.
chr8:97657400-97657911	CPQ	0.0753637	0.326564	0.256954	49	0.000668406	13.9155	399.125	289.371	-0.463839	0.00285326	TRUE	FALSE	Downregulated
chr2:211341429-211341796	CPS1	0.0179289	0.259026	0.241097	12	0.0376747	7.42541	311.415	246.892	-0.332682	0.102577	TRUE	FALSE	NoDiff.
chr14:92588336-92589246	CPSF2	0.0552555	0.2906	0.235345	59	0.000271378	17.9693	6473.46	5319.64	-0.283336	0.0057954	FALSE	FALSE	Downregulated
chr2:9562619-9563442	CPSF3	0.00873362	0.213367	0.204634	64	0.00550983	10.1827	4031.04	2394.13	-0.751906	2.03177e-11	FALSE	FALSE	Downregulated
chr7:99036679-99037627	CPSF4	0.0600662	0.307149	0.247083	41	0.00238362	11.5401	2535.57	1799.67	-0.49527	0.000251043	FALSE	FALSE	Downregulated
chr11:61196668-61197370	CPSF7	0.00736217	0.309071	0.301709	65	0.000791136	13.4402	8462.85	6627.98	-0.352727	7.2783e-08	TRUE	FALSE	Downregulated
chr11:68608746-68609449	CPT1A	0.00295276	0.326962	0.324009	87	0.000271378	15.7604	16428.7	12863.5	-0.352912	0.000736463	FALSE	FALSE	Downregulated
chr1:156673680-156676423	CRABP2	0.0945201	0.400836	0.306316	132	0.000271378	20.3496	16829.9	7149.28	-1.23519	6.24453e-17	TRUE	TRUE	Downregulated
chr11:827445-828050	CRACR2B	0.099408	0.595125	0.501894	28	0.00177479	12.565	501.275	558.779	0.159087	0.335775	FALSE	TRUE	NoDiff.
chr12:94071248-94071654	CRADD	0.00186567	0.225453	0.223587	27	0.00635215	9.93997	368.319	649.253	0.820027	1.85263e-10	FALSE	FALSE	Upregulated
chr16:1662715-1664811	CRAMP1L	0.00739013	0.260459	0.248988	188	0.000500314	14.5288	5911.98	5052.94	-0.226371	0.00332835	FALSE	FALSE	Downregulated
chr9:131873016-131873337	CRAT	0	0.229219	0.229219	27	0.00899788	9.21067	382.361	4866.48	3.6717	2.66597e-113	TRUE	FALSE	Upregulated
chr7:65579975-65580660	CRCP	0.0260461	0.310931	0.284885	42	0.00582953	10.0707	3830.45	3055.8	-0.326338	0.000119679	FALSE	FALSE	Downregulated
chr2:208394401-208395896	CREB1	0.00214459	0.4137	0.410081	149	0.000271378	24.7581	3404.1	1824.68	-0.899306	6.21201e-15	FALSE	FALSE	Downregulated
chr11:46299234-46299608	CREB3L1	0.297398	0.556001	0.256759	34	0.0802631	6.42462	40.9605	64.5556	0.665268	0.154297	TRUE	FALSE	NoDiff.
chr16:3929429-3930291	CREBBP	0.00581052	0.307092	0.301281	108	0.000271378	15.1713	10280.3	8910.66	-0.206244	0.0121561	FALSE	FALSE	Downregulated
chr12:12764620-12765597	CREBL2	0.0203567	0.347585	0.327229	52	0.000791136	13.6924	1968.64	809.754	-1.281	2.73566e-26	TRUE	FALSE	Downregulated
chr5:172483343-172484807	CREBRF	0.00363707	0.391557	0.386873	109	0.000271378	15.3478	1153.22	487.469	-1.24144	1.11616e-06	FALSE	TRUE	Downregulated
chr11:85375084-85376044	CREBZF	0.00326035	0.371375	0.368115	87	0.000271378	25.7767	10779.3	6647.75	-0.69718	1.72072e-12	FALSE	FALSE	Downregulated
chr3:9974303-9974749	CRELD1	0.0733348	0.445019	0.371685	36	0.000271378	20.3409	2013.45	2614	0.376735	0.318429	FALSE	FALSE	NoDiff.
chr10:35416023-35416684	CREM	0.00492169	0.42262	0.417698	83	0.000271378	20.9145	782.841	527.553	-0.569347	0.000165568	TRUE	TRUE	Downregulated
chr10:35484533-35485236	CREM	0.151368	0.668182	0.516814	15	0.00470945	10.3265	782.841	527.553	-0.569347	0.000165568	TRUE	TRUE	Downregulated
chr2:36582368-36585098	CRIM1	0.00699349	0.405812	0.399322	264	0.000271378	28.1883	2677.09	600.023	-2.15812	9.92484e-56	FALSE	TRUE	Downregulated
chr14:105938985-105942179	CRIP2	0.0369299	0.373277	0.336347	229	0.000271378	22.1053	8207.35	14482.1	0.819144	1.33007e-14	FALSE	TRUE	Upregulated
chr17:1358271-1359391	CRK	0.00862399	0.358309	0.348703	69	0.000271378	16.646	5432.12	5101.12	-0.090864	0.391091	FALSE	FALSE	NoDiff.
chr22:21271874-21272467	CRKL	0.00505131	0.259354	0.254303	61	0.000791136	13.5267	6350.51	6292.37	-0.0135269	0.910071	FALSE	FALSE	NoDiff.
chr19:18717051-18718027	CRLF1	0.0213671	0.299679	0.273897	118	0.00280792	11.0213	251.49	306.611	0.28305	0.118272	TRUE	FALSE	NoDiff.
chr17:29150988-29151686	CRLF3	0.0367809	0.544205	0.533169	37	0.000271378	15.162	694.622	984.68	0.504302	1.60786e-05	FALSE	TRUE	Upregulated
chr16:54961948-54962588	CRNDE	0.00510985	0.262111	0.220175	49	0.00330477	10.7061	1223.9	735.628	-0.732923	1.2569e-08	FALSE	FALSE	Downregulated
chr16:54963639-54966100	CRNDE	0.00938802	0.430963	0.421575	219	0.000271378	23.6292	1223.9	735.628	-0.732923	1.2569e-08	FALSE	TRUE	Downregulated
chr3:33155244-33155881	CRTAP	0.00812406	0.276513	0.268389	78	0.00718618	9.69462	7298.63	5190.12	-0.491671	4.32244e-05	FALSE	FALSE	Downregulated
chr19:18794339-18795673	CRTC1	0.0679596	0.335204	0.267245	85	0.00238362	11.646	1283.36	823.183	-0.64122	1.19287e-06	FALSE	TRUE	Downregulated
chr15:91073263-91074555	CRTC3	0.103508	0.416157	0.312649	114	0.000271378	15.3648	2183.67	1380.69	-0.661982	2.50889e-11	FALSE	FALSE	Downregulated
chr12:107487662-107488213	CRY1	0.0167572	0.411257	0.3945	34	0.00725794	9.66192	1162.57	1726.6	0.570405	1.25608e-05	FALSE	FALSE	Upregulated
chr22:25844231-25844874	CRYBB2P1	0.00734636	0.251838	0.244491	18	0.00238362	11.608	633.696	794.461	0.32591	0.0192265	FALSE	FALSE	Upregulated
chr3:97540262-97541817	CRYBG3	0.046641	0.364844	0.318203	129	0.000271378	20.1041	518.159	285.942	-0.856558	5.29183e-07	FALSE	FALSE	Downregulated
chr13:21099176-21100426	CRYL1	0.0703763	0.278054	0.207677	121	0.000271378	15.5781	1395.3	1888.38	0.436404	4.85291e-06	FALSE	FALSE	Upregulated
chr1:75198093-75198921	CRYZ	0.036715	0.295322	0.257872	27	0.0121283	8.81311	1620.16	1227.37	-0.400496	0.000574506	FALSE	FALSE	Downregulated
chr21:35014624-35015683	CRYZL1	0.00246026	0.250239	0.240109	131	0.010418	8.97779	930.655	1205.12	0.373914	0.0103196	FALSE	FALSE	Upregulated
chr12:53573543-53575697	CSAD	0.0970738	0.419737	0.322664	144	0.000271378	18.1147	3712.95	1787.69	-1.05401	4.71302e-08	TRUE	TRUE	Downregulated
chr20:47662406-47662671	CSE1L	0.0447061	0.276349	0.231643	12	0.0361104	7.48415	14460.4	9515.36	-0.603863	2.46309e-05	FALSE	FALSE	Downregulated
chr15:75074567-75076136	CSK	0.034623	0.512345	0.476333	90	0.000271378	17.0421	4295.7	2432.56	-0.820733	1.21987e-08	FALSE	TRUE	Downregulated
chr8:114449718-114450016	CSMD3	0.00856227	0.252078	0.243515	10	0.0239102	7.98341	139.586	691.205	2.30309	5.92273e-32	FALSE	FALSE	Upregulated
chr5:148930250-148930658	CSNK1A1	0.00239302	0.204228	0.201835	28	0.00238362	11.6843	12188.7	13992.6	0.199238	0.0429281	FALSE	FALSE	Upregulated
chr22:38711359-38714481	CSNK1E	0.0506146	0.474728	0.433474	190	0.000271378	18.616	170.373	115.574	-0.56499	0.0394302	FALSE	TRUE	Downregulated
chr16:58231052-58232575	CSNK2A2	0.0358585	0.309623	0.300716	153	0.00320424	10.8495	916.109	537.846	-0.767508	6.43109e-08	FALSE	FALSE	Downregulated
chr3:39190942-39195406	CSRNP1	0.0908491	0.486354	0.396642	187	0.000271378	20.7844	1089.65	832.077	-0.389529	0.0388232	TRUE	TRUE	Downregulated
chr12:51476450-51477503	CSRNP2	0.0240724	0.404443	0.380371	84	0.000271378	16.679	2751.14	1343.7	-1.03414	5.83476e-17	FALSE	TRUE	Downregulated
chr1:201475451-201475811	CSRP1	0.226582	0.50384	0.277258	4	0.0856566	6.33746	7931.95	10247.1	0.369369	0.00615429	TRUE	FALSE	Upregulated
chr1:201476211-201476463	CSRP1	0.14051	0.361198	0.220687	30	0.0388136	7.39286	7931.95	10247.1	0.369369	0.00615429	TRUE	FALSE	Upregulated
chr12:77272724-77273575	CSRP2	0.045383	0.376146	0.330763	68	0.00111136	12.7518	144.838	521.092	1.84058	1.05381e-29	TRUE	FALSE	Upregulated
chr20:23618031-23618751	CST3	0.00529437	0.481882	0.486264	81	0.000271378	19.943	6666.86	4294.31	-0.63474	1.78812e-11	FALSE	TRUE	Downregulated
chr21:45195743-45196247	CSTB	0.00107296	0.222417	0.221344	55	0.0268594	7.84233	6238.94	7975.8	0.354146	0.00232346	FALSE	FALSE	Upregulated
chr15:71406697-71408782	CT62	0.0285187	0.255617	0.227099	158	0.000271378	22.3876	188.067	101.923	-0.879228	3.04289e-05	FALSE	TRUE	Downregulated
chr4:1240264-1241946	CTBP1-AS2	0.104148	0.353156	0.249008	87	0.00712248	9.7065	1325.93	997.724	-0.411519	0.00231701	FALSE	FALSE	Downregulated
chr10:126847206-126850197	CTBP2	0.00323791	0.409726	0.402191	358	0.000271378	26.2019	5389.43	2998.13	-0.845762	1.71524e-22	FALSE	TRUE	Downregulated
chr17:7154001-7154915	CTDNEP1	0.0256105	0.342289	0.308852	56	0.0214407	8.12293	4260.29	3620.6	-0.234885	0.0143402	TRUE	FALSE	Downregulated
chr17:7155617-7156286	CTDNEP1	0.0131465	0.286195	0.273049	45	0.00479912	10.3166	4260.29	3620.6	-0.234885	0.0143402	TRUE	FALSE	Downregulated
chr2:219260749-219266059	CTDSP1	0.0161328	0.362814	0.344624	370	0.000271378	31.3307	3578.95	1511.95	-1.24312	3.15163e-50	TRUE	TRUE	Downregulated
chr12:58238491-58240663	CTDSP2	0.00379517	0.38004	0.376245	178	0.000271378	20.5516	13725.3	11478.9	-0.257771	0.0295995	TRUE	TRUE	Downregulated
chr3:37903701-37903887	CTDSPL	0.00657895	0.470871	0.464292	20	0.000668406	14.1782	679.172	94.6845	-2.83683	5.59067e-43	TRUE	FALSE	Downregulated
chr15:44719367-44720388	CTDSPL2	0.00261925	0.314793	0.314831	57	0.000791136	13.695	1597.7	827.259	-0.949608	1.40512e-25	FALSE	FALSE	Downregulated
chr16:30907529-30908420	CTF1	0.0880265	0.451973	0.363947	43	0.00248077	11.4727	398.812	155.093	-1.35903	1.00021e-11	FALSE	TRUE	Downregulated
chr6:132271435-132272454	CTGF	0.128983	0.421669	0.290393	109	0.0031528	10.8607	2647.44	3284.31	0.31101	0.731083	FALSE	FALSE	NoDiff.
chr8:104383647-104384056	CTHRC1	0.0303939	0.300456	0.270062	46	0.000668406	14.1167	51.2624	74.5764	0.5423	0.0545226	FALSE	FALSE	NoDiff.
chr18:46065217-46067943	CTIF	0.00739474	0.378596	0.34691	250	0.000271378	16.8069	771.193	304.69	-1.33783	4.93927e-22	TRUE	TRUE	Downregulated
chr5:138088071-138090063	CTNNA1	0.0210282	0.272277	0.238395	169	0.000271378	16.5281	23446.8	18458.7	-0.345123	8.48295e-05	FALSE	TRUE	Downregulated
chr3:41240354-41241661	CTNNB1	0.00536075	0.257307	0.25665	150	0.000791136	13.5385	12662.2	15241.9	0.267471	0.00338814	TRUE	FALSE	Upregulated
chr1:9969375-9971115	CTNNBIP1	0.00844368	0.351164	0.329286	153	0.000271378	16.554	977.041	621.222	-0.653316	6.73566e-07	FALSE	FALSE	Downregulated
chr5:11903423-11905770	CTNND2	0.0982511	0.401851	0.3036	190	0.000271378	20.2738	3413.54	4300.87	0.333701	0.0113561	TRUE	TRUE	Upregulated
chrX:16730051-16731266	CTPS2	0.0197203	0.384395	0.364675	93	0.00191034	12.4121	3418.12	1283.86	-1.41198	2.08009e-51	FALSE	TRUE	Downregulated
chr20:44519281-44519582	CTSA	0.109017	0.336321	0.225555	32	0.0688751	6.64327	5558.12	6701.92	0.269971	0.0049722	FALSE	FALSE	Upregulated
chr8:11724743-11726586	CTSB	0.028071	0.379988	0.363348	150	0.000271378	17.6731	5483.48	3884.92	-0.497134	1.49626e-09	FALSE	FALSE	Downregulated
chr15:79237180-79237990	CTSH	0.0289952	0.305385	0.276389	64	0.00470945	10.3415	1814.59	1693.44	-0.100125	0.62941	TRUE	TRUE	NoDiff.
chr9:99801319-99801863	CTSV	0.00142045	0.215761	0.21434	45	0.0241271	7.97231	720.555	1164.93	0.692487	1.32648e-05	FALSE	FALSE	Upregulated
chr11:70243671-70244414	CTTN	0.0156868	0.375082	0.359395	35	0.000271378	15.7021	22336.4	26735.7	0.259313	0.00168348	FALSE	TRUE	Upregulated
chr16:88773081-88773601	CTU2	0.0750458	0.32896	0.253914	25	0.0376747	7.42992	1375.02	1077.6	-0.352488	0.0331278	FALSE	FALSE	Downregulated
chr19:7990153-7991556	CTXN1	0.082126	0.363668	0.258643	173	0.00238362	11.634	386.274	243.976	-0.664954	0.024995	TRUE	TRUE	Downregulated
chr17:56031844-56033464	CUEDC1	0.0682915	0.388109	0.321554	166	0.000271378	21.8528	1470.63	535.335	-1.45899	4.03731e-38	FALSE	TRUE	Downregulated
chr10:104191744-104192642	CUEDC2	0.0148958	0.23293	0.218524	54	0.00899788	9.20714	1593.09	1118.45	-0.510519	0.000241802	TRUE	TRUE	Downregulated
chr7:148395431-148396429	CUL1	0.00496444	0.456431	0.472913	135	0.000271378	22.68	4063.89	1393.59	-1.54428	5.69694e-49	TRUE	TRUE	Downregulated
chr10:35378436-35379406	CUL2	0.0159989	0.39431	0.377437	64	0.000271378	16.9585	3155.6	2397.61	-0.39657	8.43241e-05	FALSE	TRUE	Downregulated
chr2:225448674-225450294	CUL3	0.00915069	0.331059	0.323761	166	0.000271378	17.4517	4134.12	1267.72	-1.70593	8.14358e-61	TRUE	TRUE	Downregulated
chrX:119694152-119695552	CUL4B	0.00619078	0.485215	0.497116	72	0.000271378	24.6387	5059.86	2034.4	-1.31435	3.85294e-20	FALSE	TRUE	Downregulated
chr6:43149777-43150378	CUL9	0.0139088	0.451468	0.43756	43	0.00177479	12.5189	3392.07	1132.85	-1.58174	3.55395e-47	TRUE	TRUE	Downregulated
chr7:101457036-101457677	CUX1	0.0150866	0.341122	0.326035	47	0.000271378	15.4576	17904.8	10100.1	-0.825915	1.55601e-22	FALSE	FALSE	Downregulated
chr7:101458307-101461130	CUX1	0.0089038	0.267761	0.26059	369	0.000271378	28.3993	17904.8	10100.1	-0.825915	1.55601e-22	FALSE	FALSE	Downregulated
chr17:36981096-36981513	CWC25	0.00657895	0.283267	0.276688	23	0.00238362	11.6947	883.877	818.854	-0.109012	0.323069	FALSE	FALSE	NoDiff.
chr5:64064029-64064466	CWC27	0.00506757	0.487301	0.482233	19	0.085554	6.33902	1845.23	1473.76	-0.324462	0.00138592	FALSE	FALSE	Downregulated
chr10:102026688-102027412	CWF19L1	0.0127244	0.222216	0.209492	34	0.000500314	14.3808	1741.19	1484.69	-0.230238	0.0228946	TRUE	FALSE	Downregulated
chr21:18884869-18885854	CXADR	0.00752734	0.414777	0.407249	112	0.000271378	18.5086	106.479	34.8063	-1.62322	7.68027e-06	FALSE	FALSE	Downregulated
chr10:44879950-44880708	CXCL12	0.0471219	0.261045	0.221511	93	0.00238362	11.8092	3086.9	217.897	-3.82354	5.69143e-72	TRUE	FALSE	Downregulated
chr17:4641763-4643295	CXCL16	0.0339234	0.342707	0.308783	134	0.000271378	14.9796	921.834	565.211	-0.70723	8.58976e-08	FALSE	FALSE	Downregulated
chr2:136873746-136876131	CXCR4	0.0129076	0.457561	0.444653	166	0.000271378	30.293	434.24	55.0134	-2.97605	2.88361e-35	TRUE	TRUE	Downregulated
chr4:105415701-105416530	CXXC4	0.0270369	0.610967	0.58393	40	0.000271378	19.4251	117.083	16.1102	-2.84598	4.75189e-10	TRUE	TRUE	Downregulated
chr5:139027328-139031987	CXXC5	0.0129485	0.524728	0.511994	321	0.000271378	30.9977	4650.36	807.672	-2.5257	6.64708e-63	TRUE	TRUE	Downregulated
chrX:40505477-40506639	CXorf38	0.0175659	0.250624	0.233058	54	0.000959715	13.0883	1452.85	1488.4	0.0349301	0.771149	FALSE	FALSE	NoDiff.
chrX:148620755-148622037	CXorf40A	0.0103546	0.349728	0.354837	54	0.000271378	15.7154	1971.36	2392.48	0.279645	0.0917764	FALSE	TRUE	NoDiff.
chrX:149108238-149109155	CXorf40B	0.0718437	0.355027	0.283183	33	0.00129309	12.7133	2956.88	3346.67	0.179002	0.301011	TRUE	TRUE	NoDiff.
chr17:61522793-61524891	CYB561	0.0525928	0.339582	0.286989	176	0.000271378	20.0433	18553.1	23030.1	0.311845	0.0339504	FALSE	TRUE	Upregulated
chr1:110036589-110037126	CYB561D1	0.00398268	0.335855	0.331873	37	0.000271378	17.0246	3516.42	2958.55	-0.24935	0.0173552	FALSE	TRUE	Downregulated
chr17:7759209-7760137	CYB5D1	0.152101	0.522024	0.369923	35	0.000668406	13.8702	2036.97	3706.24	0.864107	4.65406e-12	FALSE	FALSE	Upregulated
chr2:172378823-172380516	CYBRD1	0.0622292	0.309672	0.247443	128	0.000271378	16.4049	13.4157	103.626	2.94712	1.03504e-20	FALSE	FALSE	Upregulated
chr15:22892184-22893348	CYFIP1	0.00616333	0.532963	0.526173	129	0.000271378	20.9987	5308.43	1713.48	-1.63128	6.96772e-57	FALSE	FALSE	Downregulated
chr8:145689344-145693320	CYHR1	0.0960221	0.37119	0.277837	286	0.000271378	18.783	2078.93	1478.56	-0.491702	9.17527e-07	FALSE	TRUE	Downregulated
chr16:50775199-50775358	CYLD	0.0119048	0.301221	0.289316	6	0.05533	6.92745	689.117	1585.03	1.20322	2.52046e-24	FALSE	FALSE	Upregulated
chr15:75017904-75018828	CYP1A1	0.00520833	0.330646	0.325333	67	0.00220229	12.0011	72.3708	159.506	1.13814	0.211569	TRUE	TRUE	NoDiff.
chr2:38300645-38303138	CYP1B1	0.119732	0.343925	0.224193	205	0.000668406	14.2756	1480.85	3513.08	1.2461	0.000422708	TRUE	FALSE	Upregulated
chr20:52790589-52790950	CYP24A1	0.0268541	0.524508	0.497654	40	0.000271378	15.8792	71.7312	38.6038	-0.895769	0.0579229	FALSE	TRUE	NoDiff.
chr2:72375309-72376992	CYP26B1	0.0334174	0.523794	0.490377	147	0.000271378	27.6565	326.693	367.659	0.170111	0.601065	FALSE	TRUE	NoDiff.
chr12:58158967-58160911	CYP27B1	0.0131039	0.264151	0.251047	126	0.000271378	24.5084	679.961	735.955	0.114595	0.388333	TRUE	FALSE	NoDiff.
chr1:60392134-60392392	CYP2J2	0.0133765	0.286914	0.273537	14	0.0579398	6.86912	528.952	1159.38	1.1338	2.73899e-10	FALSE	FALSE	Upregulated
chr14:100149530-100150168	CYP46A1	0.00575962	0.350839	0.34508	42	0.000271378	18.5139	92.5135	327.457	1.81573	6.01025e-16	FALSE	FALSE	Upregulated
chr19:15619169-15619491	CYP4F22	0.0440755	0.266037	0.221961	38	0.00238362	11.7656	16.2329	63.7777	1.99313	5.42986e-08	FALSE	FALSE	Upregulated
chr1:86046380-86047239	CYR61	0.00934343	0.275735	0.268448	96	0.00669853	9.79511	3140.89	3866.12	0.299714	0.530896	FALSE	FALSE	NoDiff.
chr9:140116093-140117280	CYSRT1	0.0614897	0.364364	0.308058	142	0.000500314	14.7498	455.156	1550.77	1.76715	2.47924e-31	TRUE	TRUE	Upregulated
chr17:76778172-76778764	CYTH1	0.00586745	0.194999	0.205475	84	0.0202682	8.17918	2495.7	4367.99	0.806946	7.66706e-14	TRUE	TRUE	Upregulated
chr6:39759797-39760425	DAAM2	0.0288748	0.370113	0.341238	56	0.000271378	15.8621	33.1387	79.1174	1.25344	1.02887e-05	FALSE	FALSE	Upregulated
chr5:39424508-39425260	DAB2	0.00948582	0.392313	0.382827	43	0.000271378	21.3406	121.447	65.6591	-0.883809	0.066097	TRUE	FALSE	NoDiff.
chr19:47164820-47165168	DACT3	0.0319265	0.276221	0.244294	13	0.0309223	7.69695	6.59839	106.364	3.98609	2.74497e-05	FALSE	FALSE	Upregulated
chr3:49506717-49507234	DAG1	0.0410831	0.27381	0.232726	15	0.0899562	6.27897	9103.07	10754.6	0.240348	0.00405918	FALSE	FALSE	Upregulated
chr11:61447285-61448154	DAGLA	0.0672923	0.281163	0.213871	93	0.00571959	10.1718	722.817	364.218	-0.990843	7.2946e-14	TRUE	TRUE	Downregulated
chr3:49057646-49058554	DALRD3	0.0200955	0.34369	0.323594	48	0.00207279	12.3804	765.91	1165.98	0.60647	1.24359e-07	FALSE	FALSE	Upregulated
chr5:10760269-10762090	DAP	0.0615191	0.40275	0.34146	165	0.000271378	23.4569	6782.71	3487.34	-0.959789	4.15839e-13	FALSE	TRUE	Downregulated
chr1:155657682-155658816	DAP3	0.00209095	0.471257	0.470623	100	0.000271378	25.3431	8781.07	5676.88	-0.629243	1.26414e-15	FALSE	TRUE	Downregulated
chr15:64338282-64338855	DAPK2	0.00821539	0.373818	0.349311	85	0.0057678	10.1039	70.1931	57.6265	-0.28656	0.421046	FALSE	FALSE	NoDiff.
chr2:136742836-136743594	DARS	0.00885936	0.229078	0.220218	61	0.0155452	8.55551	4671.37	2891.34	-0.691924	1.21157e-19	FALSE	TRUE	Downregulated
chr2:136742836-136743594	DARS-AS1	0.00885936	0.229078	0.220218	61	0.0155452	8.55551	32.1388	53.1917	0.735809	0.136571	FALSE	TRUE	NoDiff.
chr12:51632035-51632256	DAZAP2	0.1045	0.568987	0.464487	7	0.00191034	12.415	17320.2	23924.7	0.466099	6.86398e-07	FALSE	FALSE	Upregulated
chr2:120124775-120125428	DBI	0.0079875	0.461027	0.453039	44	0.000271378	14.8727	13796.4	13845.5	0.00506413	0.97803	FALSE	FALSE	NoDiff.
chr17:654374-654952	DBIL5P	0.0623188	0.291078	0.228759	20	0.0273396	7.82461	102.178	76.0405	-0.424531	0.264895	FALSE	FALSE	NoDiff.
chr5:176899611-176900939	DBN1	0.0333076	0.517164	0.482674	153	0.000271378	21.1046	2673.44	578.942	-2.20799	1.15981e-34	FALSE	TRUE	Downregulated
chr16:90084561-90086293	DBNDD1	0.0157043	0.316548	0.301839	153	0.000500314	14.4234	5294.47	8960.51	0.758893	2.84829e-10	TRUE	TRUE	Upregulated
chr20:44034322-44035478	DBNDD2	0.0164623	0.366565	0.350103	122	0.000271378	18.5078	184.957	128.957	-0.521395	0.00477435	FALSE	FALSE	Downregulated
chr19:49138730-49141325	DBP	0.00765013	0.366195	0.359559	177	0.000271378	26.3162	1005.07	407.191	-1.30231	1.63925e-16	TRUE	TRUE	Downregulated
chr1:100715118-100715793	DBT	0.00482738	0.240002	0.235175	28	0.00384605	10.5986	1500.74	1443.41	-0.055451	0.768423	FALSE	FALSE	NoDiff.
chr9:37800695-37801907	DCAF10	0.00273614	0.229975	0.226507	112	0.00248077	11.4649	2259.58	2450.54	0.117741	0.244054	FALSE	FALSE	NoDiff.
chr14:24582753-24583548	DCAF11	0.0390841	0.359948	0.320864	45	0.00238362	11.7067	9079.1	9099.89	0.00346469	0.980839	FALSE	TRUE	NoDiff.
chr9:34125603-34127068	DCAF12	0.0124812	0.289084	0.276603	88	0.000271378	16.5202	3584.71	1823.15	-0.975013	2.59825e-23	FALSE	TRUE	Downregulated
chrX:125299981-125300612	DCAF12L2	0.094125	0.576326	0.482201	56	0.000271378	14.9291	42.2885	62.7993	0.56194	0.268035	TRUE	TRUE	NoDiff.
chr8:104426604-104427229	DCAF13	0.00413219	0.264534	0.260401	48	0.000271378	16.9485	7059.48	6765.16	-0.0615136	0.512741	TRUE	FALSE	NoDiff.
chr19:14063448-14064374	DCAF15	0.0500163	0.538586	0.484523	32	0.000668406	14.2559	1799.85	1190.55	-0.596714	3.63772e-05	FALSE	TRUE	Downregulated
chr14:73391034-73391549	DCAF4	0.0265959	0.303604	0.277008	6	0.0177862	8.37956	2908.04	1663.28	-0.805564	1.77843e-12	TRUE	FALSE	Downregulated
chr14:69617887-69620517	DCAF5	0.0151652	0.476044	0.460879	200	0.000271378	29.3343	6111.82	1806.47	-1.75837	1.27836e-68	FALSE	TRUE	Downregulated
chr1:167904226-167905277	DCAF6	0.0221031	0.272041	0.249938	45	0.00946703	9.12106	2894.02	1979.27	-0.548259	6.80989e-10	FALSE	FALSE	Downregulated
chr1:160231585-160232146	DCAF8	0.00522648	0.248777	0.24355	33	0.000791136	13.2026	6333.95	6143.12	-0.043947	0.721157	FALSE	FALSE	NoDiff.
chr6:117803888-117804979	DCBLD1	0.00295321	0.303818	0.300865	90	0.000271378	15.2694	499.151	538.077	0.107587	0.394608	TRUE	FALSE	NoDiff.
chr3:98618974-98620472	DCBLD2	0.0802362	0.406419	0.326183	80	0.00111136	12.7921	3399.91	2697.28	-0.334248	0.000900553	TRUE	TRUE	Downregulated
chr13:36704879-36705853	DCLK1	0.0305258	0.424596	0.39407	92	0.000271378	19.5479	454.053	113.936	-1.99158	2.14944e-20	FALSE	TRUE	Downregulated
chr4:150999345-151000757	DCLK2	0.0283546	0.406685	0.366857	156	0.000271378	16.6938	79.0312	67.3184	-0.232276	0.431733	TRUE	TRUE	NoDiff.
chr10:14996380-14996663	DCLRE1C	0.00220264	0.231806	0.229604	11	0.00702778	9.74844	1577.2	1109.17	-0.507817	3.80453e-05	FALSE	FALSE	Downregulated
chr12:2113054-2113623	DCP1B	0.00586206	0.401514	0.390982	37	0.000271378	17.0281	546.228	281.794	-0.953779	8.2388e-18	TRUE	FALSE	Downregulated
chr4:183838152-183839070	DCTD	0	0.361098	0.38632	120	0.0376741	7.43131	972.385	268.678	-1.85539	7.09356e-71	FALSE	FALSE	Downregulated
chr16:23651693-23652425	DCTN5	0.126157	0.356448	0.23029	25	0.00470945	10.3378	11142.6	13638.5	0.291563	0.000312591	FALSE	FALSE	Upregulated
chr3:182697159-182698730	DCUN1D1	0.014963	0.461645	0.44915	144	0.000271378	19.6228	3497.9	906.459	-1.94804	4.20659e-49	FALSE	TRUE	Downregulated
chr13:114145361-114146232	DCUN1D2	0.0190482	0.52335	0.508082	56	0.000959715	13.055	850.468	869.716	0.0331969	0.822907	FALSE	TRUE	NoDiff.
chr16:20910620-20912369	DCUN1D3	0.0500911	0.486124	0.436032	86	0.000271378	19.2365	578.379	272.425	-1.08765	1.11819e-11	TRUE	TRUE	Downregulated
chr4:52709532-52710870	DCUN1D4	0.00660066	0.454864	0.454813	99	0.000271378	20.7882	3127.2	2245.14	-0.478134	2.0116e-07	TRUE	TRUE	Downregulated
chr11:102962176-102962864	DCUN1D5	0.00232558	0.288018	0.29368	52	0.00800283	9.56236	1387.23	1442.2	0.0553998	0.697135	FALSE	FALSE	NoDiff.
chr1:85930600-85931147	DDAH1	0.0202381	0.248886	0.229343	80	0.0128426	8.75957	2017.71	1949.5	-0.0499307	0.731543	FALSE	FALSE	NoDiff.
chr6:31696889-31697465	DDAH2	0.011422	0.280699	0.269277	22	0.000668406	13.9751	7406.85	6502.23	-0.188025	0.166112	FALSE	FALSE	NoDiff.
chr11:47235709-47236276	DDB2	0.016735	0.313051	0.296316	26	0.0334879	7.57409	3899.06	3895.25	-0.00112152	0.993449	FALSE	FALSE	NoDiff.
chr8:38088541-38089930	DDHD2	0.0129619	0.290589	0.276345	133	0.00220229	12.1208	1838.23	1543.13	-0.252456	0.014267	FALSE	FALSE	Downregulated
chr1:15943235-15944063	DDI2	0.029828	0.483846	0.449423	51	0.00833757	9.40869	674.532	554.495	-0.283555	0.0113532	FALSE	TRUE	Downregulated
chr11:82611298-82612636	DDIAS	0.00466781	0.31631	0.311642	65	0.000271378	21.6918	1823.84	674.972	-1.43447	5.64988e-20	TRUE	FALSE	Downregulated
chr12:57913460-57914819	DDIT3	0.0162271	0.219058	0.204048	82	0.000500314	14.5532	1798.31	1177.92	-0.61029	0.372067	TRUE	FALSE	NoDiff.
chr10:74032583-74034490	DDIT4	0.0116667	0.331494	0.319828	131	0.000271378	18.9459	3742.51	1018.4	-1.87745	1.04966e-08	TRUE	FALSE	Downregulated
chr6:30851486-30853096	DDR1	0.0177626	0.60422	0.58669	117	0.000271378	20.5529	16956.7	9239	-0.876057	3.30893e-27	FALSE	TRUE	Downregulated
chr2:15731864-15732901	DDX1	0.0123624	0.242747	0.231424	74	0.000271378	15.7685	8330.51	5922.88	-0.492229	9.86496e-07	FALSE	FALSE	Downregulated
chr22:38900723-38902323	DDX17	0.00681569	0.316838	0.304009	130	0.00111136	12.8222	31321.6	21235.2	-0.560648	3.47968e-07	FALSE	FALSE	Downregulated
chr16:70322036-70323253	DDX19B	0.00369584	0.257205	0.253509	67	0.000271378	17.7346	2198.63	1889.81	-0.218715	0.0209954	TRUE	FALSE	Downregulated
chr1:112297672-112299263	DDX20	0.0108847	0.299577	0.288693	114	0.000271378	17.8785	1491.2	716.633	-1.05677	1.4895e-19	TRUE	TRUE	Downregulated
chrX:134654536-134656532	DDX26B	0.0649124	0.589104	0.534102	134	0.000271378	17.9293	1501.64	344.049	-2.12682	1.10711e-91	TRUE	TRUE	Downregulated
chr9:135545574-135546791	DDX31	0.0186199	0.300621	0.282001	101	0.000791136	13.4738	1334.97	1207.97	-0.144749	0.177433	FALSE	FALSE	NoDiff.
chr6:31507701-31510407	DDX39B	0.0234841	0.276765	0.253281	91	0.000271378	20.6672	203.241	213.511	0.0743238	0.749408	TRUE	FALSE	NoDiff.
chrX:41191928-41193084	DDX3X	0.0108205	0.4	0.386977	90	0.000668406	13.7248	24497.5	14071.2	-0.799941	8.19029e-19	FALSE	TRUE	Downregulated
chr5:176943650-176943935	DDX41	0.003153	0.221689	0.218536	36	0.000271378	16.8462	6656.16	5975.39	-0.155847	0.0623412	TRUE	FALSE	NoDiff.
chr17:61851618-61852318	DDX42	0.00218103	0.225481	0.2233	50	0.000271378	19.9272	17312.8	11475.8	-0.59323	1.17521e-13	FALSE	FALSE	Downregulated
chr1:200638644-200639857	DDX59	0.00599959	0.265102	0.254053	82	0.000271378	14.9699	1486.08	819.158	-0.858783	1.44014e-09	TRUE	TRUE	Downregulated
chr11:118661138-118662593	DDX6	0.00505051	0.320399	0.315786	130	0.000271378	18.5376	31816.7	11192.9	-1.50714	1.08965e-76	TRUE	TRUE	Downregulated
chr4:169239492-169240081	DDX60	0.0300834	0.365902	0.335819	39	0.000271378	16.878	45.8969	126.501	1.45449	0.00151636	TRUE	FALSE	Upregulated
chr4:169401278-169401724	DDX60L	0.00324378	0.30451	0.301266	39	0.00981226	9.05448	75.1358	84.0579	0.159374	0.693092	TRUE	FALSE	NoDiff.
chr8:91013329-91014601	DECR1	0.0751183	0.301984	0.226866	84	0.000668406	14.0855	6102.55	5549.01	-0.137034	0.11649	TRUE	FALSE	NoDiff.
chr1:161101627-161102333	DEDD	0.0112655	0.396635	0.400908	32	0.00191034	12.441	2312.94	2181.24	-0.0843255	0.395856	FALSE	TRUE	NoDiff.
chr19:42720751-42722043	DEDD2	0.00378922	0.249898	0.242831	115	0.000791136	13.3307	767.691	770.926	0.00508868	0.969767	FALSE	FALSE	NoDiff.
chr16:90015145-90015615	DEF8	0.00379631	0.291283	0.300289	79	0.00340365	10.6517	4519.46	5418.03	0.261281	0.0484069	FALSE	FALSE	Upregulated
chr1:224370788-224371660	DEGS1	0.00581473	0.205933	0.214146	109	0.000271378	15.1352	2087.57	2303.12	0.14106	0.306367	TRUE	FALSE	NoDiff.
chr9:126691363-126692475	DENND1A	0.0357205	0.289188	0.253468	99	0.000271378	14.8353	1474.39	1107.38	-0.413646	0.00150359	TRUE	FALSE	Downregulated
chr1:197744086-197744929	DENND1B	0.03554	0.362566	0.327026	89	0.000271378	19.1841	1487.05	580.719	-1.35569	4.46097e-24	FALSE	TRUE	Downregulated
chr1:111745977-111747345	DENND2D	0.0186963	0.362688	0.340095	102	0.000271378	18.0547	2276.45	828.397	-1.45783	1.10918e-32	FALSE	TRUE	Downregulated
chr15:66083112-66085298	DENND4A	0.0583652	0.352637	0.297466	145	0.000271378	20.3325	1579.6	1880.07	0.25196	0.0807441	FALSE	FALSE	NoDiff.
chr9:19230063-19232026	DENND4C	0.0084565	0.416971	0.408653	148	0.000271378	22.1532	3099.61	1441.99	-1.1035	1.69677e-14	TRUE	TRUE	Downregulated
chr11:9285696-9287351	DENND5A	0.0513763	0.264023	0.21821	134	0.00718618	9.687	1812.93	949.504	-0.933822	4.81198e-18	TRUE	FALSE	Downregulated
chr12:31742979-31744706	DENND5B	0.00599999	0.278458	0.271481	205	0.000271378	20.251	248.712	236.25	-0.0744168	0.817156	TRUE	FALSE	NoDiff.
chr22:50765048-50765437	DENND6B	0.0327483	0.346793	0.321223	51	0.0218726	8.08546	393.904	612.085	0.637221	1.51606e-06	FALSE	FALSE	Upregulated
chr12:123236628-123237106	DENR	0.0124546	0.401417	0.388963	13	0.0363215	7.46405	11663.9	11930.7	0.0326289	0.740222	FALSE	TRUE	NoDiff.
chr12:100660981-100661366	DEPDC4	0.00411551	0.279621	0.275506	39	0.0398591	7.34847	144.683	206.094	0.515137	0.0506227	FALSE	TRUE	NoDiff.
chr12:16064029-16064387	DERA	0.00543728	0.247603	0.242165	38	0.00220229	11.9776	904.539	690.042	-0.391063	0.00106863	FALSE	FALSE	Downregulated
chr22:42016035-42016871	DESI1	0.0164384	0.248739	0.2323	42	0.00818561	9.47338	1515.54	2431.77	0.68139	2.08699e-09	FALSE	FALSE	Upregulated
chr1:244816408-244816980	DESI2	0.00179856	0.21031	0.208512	62	0.0540713	6.95147	2181.48	2771.97	0.345843	6.18068e-05	TRUE	FALSE	Upregulated
chr11:75479408-75479834	DGAT2	0.0148999	0.252174	0.237274	48	0.000271378	16.1714	428.88	1028.12	1.26326	3.93929e-08	FALSE	FALSE	Upregulated
chr22:18957599-18958867	DGCR5	0.0891839	0.375772	0.290859	132	0.00462779	10.3735	98.6015	208.54	1.07565	5.86524e-07	TRUE	FALSE	Upregulated
chr2:234262410-234262978	DGKD	0.0457875	0.277859	0.232072	29	0.00635215	9.92571	2198.6	3867.86	0.815056	2.70575e-18	TRUE	FALSE	Upregulated
chr17:54910364-54912307	DGKE	0.00719789	0.22826	0.221062	223	0.000271378	24.3935	3961.89	4054.25	0.033364	0.764076	FALSE	FALSE	NoDiff.
chr13:42614071-42615633	DGKH	0.00312162	0.388238	0.385116	191	0.000271378	26.8597	5203.78	2092.48	-1.31424	1.74153e-29	FALSE	TRUE	Downregulated
chr13:42621865-42623369	DGKH	0.00167246	0.456941	0.457479	140	0.000271378	30.1146	5203.78	2092.48	-1.31424	1.74153e-29	FALSE	TRUE	Downregulated
chr2:74208364-74208709	DGUOK-AS1	0.0498301	0.439726	0.389896	16	0.00238362	11.7078	232.864	241.059	0.0509361	0.835182	TRUE	FALSE	NoDiff.
chr1:55353149-55353374	DHCR24	0	0.201058	0.201058	19	0.0110736	8.92492	11810.1	9289.1	-0.346523	0.0235958	FALSE	FALSE	Downregulated
chr11:71157866-71159450	DHCR7	0.0955369	0.328203	0.232666	57	0.00305821	10.9239	15107.8	22045.3	0.545151	7.06275e-05	FALSE	FALSE	Upregulated
chr19:49436474-49437111	DHDH	0.0518176	0.368414	0.316597	42	0.00479912	10.2965	29.235	50.3904	0.793173	0.0412652	FALSE	FALSE	Upregulated
chr3:93781477-93781998	DHFRL1	0.00291994	0.204797	0.201877	38	0.000271378	17.1054	766.198	897.901	0.229784	0.284537	FALSE	FALSE	NoDiff.
chr17:27230297-27230589	DHRS13	0.107417	0.351332	0.243916	4	0.0408495	7.31706	664.08	717.832	0.11111	0.589106	FALSE	FALSE	NoDiff.
chr1:12676309-12679717	DHRS3	0.0715998	0.488769	0.416031	184	0.000271378	19.0614	419.802	408.384	-0.0402498	0.89533	TRUE	FALSE	NoDiff.
chr14:24422470-24422956	DHRS4	0.0670924	0.344697	0.277605	22	0.00220229	12.2056	3112.65	3056.75	-0.0259969	0.86527	TRUE	FALSE	NoDiff.
chr14:24505179-24505795	DHRS4L1	0.0138955	0.314115	0.30022	36	0.000271378	15.4388	327.395	279.126	-0.231003	0.198058	TRUE	FALSE	NoDiff.
chr14:60631722-60632256	DHRS7	0.00527527	0.259922	0.254646	56	0.000959715	13.0889	2776.49	3419.37	0.300904	0.00797883	FALSE	FALSE	Upregulated
chr10:12110991-12111676	DHTKD1	0.00823941	0.300354	0.292115	46	0.0406953	7.32599	8140.99	4735.47	-0.781824	3.39538e-09	FALSE	FALSE	Downregulated
chr3:47843715-47844321	DHX30	0.07587	0.313432	0.237562	33	0.0100631	9.03588	3409.94	3394.96	-0.00671807	0.963381	FALSE	FALSE	NoDiff.
chr12:122709912-122710378	DIABLO	0.0103508	0.366719	0.356368	28	0.00272278	11.1497	4579.7	4367.03	-0.0684612	0.450267	FALSE	FALSE	NoDiff.
chr5:140997343-140998509	DIAPH1	0.01309	0.230067	0.216977	61	0.00384605	10.59	10646.7	13948.9	0.389627	0.0159574	TRUE	TRUE	Upregulated
chr14:95624043-95624641	DICER1	0.053108	0.304516	0.251408	30	0.0189501	8.29113	11459.5	9627.4	-0.251362	0.002107	FALSE	FALSE	Downregulated
chr14:95622958-95623415	DICER1-AS1	0.00783344	0.237677	0.229844	43	0.000271378	15.0154	676.708	366.869	-0.880882	1.882e-07	FALSE	FALSE	Downregulated
chr20:61557260-61558538	DIDO1	0.0568666	0.271688	0.215471	132	0.000271378	18.8127	9829.47	9812.77	-0.00245478	0.981047	FALSE	FALSE	NoDiff.
chr20:61570456-61571005	DIDO1	0.0806745	0.285758	0.205083	12	0.00735049	9.64754	9829.47	9812.77	-0.00245478	0.981047	FALSE	FALSE	NoDiff.
chr21:47878975-47880123	DIP2A	0.0614271	0.300253	0.243021	75	0.00111136	12.8611	6024.63	7094.41	0.235808	0.00150943	TRUE	TRUE	Upregulated
chr12:50898859-50899800	DIP2B	0.0414685	0.467799	0.42633	57	0.000271378	23.9137	5367.61	4057.13	-0.403741	0.000493682	FALSE	FALSE	Downregulated
chr10:734268-736242	DIP2C	0.0269822	0.275719	0.251698	235	0.000271378	19.4961	2901.24	2661.44	-0.12392	0.178549	FALSE	FALSE	NoDiff.
chr19:2723021-2723351	DIRAS1	0.122647	0.58201	0.42819	21	0.0183444	8.32455	190.404	67.6301	-1.49645	2.89752e-10	FALSE	FALSE	Downregulated
chr9:93404794-93405285	DIRAS2	0.0470705	0.339075	0.292005	38	0.00770788	9.62923	98.546	41.265	-1.24925	0.00143498	TRUE	FALSE	Downregulated
chr15:66585646-66587115	DIS3L	0.0493526	0.409047	0.358936	111	0.000271378	16.5081	2030.04	673.813	-1.59075	1.25343e-69	FALSE	FALSE	Downregulated
chr11:111808063-111808431	DIXDC1	0.175205	0.393836	0.218631	17	0.0856934	6.33696	176.565	312.679	0.824704	3.2049e-05	FALSE	FALSE	Upregulated
chr11:111847575-111849136	DIXDC1	0.0614274	0.481416	0.4113	86	0.00272278	11.3746	176.565	312.679	0.824704	3.2049e-05	FALSE	FALSE	Upregulated
chr4:153455699-153458068	DKFZP434I0714	0.0207963	0.429669	0.412747	183	0.000271378	20.6733	393.838	186.654	-1.07391	3.38704e-08	TRUE	TRUE	Downregulated
chr10:54072920-54075615	DKK1	0.0163817	0.373083	0.356701	122	0.000271378	23.8249	5813.67	2029.39	-1.51815	1.96281e-33	TRUE	TRUE	Downregulated
chr19:49864412-49866494	DKKL1	0.035403	0.346551	0.311148	94	0.000271378	20.5583	33.7808	55.8162	0.725087	0.0997642	FALSE	TRUE	NoDiff.
chr8:12988750-12991756	DLC1	0.0476678	0.288616	0.241809	176	0.000271378	14.8229	2497.51	1747.77	-0.514714	1.46235e-05	TRUE	TRUE	Downregulated
chr13:50654595-50655839	DLEU1	0.00464327	0.314384	0.309741	86	0.000271378	14.7946	559.426	856.014	0.613983	1.38927e-05	FALSE	FALSE	Upregulated
chr13:50698229-50700557	DLEU2	0.00633259	0.398058	0.394029	251	0.000271378	19.2741	298.892	155.28	-0.942512	2.6362e-08	FALSE	TRUE	Downregulated
chr3:197024041-197025640	DLG1	0.0143428	0.393476	0.398976	138	0.000271378	22.6255	4942.21	2702.06	-0.870971	1.23906e-19	FALSE	TRUE	Downregulated
chr11:85338771-85339372	DLG2	0.000965251	0.269524	0.268559	28	0.000271378	15.9626	233.585	126.243	-0.883817	1.02719e-05	TRUE	FALSE	Downregulated
chrX:69671937-69673274	DLG3	0.0340132	0.263364	0.22935	55	0.00191034	12.474	4384.74	4509.44	0.0405911	0.71793	TRUE	FALSE	NoDiff.
chr17:7117735-7121230	DLG4	0.21083	0.490083	0.279054	98	0.00218775	12.3482	369.168	434.721	0.236423	0.146121	FALSE	TRUE	NoDiff.
chr17:7122846-7123994	DLG4	0.0294371	0.300644	0.271207	75	0.000791136	13.5605	369.168	434.721	0.236423	0.146121	FALSE	FALSE	NoDiff.
chr10:79686384-79687030	DLG5	0.0060254	0.53157	0.528163	84	0.000271378	17.1077	11050.4	6952.7	-0.668304	1.62829e-10	TRUE	TRUE	Downregulated
chr10:79686384-79687030	DLG5-AS1	0.0060254	0.53157	0.528163	84	0.000271378	17.1077	112.577	62.888	-0.845114	0.000846738	FALSE	TRUE	Downregulated
chr18:3593540-3594531	DLGAP1-AS1	0.00547058	0.455888	0.450418	19	0.000271378	19.3588	313.097	266.064	-0.23341	0.414144	TRUE	FALSE	NoDiff.
chr20:34894016-34894839	DLGAP4	0.169491	0.565658	0.379577	106	0.00444491	10.4322	2767.36	2947.53	0.0910989	0.344205	FALSE	TRUE	NoDiff.
chr20:35089106-35091374	DLGAP4	0.0706479	0.346024	0.27404	172	0.000791136	13.576	2767.36	2947.53	0.0910989	0.344205	FALSE	TRUE	NoDiff.
chr14:55658509-55658914	DLGAP5	0.00284091	0.323249	0.320408	14	0.00530159	10.2058	4320.04	1880.73	-1.19964	2.32874e-14	TRUE	FALSE	Downregulated
chr6:43422475-43424022	DLK2	0.0209178	0.330508	0.310717	146	0.000271378	17.6995	58.6361	161.271	1.45328	1.52366e-08	TRUE	FALSE	Upregulated
chr6:170598683-170600305	DLL1	0.0457739	0.418707	0.372933	166	0.000271378	30.0417	1374.03	376.666	-1.86682	1.58839e-42	TRUE	TRUE	Downregulated
chr15:41220038-41222986	DLL4	0.00944924	0.409874	0.401901	222	0.000271378	31.737	58.1908	51.4989	-0.1847	0.692384	FALSE	TRUE	NoDiff.
chr2:172949328-172950781	DLX1	0.0108171	0.459504	0.448687	113	0.000271378	24.496	711.132	314.322	-1.17972	6.7228e-13	TRUE	TRUE	Downregulated
chr2:172966969-172967740	DLX2	0	0.352224	0.351372	70	0.000668406	14.165	67.1908	187.834	1.47816	1.39366e-07	TRUE	FALSE	Upregulated
chr17:48072207-48073063	DLX3	0.0940621	0.503742	0.409679	42	0.000271378	14.7881	628.189	216.45	-1.53472	5.10658e-25	TRUE	TRUE	Downregulated
chr22:38965790-38967326	DMC1	0.0874124	0.405577	0.321186	88	0.000668406	14.15	159.473	100.832	-0.66428	0.0144137	FALSE	FALSE	Downregulated
chr19:36000309-36001618	DMKN	0.00745204	0.264615	0.257163	51	0.000791136	13.221	3091.5	3314.92	0.100586	0.420512	FALSE	FALSE	NoDiff.
chr19:36004699-36005266	DMKN	0.357708	0.635999	0.278291	17	0.0603565	6.81708	3091.5	3314.92	0.100586	0.420512	FALSE	TRUE	NoDiff.
chr19:46282590-46286427	DMPK	0.1301	0.50752	0.377853	100	0.000271378	18.8484	3039.59	2970.57	-0.0335024	0.844331	FALSE	TRUE	NoDiff.
chr9:22446471-22447341	DMRTA1	0.0561439	0.460075	0.403931	67	0.000271378	16.6657	528.694	325.047	-0.703076	1.65679e-06	FALSE	FALSE	Downregulated
chr5:118406852-118407350	DMXL1	0.00318471	0.253388	0.250203	53	0.000791136	13.1798	3701.58	4161.55	0.169273	0.205767	FALSE	FALSE	NoDiff.
chr15:51913998-51916003	DMXL2	0.0428067	0.360873	0.318067	138	0.000271378	27.3095	6105.58	2653.72	-1.2019	8.91004e-27	FALSE	FALSE	Downregulated
chr10:70231397-70231796	DNA2	0.00123762	0.201556	0.200319	37	0.0390452	7.3706	1733.89	1322.36	-0.391524	0.0176408	FALSE	FALSE	Downregulated
chr16:84177859-84178755	DNAAF1	0.0156548	0.366249	0.350594	70	0.000271378	16.1173	391.105	1108.73	1.50381	0.0280666	FALSE	TRUE	Upregulated
chr16:21170021-21171111	DNAH3	0.0266248	0.384646	0.358022	63	0.000271378	17.4116	574.473	409.231	-0.487256	0.00231277	FALSE	TRUE	Downregulated
chr9:34457188-34458169	DNAI1	0.0481754	0.487276	0.439101	63	0.000271378	21.0301	5.73742	544.275	6.57896	9.01918e-67	TRUE	FALSE	Upregulated
chr9:33025399-33026260	DNAJA1	0.00414095	0.377519	0.369316	46	0.000668406	13.756	10997.1	12678	0.205101	0.301708	TRUE	TRUE	NoDiff.
chr19:14628195-14628969	DNAJB1	0.00263791	0.296156	0.28762	70	0.00613238	10.0344	7379.31	6901.31	-0.0967793	0.524986	FALSE	FALSE	NoDiff.
chr19:14629529-14629772	DNAJB1	0.0860337	0.2934	0.207367	16	0.0560849	6.90535	7379.31	6901.31	-0.0967793	0.524986	FALSE	FALSE	NoDiff.
chr3:186287906-186288091	DNAJB11	0.00452489	0.265069	0.260544	12	0.0594709	6.84102	3602.22	2385.51	-0.594553	0.142614	TRUE	FALSE	NoDiff.
chr10:74114395-74114878	DNAJB12	0.00279821	0.278929	0.27613	46	0.000668406	13.8607	2692.54	1684.05	-0.676759	1.6961e-10	FALSE	FALSE	Downregulated
chr4:100867198-100867964	DNAJB14	0.00696126	0.384763	0.377801	72	0.00280792	11.0321	2848.51	2138.35	-0.413436	0.00164591	FALSE	FALSE	Downregulated
chr2:220142506-220142792	DNAJB2	0.0385484	0.348729	0.310181	13	0.00678448	9.78433	2273.12	918.057	-1.30824	1.12058e-20	FALSE	FALSE	Downregulated
chr9:34989704-34990398	DNAJB5	0.0573043	0.349635	0.323304	54	0.0267528	7.8451	325.258	405.924	0.320666	0.117863	FALSE	FALSE	NoDiff.
chr7:157128987-157129430	DNAJB6	0.0489727	0.276675	0.227703	46	0.00725794	9.65401	8530.21	7210.34	-0.242637	0.00772846	FALSE	FALSE	Downregulated
chr7:108208671-108208994	DNAJB9	0.121107	0.329623	0.208516	15	0.0130323	8.74329	1668.23	1486.76	-0.165961	0.697973	FALSE	FALSE	NoDiff.
chr2:183580747-183581888	DNAJC10	0.00903587	0.280041	0.271005	78	0.000791136	13.1475	4646.73	4596.05	-0.0156392	0.943849	FALSE	FALSE	NoDiff.
chr3:132136350-132137507	DNAJC13	0.00193666	0.237627	0.23569	52	0.000271378	38.5106	6686.92	5378.53	-0.313992	0.000646663	FALSE	TRUE	Downregulated
chr12:56223828-56224798	DNAJC14	0.0995308	0.483602	0.386421	51	0.00238362	11.6036	5367.09	4613.94	-0.21825	0.00222705	TRUE	FALSE	Downregulated
chr1:15851763-15852346	DNAJC16	0.0312297	0.250694	0.219465	19	0.0121866	8.80079	1155.85	1689.88	0.548467	1.07596e-05	FALSE	FALSE	Upregulated
chr12:49738861-49741816	DNAJC22	0.148198	0.490769	0.343482	204	0.000271378	18.4174	912.689	626.45	-0.542259	0.000225801	TRUE	TRUE	Downregulated
chr2:25193985-25195628	DNAJC27	0.00651602	0.247868	0.241352	116	0.000271378	15.5826	635.652	529.045	-0.263327	0.0402029	FALSE	TRUE	Downregulated
chr2:25193985-25195628	DNAJC27-AS1	0.00651602	0.247868	0.241352	116	0.000271378	15.5826	250.267	220.341	-0.180979	0.563749	TRUE	TRUE	NoDiff.
chr13:96329698-96330386	DNAJC3-AS1	0.00180505	0.282064	0.280259	37	0.00272278	11.3853	280.374	308.924	0.142997	0.63033	FALSE	FALSE	NoDiff.
chr11:63997663-63997868	DNAJC4	0.0379772	0.329611	0.291634	20	0.0726261	6.56703	891.831	1595.26	0.839625	5.63718e-11	FALSE	FALSE	Upregulated
chr1:65774867-65776058	DNAJC6	0.0324574	0.425256	0.391528	95	0.000271378	15.3556	679.316	1372.07	1.01286	2.52994e-14	TRUE	TRUE	Upregulated
chrX:153637579-153637877	DNASE1L1	0.00980392	0.306592	0.296788	18	0.01492	8.5968	3920.52	8778.36	1.16274	2.23881e-33	FALSE	FALSE	Upregulated
chrX:153640475-153640967	DNASE1L1	0.0790538	0.464903	0.385849	18	0.0530752	6.98869	3920.52	8778.36	1.16274	2.23881e-33	FALSE	TRUE	Upregulated
chr12:32832074-32832696	DNM1L	0.0043866	0.396267	0.388241	56	0.000791136	13.1432	3964.3	2366.7	-0.744067	4.51373e-12	FALSE	FALSE	Downregulated
chr10:101769173-101769879	DNMBP	0.00243902	0.218942	0.209712	93	0.00220229	12.1367	1969.84	1628.93	-0.273908	0.013618	TRUE	FALSE	Downregulated
chr19:10305509-10305863	DNMT1	0.00242718	0.222876	0.220449	40	0.00293094	10.9368	11163.5	4833.18	-1.20784	3.67394e-13	TRUE	FALSE	Downregulated
chr2:25474057-25475570	DNMT3A	0.0418868	0.568799	0.521467	99	0.000271378	20.9214	4933.46	42008.6	3.08976	3.67248e-224	TRUE	TRUE	Upregulated
chr2:25562895-25565575	DNMT3A	0.12795	0.495661	0.387988	334	0.000271378	21.1305	4933.46	42008.6	3.08976	3.67248e-224	TRUE	TRUE	Upregulated
chr20:31349556-31351532	DNMT3B	0.0489382	0.362228	0.316182	155	0.000271378	15.0045	1923.12	1020.57	-0.914332	3.4279e-08	FALSE	TRUE	Downregulated
chr6:43196620-43197369	DNPH1	0.0414513	0.372139	0.330687	76	0.000271378	15.2842	2132.48	1375.39	-0.633055	2.29534e-07	TRUE	FALSE	Downregulated
chr16:30022132-30023006	DOC2A	0.0786118	0.480792	0.40218	101	0.000271378	18.3116	2009.6	384.484	-2.38535	1.47793e-48	TRUE	TRUE	Downregulated
chr10:128593348-128595165	DOCK1	0.0684917	0.32295	0.25567	202	0.000271378	16.0099	3373.44	3229.31	-0.0625696	0.604091	TRUE	FALSE	NoDiff.
chr2:225906654-225907606	DOCK10	0.0130027	0.410222	0.397219	114	0.000271378	15.9547	350.07	55.2729	-2.67025	5.12866e-23	TRUE	FALSE	Downregulated
chrX:117629194-117631194	DOCK11	0.0874348	0.448437	0.358885	160	0.000271378	18.2562	114.352	20.0847	-2.5054	1.66918e-08	FALSE	TRUE	Downregulated
chr3:50712788-50713313	DOCK3	0.0908077	0.415364	0.324557	37	0.000791136	13.5035	639.767	742.159	0.215551	0.132514	TRUE	FALSE	NoDiff.
chr8:25041088-25043317	DOCK5	0.0124238	0.217316	0.204892	181	0.000791136	13.2046	3621.49	5624.1	0.635202	1.21933e-09	FALSE	FALSE	Upregulated
chr19:11372361-11373439	DOCK6	0.0497049	0.297126	0.274436	98	0.00238362	11.6749	5328.14	5057.09	-0.0751484	0.509567	FALSE	TRUE	NoDiff.
chr1:63153152-63154668	DOCK7	0.0122153	0.35267	0.33495	148	0.000271378	15.4648	2454.95	1007.98	-1.28489	1.29463e-45	FALSE	FALSE	Downregulated
chr9:214595-215561	DOCK8	0.0109712	0.230536	0.219565	115	0.000271378	15.4654	2218	2932.31	0.402765	0.00295029	FALSE	FALSE	Upregulated
chr13:99738243-99738971	DOCK9	0.014427	0.474535	0.441552	105	0.00582953	10.0933	1305.75	739.785	-0.821185	1.38599e-13	TRUE	TRUE	Downregulated
chr2:74781169-74781474	DOK1	0.114109	0.593714	0.479606	26	0.00818561	9.48723	590.019	875.551	0.568303	0.00030169	FALSE	TRUE	Upregulated
chr16:57519819-57520243	DOK4	0.0859425	0.336022	0.252728	23	0.0860702	6.33458	427.577	486.656	0.184014	0.357392	FALSE	TRUE	NoDiff.
chr4:3463182-3463715	DOK7	0.0892032	0.400925	0.311722	17	0.0340947	7.55136	1106.24	1222.17	0.14482	0.246128	TRUE	FALSE	NoDiff.
chr4:3485933-3487624	DOK7	0.0366644	0.361232	0.324568	80	0.00218775	12.3062	1106.24	1222.17	0.14482	0.246128	TRUE	FALSE	NoDiff.
chr6:83777582-83778148	DOPEY1	0.00759011	0.242136	0.235544	43	0.00444491	10.4795	1903.88	2865.31	0.590276	9.63698e-06	FALSE	FALSE	Upregulated
chr19:2164105-2165806	DOT1L	0.0129274	0.280041	0.263987	153	0.000271378	17.6066	2466.93	2223.94	-0.150135	0.323819	FALSE	TRUE	NoDiff.
chr11:118973022-118973612	DPAGT1	0.00337807	0.275135	0.271757	12	0.00635215	9.93282	5000.28	4351.43	-0.200298	0.0534505	TRUE	FALSE	NoDiff.
chr19:38714549-38715106	DPF1	0.00493197	0.29906	0.294128	57	0.000959715	13.0555	181.463	134.596	-0.434012	0.273273	FALSE	FALSE	NoDiff.
chr14:73359780-73360243	DPF3	0.0170464	0.245859	0.228813	45	0.000271378	14.832	61.2068	412.237	2.7565	7.91652e-47	FALSE	FALSE	Upregulated
chr2:162930376-162930856	DPP4	0.0173287	0.224648	0.207319	60	0.000791136	13.4555	65.4077	463.507	2.83418	1.94562e-31	TRUE	FALSE	Upregulated
chr9:140009055-140009659	DPP7	0.0809864	0.418374	0.333794	65	0.0196104	8.22523	3327.49	1886.69	-0.818533	2.05386e-18	FALSE	TRUE	Downregulated
chr7:35225121-35225825	DPY19L2P1	0.0302161	0.294468	0.264252	38	0.000271378	17.5994	391.35	315.704	-0.309486	0.0839735	TRUE	FALSE	NoDiff.
chr19:32896013-32896400	DPY19L3	0	0.203296	0.203296	37	0.0642217	6.72991	2268.62	4390.48	0.952913	7.78675e-17	FALSE	FALSE	Upregulated
chr8:95731799-95732745	DPY19L4	0.00327369	0.265186	0.261912	82	0.000271378	20.4829	5959.89	4145.62	-0.523604	1.65603e-07	TRUE	FALSE	Downregulated
chr1:98386051-98387373	DPYD	0.00778119	0.425904	0.418123	75	0.000271378	17.0318	727.07	461.775	-0.653586	0.00124639	TRUE	FALSE	Downregulated
chr8:26371428-26372008	DPYSL2	0.0128646	0.534258	0.517009	53	0.000959715	13.0093	2610.03	2421.25	-0.108579	0.572178	FALSE	TRUE	NoDiff.
chr8:26434373-26436490	DPYSL2	0.00402211	0.316307	0.311004	188	0.000271378	18.9168	2610.03	2421.25	-0.108579	0.572178	FALSE	FALSE	NoDiff.
chr10:133999054-134000961	DPYSL4	0.106742	0.318023	0.209025	216	0.00712248	9.71155	110.564	269.474	1.28304	9.99884e-14	FALSE	FALSE	Upregulated
chr2:27069312-27069721	DPYSL5	0.0918247	0.517512	0.425687	16	0.00499677	10.2832	257.026	68.9022	-1.90131	6.71147e-11	FALSE	TRUE	Downregulated
chr12:102271036-102272177	DRAM1	0.0797441	0.317995	0.23825	99	0.000791136	13.3474	1563.75	2132.17	0.447736	0.0051115	TRUE	FALSE	Upregulated
chr1:111681994-111683268	DRAM2	0.00341089	0.225332	0.221921	96	0.000668406	13.8844	1091.88	794.386	-0.457696	0.00983484	FALSE	FALSE	Downregulated
chr11:65686727-65687892	DRAP1	0.0293722	0.398472	0.369099	106	0.000271378	16.9404	3944.45	3399.12	-0.214975	0.21911	FALSE	TRUE	NoDiff.
chr2:26624604-26625020	DRC1	0.00516816	0.233446	0.228277	41	0.000271378	15.5294	3.34661	85.5152	4.67182	7.59469e-21	FALSE	FALSE	Upregulated
chr5:174871380-174871832	DRD1	0.101059	0.318743	0.217685	50	0.0497752	7.06019	158.284	117.85	-0.423449	0.090969	FALSE	FALSE	NoDiff.
chr18:28681255-28682358	DSC2	0.062385	0.474367	0.411982	98	0.000271378	18.2813	507.006	481.226	-0.0758579	0.677835	TRUE	FALSE	NoDiff.
chr11:117667720-117668006	DSCAML1	0.311225	0.659937	0.348712	29	0.0343847	7.54486	124.775	140.658	0.170101	0.473354	FALSE	FALSE	NoDiff.
chr6:116599891-116600919	DSE	0.0240094	0.406731	0.382722	59	0.000271378	20.0376	401.777	266.547	-0.589538	0.00134027	TRUE	TRUE	Downregulated
chr6:116691840-116692673	DSE	0.0320923	0.575136	0.543043	106	0.000271378	22.261	401.777	266.547	-0.589538	0.00134027	TRUE	TRUE	Downregulated
chr18:29077816-29078702	DSG2	0.0134804	0.458263	0.444198	87	0.000271378	18.7249	6209.68	1162.76	-2.41733	9.29597e-131	FALSE	TRUE	Downregulated
chr6:7541317-7542784	DSP	0.00887703	0.271424	0.265692	151	0.000271378	19.6633	32743.9	24456.8	-0.420955	0.0110515	FALSE	FALSE	Downregulated
chr6:56707636-56709057	DST	0.00866064	0.604901	0.597507	121	0.000271378	24.5485	6293.14	10067.6	0.678049	1.03295e-06	FALSE	TRUE	Upregulated
chr6:56818459-56821004	DST	0.0364174	0.370686	0.331818	205	0.000271378	23.8885	6293.14	10067.6	0.678049	1.03295e-06	FALSE	FALSE	Upregulated
chr20:17549725-17550768	DSTN	0.00437346	0.633929	0.628628	71	0.000271378	28.1493	17246.7	7217.64	-1.25672	1.70178e-42	FALSE	TRUE	Downregulated
chr1:205179941-205180699	DSTYK	0.00362328	0.435961	0.432338	77	0.000271378	25.6813	4583.38	1643.15	-1.47998	2.56149e-56	FALSE	TRUE	Downregulated
chr18:32073016-32074650	DTNA	0.0032412	0.431378	0.428137	139	0.000271378	27.0459	3962.29	3298.5	-0.26442	0.0138973	FALSE	TRUE	Downregulated
chr2:25895727-25896680	DTNB	0.00713548	0.255019	0.247883	131	0.000791136	13.285	1027.63	873.375	-0.235401	0.0620397	FALSE	FALSE	NoDiff.
chr12:57998192-57999266	DTX3	0.047465	0.443468	0.396003	59	0.00330477	10.7263	2454.19	550.902	-2.15364	6.46386e-87	TRUE	TRUE	Downregulated
chr3:122283003-122283583	DTX3L	0.0180918	0.403944	0.385852	50	0.00111136	12.8217	1208.2	684.671	-0.819213	1.17263e-06	TRUE	FALSE	Downregulated
chr11:58939151-58939955	DTX4	0.012547	0.23835	0.223828	78	0.0253146	7.90537	473.767	716.506	0.595085	0.00177694	TRUE	FALSE	Upregulated
chr2:242626463-242626874	DTYMK	0.0030581	0.214336	0.211278	47	0.00191034	12.4552	3370.79	1998.39	-0.754531	4.32878e-05	TRUE	FALSE	Downregulated
chr7:107203806-107204135	DUS4L	0.00204082	0.202424	0.200384	14	0.00191034	12.4396	881.27	553.83	-0.668985	3.66223e-05	FALSE	FALSE	Downregulated
chr5:172198231-172199547	DUSP1	0.00703295	0.353733	0.3467	104	0.000271378	19.3889	4131.07	2297.21	-0.846593	0.000465605	FALSE	TRUE	Downregulated
chr1:221916529-221916861	DUSP10	0.00674759	0.342384	0.335636	32	0.00218775	12.217	294.413	484.46	0.717666	0.00084658	TRUE	FALSE	Upregulated
chr17:35849043-35852117	DUSP14	0.0862681	0.427465	0.335199	199	0.000271378	17.8128	974.24	524.022	-0.89639	3.33684e-13	FALSE	FALSE	Downregulated
chr20:30457613-30458363	DUSP15	0.130437	0.437	0.306563	63	0.000271378	15.6836	22.3495	65.8042	1.55445	4.8902e-07	FALSE	TRUE	Upregulated
chr12:12714930-12716419	DUSP16	0.0863885	0.434889	0.345067	112	0.000791136	13.6704	3107.68	2568.3	-0.274707	0.0939829	FALSE	TRUE	NoDiff.
chr6:292102-292964	DUSP22	0.255082	0.553044	0.297962	98	0.0379137	7.42271	1129.94	511.103	-1.14293	2.99211e-24	FALSE	FALSE	Downregulated
chr1:159750928-159751542	DUSP23	0.0876232	0.357746	0.270123	41	0.00678448	9.77968	834.124	564.001	-0.565664	0.000489893	FALSE	FALSE	Downregulated
chr8:29205929-29209207	DUSP4	0.00482687	0.43031	0.425354	303	0.000271378	30.3102	1359.42	420.224	-1.69413	2.72359e-21	FALSE	TRUE	Downregulated
chr12:89746101-89748650	DUSP6	0.0179988	0.392686	0.374687	174	0.000271378	29.5161	74.1297	58.0255	-0.346498	0.316391	TRUE	FALSE	NoDiff.
chr11:1594152-1595652	DUSP8	0.0180776	0.415659	0.396469	73	0.00582953	10.0663	821.896	857.745	0.0599845	0.752458	FALSE	TRUE	NoDiff.
chr15:48623512-48624544	DUT	0	0.272439	0.27858	99	0.00272278	11.2838	2517.73	1570.65	-0.681234	8.26951e-09	FALSE	FALSE	Downregulated
chr1:1285126-1285304	DVL1	0	0.399687	0.398374	27	0.00518925	10.2359	1680.1	2068.43	0.29938	0.000532372	FALSE	TRUE	Upregulated
chr2:172544323-172544937	DYNC1I2	0.00646243	0.225648	0.219186	31	0.00111136	12.873	5177.34	4672.33	-0.148069	0.0588648	FALSE	FALSE	NoDiff.
chr11:102980178-102980951	DYNC2H1	0.00580601	0.323041	0.317235	39	0.00238362	11.5743	987.102	839.636	-0.232288	0.165244	TRUE	FALSE	NoDiff.
chr12:120905962-120907622	DYNLL1	0.0579546	0.286034	0.228079	143	0.000271378	19.6427	10850.5	17712.7	0.706934	8.96318e-07	FALSE	FALSE	Upregulated
chr17:56160532-56161720	DYNLL2	0.00768013	0.462845	0.455165	137	0.000271378	24.5343	20266.3	7141.83	-1.50476	1.21948e-25	FALSE	TRUE	Downregulated
chr21:38737603-38738689	DYRK1A	0.0374614	0.348731	0.305244	90	0.00234522	11.8217	4632.63	3972.79	-0.221481	0.0479454	FALSE	FALSE	Downregulated
chr19:40323813-40324898	DYRK1B	0.00698791	0.209313	0.207521	79	0.0138094	8.6928	964.604	415.941	-1.21185	1.10202e-16	FALSE	TRUE	Downregulated
chr12:68041532-68044159	DYRK2	0.0242791	0.435731	0.410666	256	0.000271378	32.6335	2897.82	1296.14	-1.16118	2.9862e-18	FALSE	TRUE	Downregulated
chr1:206808891-206809465	DYRK3	0.0376481	0.494596	0.456948	47	0.000271378	20.3871	66.838	78.9592	0.241605	0.417366	FALSE	TRUE	NoDiff.
chr2:71693659-71694347	DYSF	0.0551151	0.346905	0.29179	51	0.000791136	13.5874	30.203	86.8571	1.52193	1.36687e-06	FALSE	FALSE	Upregulated
chr3:108307848-108307946	DZIP3	0	0.233564	0.233564	5	0.0091267	9.17927	2721.86	3908.03	0.522267	0.00145674	FALSE	FALSE	Upregulated
chr6:20402225-20405047	E2F3	0.00661508	0.554303	0.533726	212	0.000271378	31.2219	3159.01	865.643	-1.86808	2.03869e-21	FALSE	TRUE	Downregulated
chr8:86089020-86090135	E2F5	0.00642608	0.45173	0.445304	118	0.000271378	28.5338	622.792	183.897	-1.75957	4.43746e-37	FALSE	TRUE	Downregulated
chr2:11605091-11606178	E2F6	0.116644	0.333562	0.216918	67	0.00712248	9.70451	3365.18	1966.64	-0.774988	2.96192e-14	TRUE	FALSE	Downregulated
chr12:77458584-77459941	E2F7	0.0282178	0.41025	0.382033	112	0.000271378	23.2368	1799.06	585.286	-1.62079	4.26282e-14	FALSE	FALSE	Downregulated
chr3:121554166-121554796	EAF2	0.0199397	0.270908	0.250968	22	0.010418	8.966	85.2737	387.459	2.18215	1.68486e-30	TRUE	FALSE	Upregulated
chr20:2673431-2674697	EBF4	0.157055	0.492756	0.299571	183	0.066796	6.67958	148.285	257.47	0.798757	0.0253172	FALSE	FALSE	Upregulated
chr9:37080044-37080648	EBLN3	0.00871049	0.224347	0.215636	49	0.00462779	10.3678	3970.75	7178.03	0.854499	1.2651e-08	FALSE	FALSE	Upregulated
chr10:74927888-74928426	ECD	0.00271739	0.387138	0.38442	31	0.00621285	10.0006	2207.54	1981.72	-0.155753	0.145954	FALSE	TRUE	NoDiff.
chr6:127664282-127665028	ECHDC1	0.004681	0.249317	0.244636	59	0.000271378	14.9661	3547.95	2471.87	-0.521326	1.2276e-06	TRUE	FALSE	Downregulated
chr1:53387085-53387733	ECHDC2	0.0414824	0.429094	0.39141	48	0.000271378	17.7345	1003.44	319.205	-1.65234	4.57134e-32	FALSE	FALSE	Downregulated
chr6:4136108-4136564	ECI2	0.0118531	0.22634	0.221014	45	0.024061	7.97858	1106.83	2175.25	0.975392	5.40702e-29	FALSE	FALSE	Upregulated
chrX:68835649-68836716	EDA	0	0.316908	0.330439	82	0.000271378	15.4012	263.157	261.321	-0.0102972	0.95352	FALSE	FALSE	NoDiff.
chr9:139759578-139760780	EDF1	0.123361	0.431278	0.290422	60	0.0277425	7.81126	12079.6	9506.63	-0.345472	1.51897e-05	FALSE	FALSE	Downregulated
chr6:12287592-12292244	EDN1	0.0500519	0.332166	0.282115	110	0.000271378	19.5633	585.863	597.361	0.0280038	0.958889	FALSE	TRUE	NoDiff.
chr12:93322516-93323065	EEA1	0.00184843	0.336036	0.334188	71	0.00238362	11.7874	2968.26	3125.99	0.0749807	0.627144	FALSE	FALSE	NoDiff.
chr11:85955420-85956846	EED	0.00317437	0.232693	0.229519	95	0.000271378	20.7851	3617.95	3156.09	-0.197337	0.157607	FALSE	FALSE	NoDiff.
chr20:62128666-62130943	EEF1A2	0.10222	0.476267	0.373623	169	0.000271378	18.4999	44154.1	18284.2	-1.27193	1.04894e-21	FALSE	TRUE	Downregulated
chr8:144680487-144681152	EEF1D	0.0925185	0.341781	0.249263	76	0.00272278	11.1123	22253.2	31015.1	0.478992	2.61103e-07	FALSE	FALSE	Upregulated
chr11:62342161-62342899	EEF1G	0.153518	0.444969	0.291451	34	0.00220229	11.9047	90891.2	90982.7	0.00146394	0.992267	TRUE	FALSE	NoDiff.
chr19:3986289-3987070	EEF2	0.0102774	0.4387	0.428423	23	0.000271378	19.7752	129200	143439	0.150838	0.360566	TRUE	FALSE	NoDiff.
chr16:22217667-22218535	EEF2K	0.00227273	0.283679	0.281406	67	0.000271378	18.2091	2988.57	3642.71	0.285569	0.000326302	FALSE	FALSE	Upregulated
chr16:5148730-5149431	EEF2KMT	0.0295884	0.27215	0.242562	24	0.00652302	9.8223	692.637	626.388	-0.146786	0.419828	FALSE	FALSE	NoDiff.
chr3:127872092-127873355	EEFSEC	0.0175567	0.351725	0.334168	102	0.000271378	20.258	816.534	586.373	-0.479055	0.00355429	FALSE	FALSE	Downregulated
chr7:36192776-36193381	EEPD1	0.00735925	0.214894	0.207535	75	0.000500314	14.4853	181.598	332.096	0.86606	9.41742e-05	FALSE	FALSE	Upregulated
chr17:45400771-45402279	EFCAB13	0.0265814	0.232876	0.206295	95	0.000791136	13.618	548.601	582.102	0.0865625	0.671057	TRUE	FALSE	NoDiff.
chr1:245132941-245134912	EFCAB2	0.00216889	0.466731	0.462704	171	0.000271378	31.9902	529.446	112.921	-2.22971	4.91193e-50	TRUE	TRUE	Downregulated
chr1:63988429-63988716	EFCAB7	0.0143	0.215606	0.201306	13	0.013184	8.7349	253.357	377.248	0.573196	9.94299e-06	FALSE	FALSE	Upregulated
chr2:56150549-56151388	EFEMP1	0.0319216	0.447984	0.416062	59	0.000271378	17.9019	994.717	292.132	-1.76995	6.51286e-32	FALSE	TRUE	Downregulated
chr11:65640738-65641164	EFEMP2	0.0304466	0.341251	0.310804	26	0.0184623	8.31712	100.125	135.541	0.438666	0.0357116	FALSE	TRUE	Upregulated
chr6:52284109-52284958	EFHC1	0.337131	0.637243	0.300113	31	0.0633865	6.7547	1563.06	2262.3	0.534001	0.000299041	FALSE	TRUE	Upregulated
chr2:233497621-233498534	EFHD1	0.0332322	0.495027	0.461795	92	0.000271378	22.4887	2472.51	2045.16	-0.273348	0.157133	FALSE	FALSE	NoDiff.
chr1:15735597-15736607	EFHD2	0.151609	0.383572	0.206682	97	0.00725794	9.6585	957.421	719.137	-0.41429	0.0625286	TRUE	FALSE	NoDiff.
chr1:155098965-155103288	EFNA1	0.0256909	0.44152	0.415829	168	0.000271378	25.384	3505.46	2257.08	-0.634835	1.01314e-05	FALSE	TRUE	Downregulated
chr19:1286223-1286294	EFNA2	0.032563	0.603641	0.587411	16	0.019526	8.25995	78.6998	30.5806	-1.36652	0.000646413	FALSE	FALSE	Downregulated
chr1:155051055-155053598	EFNA3	0.0300552	0.3586	0.328964	201	0.000271378	21.7955	653.424	1270.8	0.958919	2.78024e-16	TRUE	TRUE	Upregulated
chr1:155034395-155036961	EFNA4	0.113353	0.418534	0.305182	158	0.000271378	16.2422	599.834	514.342	-0.222857	0.1063	FALSE	TRUE	NoDiff.
chr5:107006147-107007948	EFNA5	0.00791346	0.29259	0.284676	139	0.000271378	24.8252	1658.29	1652.83	-0.00550801	0.978243	TRUE	FALSE	NoDiff.
chr13:107186393-107187291	EFNB2	0.00316082	0.352981	0.350282	89	0.000500314	14.7452	2527.13	2761.26	0.127393	0.25543	TRUE	FALSE	NoDiff.
chr17:7607923-7608765	EFNB3	0.060704	0.51952	0.467441	65	0.000500314	14.7372	525.096	244.166	-1.1024	3.81492e-15	TRUE	TRUE	Downregulated
chr2:25264385-25264766	EFR3B	0.00606725	0.224287	0.21822	17	0.0082215	9.43094	1844.61	2836.13	0.620005	0.00219699	TRUE	FALSE	Upregulated
chr9:139560354-139561144	EGFL7	0.0777242	0.431521	0.33932	92	0.0256239	7.89773	724.062	406.7	-0.833414	9.76771e-05	FALSE	TRUE	Downregulated
chr7:55086465-55087120	EGFR	0.0120588	0.46789	0.457167	89	0.000271378	16.4122	164.734	50.3623	-1.71291	4.86747e-10	TRUE	TRUE	Downregulated
chr19:41303871-41304241	EGLN2	0.168694	0.374204	0.20551	15	0.0822475	6.39337	809	783.959	-0.0457608	0.777746	FALSE	FALSE	NoDiff.
chr5:137799276-137800678	EGR1	0.0593578	0.516816	0.447816	91	0.00272278	11.2433	22728.4	24656.5	0.117476	0.847038	FALSE	TRUE	NoDiff.
chr10:64576682-64577865	EGR2	0.0135434	0.341206	0.328093	75	0.000271378	16.0326	134.809	393.998	1.54692	0.118909	FALSE	FALSE	NoDiff.
chr10:64578558-64578978	EGR2	0.197113	0.525	0.321688	38	0.0100631	9.04067	134.809	393.998	1.54692	0.118909	FALSE	FALSE	NoDiff.
chr8:22548882-22552821	EGR3	0.0183543	0.506338	0.488572	322	0.000271378	36.2889	1575.52	1081.49	-0.542765	0.571204	FALSE	TRUE	NoDiff.
chr2:62932096-62932375	EHBP1	0.0503608	0.310116	0.259756	11	0.0361104	7.48456	2440.41	1753.59	-0.476745	1.41789e-07	TRUE	FALSE	Downregulated
chr11:65341484-65343929	EHBP1L1	0.0472737	0.30911	0.260113	187	0.000271378	19.232	4630.68	4075.77	-0.184388	0.259067	TRUE	TRUE	NoDiff.
chr11:64646485-64647117	EHD1	0.0707275	0.35153	0.280802	28	0.00330477	10.7082	3049.27	6190.78	1.02127	5.97557e-15	FALSE	FALSE	Upregulated
chr19:48216554-48217011	EHD2	0.349614	0.623232	0.273618	35	0.0442638	7.21436	591.767	173.778	-1.76961	8.81806e-24	TRUE	TRUE	Downregulated
chr2:31457058-31457480	EHD3	0.00396825	0.319862	0.320425	36	0.000271378	15.3455	416.506	1741.66	2.06138	4.66912e-47	TRUE	TRUE	Upregulated
chr3:184971642-184972088	EHHADH	0.00235982	0.436917	0.434557	44	0.000791136	13.209	597.512	298.198	-1.00359	1.30486e-12	FALSE	FALSE	Downregulated
chr9:140512464-140512931	EHMT1	0.02861	0.301229	0.272619	21	0.00969814	9.09169	5970.09	6664.37	0.158601	0.0455041	FALSE	FALSE	Upregulated
chr6:31864666-31865794	EHMT2	0.0282822	0.352556	0.325119	97	0.000271378	16.1708	6608.39	3442.26	-0.941122	3.82119e-13	FALSE	TRUE	Downregulated
chr11:125438711-125439273	EI24	0.137566	0.471138	0.327802	29	0.0355256	7.50308	4288.09	3079.76	-0.477704	1.18679e-07	FALSE	FALSE	Downregulated
chr15:49170445-49170766	EID1	0.0130993	0.25263	0.239531	24	0.0201711	8.19484	5006.52	4747.44	-0.0768256	0.427765	TRUE	FALSE	NoDiff.
chr11:65770039-65770876	EIF1AD	0.0311965	0.28653	0.255333	49	0.000271378	17.2103	3427.11	3922.05	0.194374	0.0193092	FALSE	FALSE	Upregulated
chr3:40351380-40351943	EIF1B-AS1	0.00441501	0.252969	0.248554	44	0.00479912	10.303	40.7445	51.3969	0.343674	0.513828	FALSE	FALSE	NoDiff.
chr2:37383149-37384401	EIF2AK2	0.102552	0.334659	0.232107	73	0.000791136	13.0985	2774.85	2679.6	-0.0506116	0.771816	TRUE	FALSE	NoDiff.
chr3:183851650-183853580	EIF2B5	0.00563207	0.243803	0.238171	106	0.000500314	14.5425	2877.84	2956.29	0.0386107	0.743983	FALSE	FALSE	NoDiff.
chrX:24071262-24071790	EIF2S3	0.295213	0.492913	0.201408	17	0.069846	6.61738	19510.7	15214	-0.358803	0.0321622	TRUE	FALSE	Downregulated
chr15:44828547-44830135	EIF3J	0.00198639	0.246325	0.245025	149	0.00218775	12.2157	4334.78	2801.17	-0.63017	2.18921e-10	FALSE	FALSE	Downregulated
chr15:44828547-44830135	EIF3J-AS1	0.00198639	0.246325	0.245025	149	0.00218775	12.2157	396.717	288.016	-0.458867	0.00966684	FALSE	FALSE	Downregulated
chr17:78121482-78122030	EIF4A3	0.00717703	0.300504	0.293327	25	0.00191034	12.4565	7203.65	9754.4	0.437165	6.54001e-05	FALSE	FALSE	Upregulated
chr12:53400200-53400805	EIF4B	0.0026455	0.336641	0.333995	47	0.000271378	17.6166	69477.3	39640.9	-0.80953	1.11672e-05	FALSE	TRUE	Downregulated
chr4:99849247-99850067	EIF4E	0.0079384	0.417537	0.409599	63	0.000271378	20.7097	5165.25	4687.72	-0.140141	0.153225	FALSE	TRUE	NoDiff.
chr5:176057372-176057813	EIF4E1B	0.0382024	0.294893	0.256691	51	0.00828857	9.42909	2.22902	58.6871	4.67323	1.62383e-13	FALSE	FALSE	Upregulated
chr2:233415311-233416233	EIF4E2	0.00759319	0.348063	0.336525	66	0.000271378	14.9868	7038.14	4841.65	-0.539961	1.67684e-11	FALSE	FALSE	Downregulated
chr3:71774636-71774842	EIF4E3	0.0857068	0.523311	0.437604	28	0.0134296	8.72832	1244.33	736.92	-0.756226	2.6733e-13	TRUE	FALSE	Downregulated
chr3:71802436-71802964	EIF4E3	0.0378558	0.254623	0.216767	69	0.00401987	10.5426	1244.33	736.92	-0.756226	2.6733e-13	TRUE	FALSE	Downregulated
chr8:37887424-37889334	EIF4EBP1	0.0246329	0.340822	0.31733	146	0.000500314	14.6967	1483.34	558.841	-1.40815	9.2077e-17	TRUE	FALSE	Downregulated
chr22:31885061-31886030	EIF4ENIF1	0.00190777	0.28198	0.280002	119	0.000668406	13.7651	1929.35	1168.72	-0.723398	4.43292e-15	FALSE	FALSE	Downregulated
chr3:184032575-184034293	EIF4G1	0.0298085	0.346707	0.312214	98	0.00778727	9.61215	27750.3	24966.5	-0.152557	0.282344	FALSE	FALSE	NoDiff.
chr3:184037289-184038016	EIF4G1	0.407798	0.738543	0.330746	14	0.0865973	6.32853	27750.3	24966.5	-0.152557	0.282344	FALSE	FALSE	NoDiff.
chr11:10829325-10829619	EIF4G2	0.00409836	0.397356	0.393258	22	0.00272278	11.1201	40521.4	41289.9	0.0270665	0.83494	TRUE	FALSE	NoDiff.
chr11:10830655-10831267	EIF4G2	0.003861	0.327669	0.3207	40	0.0250515	7.92427	40521.4	41289.9	0.0270665	0.83494	TRUE	FALSE	NoDiff.
chr1:21501987-21502739	EIF4G3	0.00512821	0.362629	0.3575	29	0.00941507	9.13811	6239.69	6987.65	0.163289	0.0475051	TRUE	FALSE	Upregulated
chr17:7211068-7212489	EIF5A	0.00324831	0.335485	0.329031	105	0.000271378	18.0107	26170.3	18953.5	-0.465521	0.0018514	FALSE	TRUE	Downregulated
chr3:170626049-170626482	EIF5A2	0.0115866	0.224593	0.213006	41	0.000500314	14.6134	611.983	630.802	0.0415695	0.850231	TRUE	FALSE	NoDiff.
chr9:23821275-23821641	ELAVL2	0.271332	0.500801	0.229469	39	0.070349	6.60646	100.384	38.7931	-1.37159	4.32524e-06	FALSE	FALSE	Downregulated
chr13:41592987-41593582	ELF1	0.00983705	0.212622	0.202785	4	0.0388136	7.39376	6965.99	5291.67	-0.396382	0.0022801	FALSE	FALSE	Downregulated
chr4:140004180-140005468	ELF2	0.000660502	0.332889	0.332229	86	0.000271378	20.3976	2389.41	1238.64	-0.947218	7.62035e-25	FALSE	TRUE	Downregulated
chr1:201979731-201982220	ELF3	0.085778	0.34407	0.258292	59	0.0335111	7.57215	9837.79	10834	0.139186	0.447309	TRUE	FALSE	NoDiff.
chrX:129242651-129244911	ELF4	0.0222857	0.387346	0.356971	170	0.000271378	18.0796	3135.22	937.69	-1.7417	5.94429e-28	FALSE	TRUE	Downregulated
chr11:34535023-34535481	ELF5	0.254514	0.526849	0.272336	19	0.0651842	6.71503	124.734	426.673	1.77929	3.01351e-28	TRUE	FALSE	Upregulated
chrX:47508844-47509975	ELK1	0.0506795	0.395667	0.344988	49	0.000500314	14.6021	2496.15	1633.57	-0.612165	1.54965e-10	FALSE	TRUE	Downregulated
chr12:96587671-96589510	ELK3	0.0535911	0.368486	0.316783	150	0.000271378	18.3391	559.866	286.015	-0.970429	3.72714e-08	FALSE	TRUE	Downregulated
chr14:74253181-74254418	ELMSAN1	0.0077512	0.258643	0.250891	114	0.000271378	18.4368	8135.23	10598.2	0.381389	7.09258e-05	TRUE	FALSE	Upregulated
chr1:43831867-43834196	ELOVL1	0.0154977	0.53058	0.528639	119	0.000271378	20.99	3749.07	2171.65	-0.78804	1.22286e-06	FALSE	TRUE	Downregulated
chr6:80655993-80657683	ELOVL4	0.0285783	0.427164	0.409622	119	0.000271378	19.4476	486.722	77.0366	-2.65494	3.87264e-65	FALSE	TRUE	Downregulated
chr4:111117931-111120454	ELOVL6	0.0123901	0.504905	0.492515	159	0.000271378	29.6961	3636.89	827.417	-2.13631	1.5724e-57	TRUE	TRUE	Downregulated
chr5:60138960-60140779	ELOVL7	0.0395828	0.40404	0.364457	152	0.000271378	20.308	2322.48	1528.74	-0.603068	7.09472e-08	TRUE	TRUE	Downregulated
chr18:33708230-33709425	ELP2	0.0093239	0.237259	0.227935	84	0.000271378	18.1364	9068.55	6130.02	-0.564847	0.00078927	TRUE	FALSE	Downregulated
chr17:7154001-7154915	ELP5	0.0256105	0.342289	0.308852	56	0.0214407	8.12293	1994.33	1911.45	-0.0614162	0.567125	TRUE	FALSE	NoDiff.
chr5:49736443-49737641	EMB	0.00956395	0.369297	0.359733	89	0.000271378	19.1051	3882.9	3008.54	-0.367941	0.00447866	TRUE	FALSE	Downregulated
chr16:85833773-85834251	EMC8	0.048396	0.258851	0.210455	17	0.0116262	8.86094	2923.74	2338.18	-0.322855	0.0134078	TRUE	FALSE	Downregulated
chr14:24609848-24610788	EMC9	0.00317055	0.234693	0.231522	66	0.000791136	13.2624	1797.48	1027.26	-0.807115	4.74424e-14	TRUE	FALSE	Downregulated
chr16:1821322-1822878	EME2	0.0155471	0.349665	0.334118	137	0.000271378	23.69	872.261	1434.88	0.718823	2.49235e-12	FALSE	FALSE	Upregulated
chr12:7078214-7078780	EMG1	0.252763	0.594416	0.341653	7	0.0406067	7.32904	1704.64	1410.13	-0.274202	0.106052	FALSE	FALSE	NoDiff.
chr22:29602002-29602467	EMID1	0.0439016	0.403014	0.359112	40	0.00424989	10.4831	164.479	151.342	-0.119275	0.598922	FALSE	FALSE	NoDiff.
chr14:100259416-100260331	EML1	0.00426245	0.205377	0.201114	139	0.000271378	17.9109	1913.27	4094.86	1.09793	7.35046e-59	FALSE	FALSE	Upregulated
chr19:46149341-46149758	EML2	0.110684	0.363095	0.252411	17	0.0818333	6.39806	2594.48	2544.22	-0.0277637	0.860324	FALSE	FALSE	NoDiff.
chr19:46144947-46146138	EML2-AS1	0.0847626	0.340269	0.254846	78	0.00800283	9.57845	93.3984	343.113	1.88249	3.75202e-09	FALSE	FALSE	Upregulated
chr11:62378600-62380534	EML3	0.0696118	0.455141	0.3848	132	0.000271378	18.1425	2947.28	2192.53	-0.427118	0.0105527	TRUE	TRUE	Downregulated
chr2:54950534-54951283	EML6	0.00262697	0.232945	0.230318	81	0.00238362	11.6961	233.711	488.947	1.06441	1.80172e-12	FALSE	FALSE	Upregulated
chr16:10671101-10675140	EMP2	0.0855078	0.450555	0.365048	154	0.000271378	24.6292	33753.4	7988.57	-2.07895	1.04155e-72	TRUE	TRUE	Downregulated
chr7:155249398-155249961	EN2	0.266353	0.559124	0.292771	32	0.0103178	8.99797	338.197	261.851	-0.371845	0.0525148	FALSE	FALSE	NoDiff.
chr1:225839966-225841605	ENAH	0.00428745	0.493986	0.490387	173	0.000271378	26.0781	6697.99	848.811	-2.98038	2.57621e-140	FALSE	TRUE	Downregulated
chr5:73935756-73937389	ENC1	0.00815244	0.413205	0.405053	147	0.000271378	24.1505	3495.88	1166.65	-1.58335	9.80418e-35	TRUE	TRUE	Downregulated
chr16:67701795-67702227	ENKD1	0.0962916	0.539915	0.443624	15	0.00800283	9.56244	467.413	307.618	-0.605228	0.00141134	FALSE	TRUE	Downregulated
chr12:7023667-7024914	ENO2	0.163069	0.59224	0.429171	77	0.000791136	13.1495	1369.61	294.676	-2.21748	1.69592e-38	TRUE	TRUE	Downregulated
chr17:4849968-4852569	ENO3	0.0104212	0.343696	0.333274	170	0.000271378	22.0954	599.506	454.187	-0.401331	0.001509	FALSE	TRUE	Downregulated
chr10:118608738-118609547	ENO4	0.0611643	0.375223	0.314058	57	0.000791136	13.2639	138.627	44.0373	-1.6471	8.05075e-12	FALSE	FALSE	Downregulated
chr4:83350091-83352674	ENOPH1	0.00362844	0.249802	0.246174	258	0.000271378	20.3361	2695.6	2517.84	-0.0988039	0.565372	FALSE	TRUE	NoDiff.
chr6:132128611-132129590	ENPP1	0.0298637	0.391387	0.36418	109	0.000271378	20.1737	2341.39	1086.01	-1.10794	3.98647e-10	TRUE	FALSE	Downregulated
chr6:46097853-46098215	ENPP4	0.0120684	0.415239	0.403171	29	0.000271378	18.8979	1051.29	1199.27	0.189951	0.0581424	FALSE	FALSE	NoDiff.
chr6:46137961-46139019	ENPP5	0.0369322	0.354328	0.319219	49	0.00272278	11.264	778.155	536.283	-0.535627	0.000557646	FALSE	FALSE	Downregulated
chr9:139947795-139949087	ENTPD2	0.138687	0.373328	0.234641	137	0.0101898	9.0105	558.089	1170.31	1.06655	1.78796e-16	TRUE	FALSE	Upregulated
chr3:40428597-40428843	ENTPD3	0.025471	0.29246	0.266989	28	0.00491337	10.2918	34.9528	66.9868	0.92984	0.0136125	TRUE	FALSE	Upregulated
chr3:69062371-69062955	EOGT	0	0.337489	0.335193	70	0.00163634	12.7069	581.334	1167.49	1.00407	6.79784e-16	TRUE	FALSE	Upregulated
chr22:41487232-41489338	EP300	0.00536433	0.34999	0.335679	207	0.000271378	18.3241	6317.43	4473.39	-0.497986	1.86536e-10	FALSE	TRUE	Downregulated
chr22:41592974-41594127	EP300-AS1	0.0040395	0.246407	0.249558	99	0.00797866	9.59788	59.7466	189.897	1.66206	5.70137e-08	FALSE	TRUE	Upregulated
chr12:132568405-132569714	EP400NL	0.0264491	0.296785	0.271041	131	0.00272278	11.0452	604.541	552.278	-0.13174	0.502861	FALSE	FALSE	NoDiff.
chr2:46523827-46525520	EPAS1	0.0442852	0.325501	0.281216	173	0.000271378	21.8528	648.029	1865.78	1.52528	0.00145919	TRUE	FALSE	Upregulated
chr1:29240739-29241961	EPB41	0.00778162	0.295638	0.286089	124	0.000500314	14.4064	3128.47	4481.46	0.518148	3.44846e-07	FALSE	FALSE	Upregulated
chr20:34679665-34680696	EPB41L1	0.017487	0.288843	0.271356	96	0.00177479	12.6206	4056.28	3756.58	-0.110961	0.267885	TRUE	FALSE	NoDiff.
chr20:34741474-34742965	EPB41L1	0.102284	0.37139	0.269106	82	0.00293094	10.941	4056.28	3756.58	-0.110961	0.267885	TRUE	TRUE	NoDiff.
chr6:131383451-131384459	EPB41L2	0.0172896	0.388129	0.378202	110	0.000271378	17.1577	2552.58	1079.7	-1.24183	3.33744e-10	TRUE	TRUE	Downregulated
chr5:111754697-111756221	EPB41L4A	0.00732382	0.306483	0.299159	172	0.000271378	21.9478	644.893	646.213	0.00482659	0.976398	FALSE	FALSE	NoDiff.
chr9:112082196-112083358	EPB41L4B	0.015496	0.31958	0.298684	173	0.000668406	13.9112	1674.57	1445.09	-0.212602	0.0340802	FALSE	FALSE	Downregulated
chr2:149401596-149402738	EPC2	0.00568094	0.52767	0.508052	122	0.000271378	18.8283	1768.77	471.164	-1.90784	1.01797e-63	FALSE	TRUE	Downregulated
chr7:37960770-37960989	EPDR1	0.507353	0.788173	0.280819	17	0.0905899	6.272	90.159	194.897	1.10826	8.46855e-06	TRUE	FALSE	Upregulated
chr1:38231409-38231926	EPHA10	0.00872607	0.258813	0.250087	25	0.0084827	9.35996	666.271	456.391	-0.546554	2.37033e-05	TRUE	FALSE	Downregulated
chr1:16480970-16482450	EPHA2	0.00876907	0.315103	0.306334	108	0.00621285	9.99966	820.21	1111.84	0.438709	0.000355685	FALSE	FALSE	Upregulated
chr2:222437383-222438495	EPHA4	0.0029703	0.313684	0.316166	85	0.000500314	14.4975	5579.2	2187.51	-1.35061	3.6296e-21	FALSE	TRUE	Downregulated
chr3:96532094-96534326	EPHA6	0.0237954	0.362032	0.33859	203	0.000271378	21.1688	358.708	112.315	-1.67222	1.90303e-14	FALSE	TRUE	Downregulated
chr1:23036689-23037986	EPHB2	0.0203574	0.338458	0.307192	163	0.00272278	11.2006	342.594	272.742	-0.331518	0.164812	TRUE	FALSE	NoDiff.
chr3:184279693-184280459	EPHB3	0.0135806	0.250482	0.238818	91	0.00191034	12.4089	562.482	1424.66	1.33894	1.25982e-15	FALSE	FALSE	Upregulated
chr7:100422376-100425625	EPHB4	0.100263	0.431231	0.331045	188	0.000271378	23.2352	7632.36	3341.48	-1.19159	2.0722e-45	FALSE	TRUE	Downregulated
chr1:92495302-92495828	EPHX4	0.0206679	0.503933	0.45202	62	0.00718618	9.69516	76.5098	5.68072	-3.7514	2.6381e-13	FALSE	FALSE	Downregulated
chr6:146056695-146057241	EPM2A	0.00525593	0.214955	0.209699	33	0.00828857	9.4214	355.516	298.671	-0.250148	0.0897913	FALSE	FALSE	NoDiff.
chr17:19140858-19141866	EPN2	0.014888	0.313078	0.29819	62	0.00218775	12.3262	2504.78	4287.42	0.775252	3.91092e-20	TRUE	TRUE	Upregulated
chr17:48609686-48611955	EPN3	0.0155637	0.329473	0.31391	62	0.000271378	17.621	2094.81	3626.26	0.791266	5.23083e-10	FALSE	FALSE	Upregulated
chr19:11494309-11495295	EPOR	0.160413	0.623952	0.463539	44	0.0114994	8.88465	600.828	329.685	-0.864642	9.49256e-11	TRUE	TRUE	Downregulated
chr8:144951432-144953340	EPPK1	0.0780342	0.355843	0.278069	131	0.000271378	15.3916	5739.28	12672.4	1.14253	1.34182e-25	TRUE	TRUE	Upregulated
chr1:51983979-51984938	EPS15	0.00144509	0.347808	0.346363	81	0.000271378	18.0158	4756.91	3236.52	-0.555319	1.89241e-09	TRUE	FALSE	Downregulated
chr12:15942595-15943091	EPS8	0.0217507	0.224497	0.202746	25	0.0340947	7.55145	2438.76	3312.31	0.44204	2.45105e-06	TRUE	FALSE	Upregulated
chr19:55587039-55587387	EPS8L1	0.0196314	0.524539	0.504908	12	0.000271378	17.19	1783.7	884.535	-1.01147	1.62854e-16	TRUE	TRUE	Downregulated
chr11:705660-708017	EPS8L2	0.0881836	0.472928	0.424548	151	0.000959715	12.961	5286.92	2551.45	-1.05127	6.86077e-28	FALSE	TRUE	Downregulated
chr5:96143017-96143779	ERAP1	0.00221239	0.395612	0.3934	82	0.000271378	17.7705	923.537	407.258	-1.18063	4.36376e-10	TRUE	FALSE	Downregulated
chr17:37844412-37845362	ERBB2	0.0702404	0.313274	0.243034	21	0.0406067	7.32838	5336.91	4975.02	-0.101124	0.379013	TRUE	FALSE	NoDiff.
chr17:37856024-37857817	ERBB2	0.0243384	0.439137	0.417073	88	0.000791136	13.5761	5336.91	4975.02	-0.101124	0.379013	TRUE	FALSE	NoDiff.
chr5:65221548-65222764	ERBB2IP	0.00247443	0.534723	0.532717	126	0.000271378	28.6359	6786.24	2161.65	-1.65021	9.17704e-60	FALSE	TRUE	Downregulated
chr12:56472859-56475912	ERBB3	0.0266994	0.289959	0.263259	132	0.000271378	16.8227	15295.8	14955.7	-0.0323561	0.836412	TRUE	TRUE	NoDiff.
chr2:213402703-213403781	ERBB4	0.0100925	0.277634	0.267542	90	0.000271378	18.1857	1152.89	1949.41	0.758792	5.81768e-09	TRUE	FALSE	Upregulated
chr12:1100553-1101125	ERC1	0.0162065	0.391503	0.375297	33	0.000668406	14.2181	2081.15	2437.49	0.227847	0.0043652	FALSE	FALSE	Upregulated
chr3:56500749-56502624	ERC2	0.00706602	0.291571	0.283144	119	0.000271378	14.8308	136.87	79.9531	-0.774034	0.00126459	FALSE	FALSE	Downregulated
chr10:50747473-50747770	ERCC6	0	0.201802	0.201802	16	0.0256239	7.89724	737.96	891.763	0.274393	0.0463492	FALSE	FALSE	Upregulated
chr5:60241166-60241944	ERCC8	0.00272347	0.255934	0.25321	47	0.000668406	13.8576	784.946	566.111	-0.472617	0.00238532	FALSE	FALSE	Downregulated
chr19:42756703-42759672	ERF	0.0393074	0.59901	0.551012	231	0.000271378	26.7262	4214.03	878.569	-2.26264	3.87856e-121	TRUE	TRUE	Downregulated
chr21:40032834-40033275	ERG	0.364263	0.62067	0.256407	34	0.0639662	6.73856	82.9437	24.0373	-1.7757	3.37591e-08	FALSE	TRUE	Downregulated
chr5:172260894-172262316	ERGIC1	0.0169998	0.397572	0.380572	80	0.000271378	20.2633	10667	5349.61	-0.995534	2.50634e-13	TRUE	TRUE	Downregulated
chr16:20817910-20818299	ERI2	0.00094162	0.237997	0.237055	34	0.000271378	19.6832	2318.97	1847.99	-0.326897	0.0234624	FALSE	FALSE	Downregulated
chr8:681419-681795	ERICH1	0.00403226	0.273363	0.269331	27	0.00320424	10.8172	1173.1	1239.01	0.0778162	0.564256	FALSE	FALSE	NoDiff.
chr2:171626995-171628123	ERICH2	0.00866618	0.319457	0.309615	97	0.000271378	18.2099	194.577	106.022	-0.877638	4.94124e-06	FALSE	FALSE	Downregulated
chr3:150421133-150421953	ERICH6	0.019677	0.573866	0.554189	57	0.000271378	17.6955	59.8978	13.4188	-2.15989	1.40181e-05	FALSE	TRUE	Downregulated
chr3:150421133-150421953	ERICH6-AS1	0.019677	0.573866	0.554189	57	0.000271378	17.6955	146.791	50.9931	-1.52471	8.19273e-08	FALSE	TRUE	Downregulated
chr2:54014095-54014988	ERLEC1	0.00525585	0.387939	0.382683	61	0.000271378	20.1354	3026.97	1429.75	-1.08182	1.23613e-09	FALSE	TRUE	Downregulated
chr10:101945172-101946012	ERLIN1	0	0.209828	0.209828	61	0.00696486	9.7593	2673.25	2462.93	-0.118765	0.287059	FALSE	FALSE	NoDiff.
chr1:43282014-43283044	ERMAP	0.0731529	0.279887	0.212676	59	0.00238362	11.764	845.611	497.086	-0.765283	4.14467e-12	FALSE	FALSE	Downregulated
chr17:62206870-62207459	ERN1	0.00412193	0.271121	0.266999	80	0.000271378	16.006	1273.69	1650.58	0.374175	0.000707605	FALSE	FALSE	Upregulated
chr12:15081800-15082299	ERP27	0.00403226	0.292961	0.288929	5	0.0151893	8.5777	74.7131	144.955	0.955195	9.77061e-06	FALSE	FALSE	Upregulated
chr12:112450089-112450840	ERP29	0.0181783	0.220812	0.202634	34	0.00384605	10.6195	12699	9326.03	-0.445269	4.34264e-05	TRUE	FALSE	Downregulated
chr4:53617520-53617893	ERVMER34-1	0.0234899	0.387398	0.363908	30	0.00669853	9.80806	139.986	93.7499	-0.581192	0.0143212	TRUE	FALSE	Downregulated
chr11:124632081-124632844	ESAM	0.00733666	0.463225	0.45411	85	0.000271378	15.1049	55.4005	114.337	1.03797	0.0102993	FALSE	TRUE	Upregulated
chr6:152124946-152125269	ESR1	0.112116	0.373831	0.261715	8	0.0682848	6.65905	28875.6	13338.3	-1.11425	1.3941e-38	FALSE	FALSE	Downregulated
chr6:152128515-152130337	ESR1	0.00907878	0.303862	0.295144	140	0.000271378	17.8852	28875.6	13338.3	-1.11425	1.3941e-38	FALSE	TRUE	Downregulated
chr14:64804682-64805882	ESR2	0.00371374	0.288409	0.284696	91	0.000271378	19.1554	168.983	117.684	-0.523444	0.0136407	FALSE	FALSE	Downregulated
chr14:64761519-64761822	ESR2	0.080248	0.371633	0.291385	15	0.0151454	8.58677	168.983	117.684	-0.523444	0.0136407	FALSE	FALSE	Downregulated
chr8:95651433-95654114	ESRP1	0.0047516	0.545587	0.540836	155	0.000271378	42.2373	13718.5	4806.86	-1.51286	1.54144e-33	FALSE	TRUE	Downregulated
chr11:64073057-64074198	ESRRA	0.0977155	0.40626	0.308545	99	0.000271378	15.9258	2215.46	2336.39	0.0764138	0.546737	FALSE	TRUE	NoDiff.
chr12:56522077-56523667	ESYT1	0.0452948	0.326983	0.281688	76	0.000271378	14.9951	12137.4	9976.89	-0.282916	0.00909195	TRUE	FALSE	Downregulated
chr3:138153270-138153920	ESYT3	0.136523	0.350041	0.213519	66	0.00248077	11.4824	170.631	380.093	1.1531	6.42422e-08	FALSE	FALSE	Upregulated
chr5:137879959-137880521	ETF1	0.0954318	0.305577	0.210146	11	0.0563422	6.90043	11024.3	10579.6	-0.0595123	0.518827	FALSE	FALSE	NoDiff.
chr15:76605170-76606643	ETFA	0.222293	0.433454	0.211161	22	0.0323771	7.61693	9307.84	14409.3	0.630581	2.07737e-15	FALSE	FALSE	Upregulated
chr19:51868711-51871652	ETFB	0.0249256	0.234659	0.209733	168	0.000271378	20.0113	3471.82	3049.02	-0.187705	0.194605	TRUE	TRUE	NoDiff.
chr4:159592101-159592753	ETFDH	0.00282486	0.292273	0.289448	31	0.00238362	11.6902	771.377	2132.02	1.46796	3.83388e-24	FALSE	FALSE	Upregulated
chr21:40176901-40178222	ETS2	0.00781264	0.593942	0.586129	115	0.000271378	34.2523	1044.33	278.103	-1.90909	1.02212e-63	TRUE	TRUE	Downregulated
chr1:157107971-157108706	ETV3	0.0356603	0.454038	0.423026	81	0.000271378	18.1005	1770.31	774.884	-1.19133	8.64758e-26	FALSE	FALSE	Downregulated
chr17:41621539-41624089	ETV4	0.0267879	0.267811	0.241817	147	0.000668406	13.7748	28.9738	114.12	1.97586	4.64248e-12	TRUE	TRUE	Upregulated
chr3:185825691-185827686	ETV5	0.0111195	0.404156	0.393036	148	0.000271378	17.9516	18.7683	80.3335	2.0839	7.26063e-06	TRUE	TRUE	Upregulated
chr12:11801726-11803411	ETV6	0.0030894	0.405027	0.400262	150	0.000271378	22.3289	643.872	434.928	-0.564692	3.84931e-05	FALSE	TRUE	Downregulated
chr1:36788834-36789588	EVA1B	0.0395239	0.5249	0.482136	78	0.00800283	9.55174	324.837	910.675	1.4847	2.11899e-11	TRUE	FALSE	Upregulated
chr17:74023094-74023731	EVPL	0.0446009	0.501574	0.458365	29	0.00272278	11.0995	4404.5	4243.41	-0.0539701	0.683675	FALSE	TRUE	NoDiff.
chr17:18280906-18281481	EVPLL	0.270068	0.674259	0.404191	13	0.0594709	6.83951	90.8938	102.145	0.163987	0.564185	TRUE	FALSE	NoDiff.
chr1:40974291-40974785	EXO5	0.00159236	0.240032	0.23844	52	0.00272278	11.1176	524.859	342.014	-0.620132	0.000151648	TRUE	FALSE	Downregulated
chr5:443435-444014	EXOC3	0	0.315324	0.315324	31	0.000791136	13.313	2815.85	2384.36	-0.240215	0.00264535	FALSE	FALSE	Downregulated
chr5:443435-444014	EXOC3-AS1	0	0.315324	0.315324	31	0.000791136	13.313	402.327	293.572	-0.455437	0.00396005	FALSE	FALSE	Downregulated
chr14:57735107-57735520	EXOC5	0.0111331	0.345854	0.334721	38	0.000271378	21.4052	4643.34	4063.24	-0.192587	0.0703765	FALSE	TRUE	NoDiff.
chr17:74099198-74099659	EXOC7	0.00489009	0.268837	0.263947	16	0.00177479	12.5256	8694.3	12011.8	0.466179	2.05975e-07	TRUE	FALSE	Upregulated
chr1:231475211-231475345	EXOC8	0.0102248	0.230365	0.22014	11	0.060471	6.8146	1581.1	2778.24	0.813285	1.38522e-24	FALSE	FALSE	Upregulated
chr3:38537770-38538589	EXOG	0.0239868	0.309415	0.285429	47	0.000959715	13.0711	602.859	431.249	-0.483709	0.000150721	TRUE	FALSE	Downregulated
chr16:70285846-70286077	EXOSC6	0.00584795	0.2062	0.200352	14	0.0297199	7.72897	2466.34	2187.57	-0.173684	0.179585	FALSE	FALSE	NoDiff.
chr3:45016668-45017365	EXOSC7	0.00814902	0.417465	0.409316	35	0.000791136	13.3799	961.007	873.616	-0.136949	0.21655	FALSE	FALSE	NoDiff.
chr11:108463296-108464736	EXPH5	0.0115756	0.241294	0.228559	82	0.000271378	14.8346	310.549	193.238	-0.681714	0.0010196	TRUE	FALSE	Downregulated
chr8:119122904-119124609	EXT1	0.0298502	0.287411	0.257561	153	0.000271378	20.9421	1282.88	1512.19	0.23675	0.0542159	FALSE	FALSE	NoDiff.
chr11:44117561-44118178	EXT2	0.0136154	0.299076	0.300206	39	0.00499677	10.2789	1903.65	2695.35	0.501067	8.23375e-06	FALSE	FALSE	Upregulated
chr8:28559246-28560078	EXTL3-AS1	0.00730196	0.29767	0.290368	67	0.000668406	14.1667	57.1334	65.9447	0.21702	0.590572	FALSE	FALSE	NoDiff.
chr20:45523098-45523625	EYA2	0.00678299	0.402843	0.39606	65	0.000271378	15.3484	514.36	236.68	-1.12143	1.1759e-15	FALSE	TRUE	Downregulated
chr6:133562126-133562790	EYA4	0.12008	0.558554	0.475603	71	0.000668406	14.3098	44.6769	54.4796	0.289079	0.473508	FALSE	TRUE	NoDiff.
chr17:40896111-40896990	EZH1	0.0295303	0.378969	0.349439	45	0.000500314	14.5979	2557.46	2034.2	-0.329715	0.00139674	FALSE	TRUE	Downregulated
chr6:159238111-159240554	EZR	0.0151652	0.325366	0.317005	180	0.000271378	17.756	8138.54	4459.36	-0.868062	1.75144e-17	FALSE	TRUE	Downregulated
chr13:113759443-113760429	F7	0.0517369	0.430538	0.378801	20	0.00220229	12.153	75.5983	200.186	1.41087	3.54477e-05	TRUE	FALSE	Upregulated
chr16:74807869-74809209	FA2H	0.120547	0.433062	0.322884	107	0.000959715	12.9755	448.82	534.974	0.252354	0.154441	TRUE	FALSE	NoDiff.
chr1:46859805-46860559	FAAH	0.0327475	0.300681	0.265881	73	0.00238362	11.6467	1433.48	775.71	-0.885015	2.17691e-16	FALSE	FALSE	Downregulated
chr17:79520379-79520897	FAAP100	0.0581303	0.405553	0.347423	18	0.00678448	9.78432	1659.02	1706.84	0.0405417	0.800366	FALSE	FALSE	NoDiff.
chr1:2125906-2126677	FAAP20	0.00511364	0.400361	0.449762	82	0.00280792	11.0256	762.892	714.43	-0.0955763	0.466633	FALSE	TRUE	NoDiff.
chr1:2139619-2140088	FAAP20	0.0670094	0.556777	0.489767	12	0.0181045	8.34943	762.892	714.43	-0.0955763	0.466633	FALSE	FALSE	NoDiff.
chr1:31846127-31846638	FABP3	0.234246	0.642077	0.407831	23	0.00635215	9.87646	47.2547	75.5216	0.683323	0.0196857	FALSE	FALSE	Upregulated
chr11:70049260-70050263	FADD	0.00386582	0.210307	0.206441	95	0.000271378	18.9596	2712.79	1950.64	-0.476264	0.000473142	FALSE	FALSE	Downregulated
chr11:61583258-61584200	FADS2	0.0667912	0.495416	0.428625	68	0.00401987	10.5408	982.136	438.741	-1.16217	3.2855e-14	TRUE	TRUE	Downregulated
chr11:61658216-61659669	FADS3	0.0299018	0.351439	0.323319	139	0.000271378	17.5852	1934.55	1444.79	-0.420209	1.20418e-05	FALSE	TRUE	Downregulated
chr15:80444540-80445575	FAH	0.0285837	0.345336	0.32928	66	0.0082215	9.46211	767.109	883.469	0.202707	0.224993	FALSE	TRUE	NoDiff.
chr3:138327298-138327912	FAIM	0.0714286	0.34756	0.276132	54	0.00904836	9.19782	860.216	665.913	-0.368708	0.0047096	FALSE	FALSE	Downregulated
chr1:150488343-150489137	FALEC	0.107974	0.394901	0.286927	36	0.000668406	14.3069	62.7526	70.0257	0.161907	0.633335	FALSE	FALSE	NoDiff.
chr9:130741664-130743075	FAM102A	0.00492655	0.321132	0.317712	97	0.000271378	15.1032	13321	7873.05	-0.758582	7.29266e-21	TRUE	FALSE	Downregulated
chr15:83655119-83655452	FAM103A1	0.00571524	0.295121	0.289405	20	0.0130323	8.74501	1641.35	1766.78	0.106045	0.367796	FALSE	FALSE	NoDiff.
chr17:71227395-71229559	FAM104A	0.0147007	0.214885	0.200185	137	0.000668406	13.8021	3080.7	3666.83	0.251225	0.00272023	FALSE	FALSE	Upregulated
chrX:55187962-55188304	FAM104B	0.101077	0.336642	0.235565	18	0.0286858	7.76493	1096.47	823.907	-0.412015	0.00151612	FALSE	FALSE	Downregulated
chr5:14580983-14582380	FAM105A	0.0601798	0.277311	0.216843	105	0.000271378	15.1694	419.762	955.637	1.18453	1.31389e-13	TRUE	FALSE	Upregulated
chr10:14646550-14647373	FAM107B	0.0142896	0.303075	0.288786	33	0.000271378	19.8558	1891.33	1420.39	-0.412681	0.036548	FALSE	FALSE	Downregulated
chr12:111806202-111806840	FAM109A	0.0478869	0.337348	0.289461	48	0.00571959	10.1758	428.684	514.921	0.262789	0.0828569	TRUE	FALSE	NoDiff.
chr20:821868-822396	FAM110A	0.028426	0.336477	0.304802	47	0.0964623	6.19398	1046.71	1112.64	0.0884224	0.538579	TRUE	FALSE	NoDiff.
chr8:58907270-58907964	FAM110B	0.0122376	0.386719	0.37646	67	0.00220229	12.0926	265.494	124.909	-1.0909	3.27457e-08	FALSE	FALSE	Downregulated
chr2:45581-47236	FAM110C	0.00820521	0.241781	0.233575	187	0.000271378	17.0681	1217.1	1479.26	0.281224	0.0276373	TRUE	TRUE	Upregulated
chr11:58912138-58913268	FAM111A	0.0531491	0.505753	0.452604	40	0.000668406	14.1163	3893.44	3877.1	-0.00573447	0.970579	FALSE	TRUE	NoDiff.
chr4:38869165-38870142	FAM114A1	0.0968437	0.352826	0.255796	85	0.00725794	9.66892	668.313	1084.06	0.699304	2.28633e-09	TRUE	FALSE	Upregulated
chr17:47840796-47841437	FAM117A	0.341247	0.629669	0.288422	54	0.0171429	8.40405	438.507	830.768	0.921647	1.0321e-17	TRUE	TRUE	Upregulated
chr6:170598683-170600305	FAM120B	0.0457739	0.418707	0.372933	166	0.000271378	30.0417	3767.63	4892.08	0.376875	1.21986e-05	FALSE	TRUE	Upregulated
chr6:170602017-170602486	FAM120B	0.0182686	0.282364	0.264095	5	0.0318823	7.64876	3767.63	4892.08	0.376875	1.21986e-05	FALSE	FALSE	Upregulated
chrX:54208737-54210163	FAM120C	0.0111685	0.254413	0.239757	109	0.00111136	12.8737	3356.45	1521.49	-1.14156	1.42266e-54	FALSE	FALSE	Downregulated
chrX:133930015-133931123	FAM122B	0.0259622	0.626809	0.600846	41	0.000271378	16.3616	8025.38	2930.06	-1.45364	2.95786e-45	FALSE	TRUE	Downregulated
chrX:133930015-133931123	FAM122C	0.0259622	0.626809	0.600846	41	0.000271378	16.3616	325.916	77.3444	-2.0753	1.19763e-16	TRUE	TRUE	Downregulated
chrX:133941055-133941816	FAM122C	0.0433602	0.360885	0.317525	33	0.00272278	11.0753	325.916	77.3444	-2.0753	1.19763e-16	TRUE	TRUE	Downregulated
chr7:23052906-23053675	FAM126A	0.093087	0.312355	0.219268	78	0.037417	7.43739	474.118	727.963	0.618765	8.10578e-07	FALSE	FALSE	Upregulated
chr2:201935598-201936219	FAM126B	0.0555327	0.374886	0.319353	24	0.00177479	12.5199	2082.73	3248.03	0.641361	1.99985e-10	TRUE	FALSE	Upregulated
chrX:134155669-134156492	FAM127C	0.00273161	0.364569	0.361838	62	0.000668406	14.2279	2765.83	1388.83	-0.994138	1.27412e-20	TRUE	FALSE	Downregulated
chr9:130329086-130332097	FAM129B	0.0256627	0.311822	0.289182	181	0.000271378	17.4809	7130.92	7674.83	0.105851	0.445905	TRUE	TRUE	NoDiff.
chr9:130341161-130341663	FAM129B	0.293691	0.54961	0.255919	11	0.0997616	6.14654	7130.92	7674.83	0.105851	0.445905	TRUE	TRUE	NoDiff.
chr1:16399560-16400481	FAM131C	0.0346442	0.292307	0.24339	98	0.019526	8.25941	45.1708	135.199	1.57247	5.79407e-08	FALSE	FALSE	Upregulated
chr2:239067513-239068089	FAM132B	0.0475979	0.33613	0.344784	88	0.00111136	12.8354	125.021	49.3082	-1.34869	0.000563476	FALSE	FALSE	Downregulated
chr2:220040704-220043885	FAM134A	0.0202334	0.29435	0.269461	225	0.000271378	22.5689	5177.59	2513.24	-1.04243	2.04413e-28	FALSE	FALSE	Downregulated
chr5:16615924-16617498	FAM134B	0.0175892	0.26666	0.249071	122	0.000271378	17.2919	511.277	366.569	-0.480621	0.00212009	FALSE	FALSE	Downregulated
chr17:40761754-40762759	FAM134C	0.0201499	0.384198	0.364048	46	0.00238362	11.7758	2347.07	2124.02	-0.143609	0.177597	FALSE	TRUE	NoDiff.
chr6:71122804-71123497	FAM135A	0.206958	0.443311	0.236354	58	0.0585592	6.85736	50.474	32.587	-0.629159	0.18553	FALSE	FALSE	NoDiff.
chr4:89744363-89744988	FAM13A	0.00641026	0.500408	0.493997	11	0.000791136	13.4604	88.142	127.069	0.529982	0.019972	FALSE	TRUE	Upregulated
chr5:137367870-137368771	FAM13B	0.00290833	0.274426	0.271518	76	0.00191034	12.4115	3743.34	4128.68	0.141497	0.3612	FALSE	TRUE	NoDiff.
chr10:74927888-74928426	FAM149B1	0.00271739	0.387138	0.38442	31	0.00621285	10.0006	1562.17	1134.32	-0.461052	9.93603e-06	FALSE	TRUE	Downregulated
chrX:68723312-68724047	FAM155B	0.04207	0.439447	0.403752	41	0.000791136	13.5489	605.361	497.776	-0.284279	0.116132	TRUE	FALSE	NoDiff.
chr4:152329825-152331298	FAM160A1	0.0222748	0.349969	0.338279	110	0.000271378	16.0531	619.271	311.986	-0.98797	1.40476e-09	FALSE	TRUE	Downregulated
chr10:116581595-116582111	FAM160B1	0	0.393189	0.393189	68	0.000271378	16.2212	2450.5	1389.93	-0.817771	2.13359e-09	FALSE	FALSE	Downregulated
chr8:21946618-21947677	FAM160B2	0.00774676	0.606891	0.599538	101	0.000271378	20.2585	2960.97	1069.82	-1.4683	1.89341e-45	FALSE	TRUE	Downregulated
chr2:62081812-62082602	FAM161A	0.0100093	0.21561	0.205601	29	0.000668406	13.7175	573.805	1230.97	1.09914	1.12129e-14	TRUE	FALSE	Upregulated
chr3:122101572-122101898	FAM162A	0.00641026	0.250255	0.243844	9	0.0165459	8.44786	2118.77	2227.17	0.0720608	0.612648	FALSE	FALSE	NoDiff.
chr8:11323091-11324182	FAM167A	0.072449	0.292892	0.220443	61	0.00635215	9.85107	75.4288	606.296	3.01137	1.16498e-35	TRUE	FALSE	Upregulated
chr11:73308661-73309387	FAM168A	0.0104493	0.527269	0.51682	76	0.000271378	19.6733	9376.95	2995.53	-1.6462	1.40839e-63	TRUE	TRUE	Downregulated
chr5:74161729-74162533	FAM169A	0.00603819	0.283161	0.276869	118	0.000668406	14.1185	325.94	401.474	0.298894	0.13734	TRUE	FALSE	NoDiff.
chr10:15413034-15413426	FAM171A1	0.00203252	0.235734	0.232893	76	0.0909179	6.2673	34.8124	130.08	1.89737	4.91578e-13	FALSE	FALSE	Upregulated
chr2:187558690-187559382	FAM171B	0.00315457	0.385377	0.382223	53	0.000271378	15.008	726.988	265.57	-1.45059	3.34577e-24	FALSE	TRUE	Downregulated
chr16:770161-770915	FAM173A	0.0123832	0.302019	0.289636	41	0.00272278	11.3517	831.167	781.707	-0.0881039	0.558737	FALSE	FALSE	NoDiff.
chr5:10251214-10251767	FAM173B	0.0157795	0.230577	0.214798	13	0.00401987	10.5191	2032.48	1797.12	-0.177297	0.0750905	FALSE	FALSE	NoDiff.
chr4:84405660-84406151	FAM175A	0.00752845	0.261885	0.254357	48	0.00904836	9.1997	1223.57	1049.9	-0.219744	0.141037	FALSE	FALSE	NoDiff.
chr10:102672293-102673158	FAM178A	0.0225094	0.327346	0.304837	72	0.00635215	9.876	3728.81	1447.84	-1.3649	2.32827e-27	FALSE	FALSE	Downregulated
chr14:45429960-45431022	FAM179B	0.00395231	0.296255	0.292303	29	0.00280792	10.9849	2639.29	2572.16	-0.0367304	0.822844	FALSE	TRUE	NoDiff.
chr4:17782850-17783106	FAM184B	0.0504456	0.250963	0.200517	31	0.0447668	7.18708	215.179	215.411	0.00545522	0.986055	FALSE	FALSE	NoDiff.
chr10:15901893-15902394	FAM188A	0.00195312	0.261013	0.25906	36	0.00111136	12.8273	1491.17	1369.97	-0.121813	0.400204	FALSE	FALSE	NoDiff.
chr15:29862395-29863648	FAM189A1	0.0280188	0.279683	0.254416	199	0.000271378	16.6602	12.2044	56.6063	2.21925	1.22098e-07	TRUE	FALSE	Upregulated
chr1:155224561-155225248	FAM189B	0.0491192	0.500668	0.451549	55	0.000500314	14.6096	2128.85	647.601	-1.7172	6.90735e-20	TRUE	TRUE	Downregulated
chr16:57220795-57221629	FAM192A	0.00413223	0.297504	0.293371	27	0.000271378	17.3715	2934.43	2218.66	-0.403402	1.19922e-07	FALSE	FALSE	Downregulated
chrX:103411214-103412922	FAM199X	0.0219216	0.440778	0.422128	70	0.000271378	15.3406	5891.98	4470.16	-0.398466	0.000221693	TRUE	FALSE	Downregulated
chr10:5726661-5727597	FAM208B	0.00504226	0.239865	0.234823	95	0.000271378	18.7982	12588.7	8201.3	-0.618199	2.49378e-10	FALSE	TRUE	Downregulated
chr7:191704-192970	FAM20C	0.0680318	0.569283	0.501047	158	0.000271378	23.0206	440.174	484.833	0.136918	0.512354	TRUE	FALSE	NoDiff.
chr3:49840834-49841167	FAM212A	0.00284091	0.208443	0.205602	31	0.0214407	8.12359	3.99535	73.5037	4.22722	4.17177e-12	FALSE	FALSE	Upregulated
chr1:112281122-112282489	FAM212B	0.00344835	0.472297	0.468849	109	0.000271378	20.6485	1331.37	212.716	-2.64684	2.95744e-39	TRUE	TRUE	Downregulated
chr1:112297672-112299263	FAM212B	0.0108847	0.299577	0.288693	114	0.000271378	17.8785	1331.37	212.716	-2.64684	2.95744e-39	TRUE	TRUE	Downregulated
chr1:2516911-2517342	FAM213B	0.045039	0.276268	0.230675	15	0.0740898	6.53615	1307.57	3128.53	1.25772	1.02919e-13	FALSE	FALSE	Upregulated
chr15:52970020-52972461	FAM214A	0.0194584	0.539371	0.519913	142	0.000271378	31.6442	4004.82	1419.53	-1.49598	1.31033e-14	TRUE	TRUE	Downregulated
chr9:35114699-35116445	FAM214B	0.0924886	0.315591	0.223102	66	0.0082215	9.43443	602.244	2258	1.9067	4.05196e-59	TRUE	FALSE	Upregulated
chr20:58508660-58509242	FAM217B	0.0199041	0.359439	0.339535	68	0.000668406	14.0501	3530.85	2321.23	-0.605188	5.09544e-16	FALSE	TRUE	Downregulated
chr12:110151416-110152757	FAM222A	0.0075734	0.33218	0.327763	181	0.000271378	16.5765	353.382	171.168	-1.0474	8.50454e-05	FALSE	FALSE	Downregulated
chr17:27139186-27140040	FAM222B	0.00995459	0.407029	0.395361	53	0.00238362	11.6716	1235.69	982.647	-0.331642	0.00184618	FALSE	TRUE	Downregulated
chr17:27169314-27169893	FAM222B	0.0014245	0.372786	0.371362	40	0.000271378	16.9647	1235.69	982.647	-0.331642	0.00184618	FALSE	TRUE	Downregulated
chr2:24345949-24346907	FAM228B	0.00440126	0.26829	0.263889	112	0.000271378	18.4772	152.519	163.264	0.0997772	0.668774	FALSE	FALSE	NoDiff.
chr10:124639360-124639909	FAM24B	0.0220483	0.229938	0.208055	57	0.0207338	8.16439	170.176	130.643	-0.382286	0.0845079	FALSE	FALSE	NoDiff.
chr10:88852699-88853287	FAM35A	0.0167862	0.234578	0.217792	7	0.0231647	8.01313	1799.68	1751.91	-0.038384	0.756417	FALSE	FALSE	NoDiff.
chr7:121035755-121036382	FAM3C	0.00322818	0.439602	0.436374	73	0.000271378	17.0403	2221.13	943.636	-1.23509	4.56986e-26	TRUE	TRUE	Downregulated
chr3:194406190-194407539	FAM43A	0.023009	0.270146	0.247137	102	0.000271378	22.6025	339.706	260.91	-0.382486	0.0248843	TRUE	FALSE	Downregulated
chr10:120861002-120861636	FAM45A	0.104269	0.405887	0.301619	11	0.085122	6.34994	293.116	223.894	-0.387194	0.00955159	FALSE	FALSE	Downregulated
chr10:120861002-120861636	FAM45B	0.104269	0.405887	0.301619	11	0.085122	6.34994	282.819	220.315	-0.359437	0.308531	TRUE	FALSE	NoDiff.
chr6:82460335-82462314	FAM46A	0.0213762	0.270031	0.248654	130	0.000668406	14.2256	3468.62	2791.97	-0.312907	0.0463558	FALSE	FALSE	Downregulated
chr4:77133659-77135766	FAM47E	0.0683445	0.324174	0.25583	121	0.000271378	17.9945	97.8421	177.281	0.857284	2.80365e-06	TRUE	FALSE	Upregulated
chr2:16846664-16847339	FAM49A	0.036438	0.325073	0.296742	74	0.00248077	11.4861	116.832	419.684	1.84428	3.07798e-21	FALSE	FALSE	Upregulated
chr8:130951244-130952041	FAM49B	0.00899787	0.417947	0.408949	72	0.000271378	16.9428	3433.32	2714.4	-0.339326	0.00734233	FALSE	FALSE	Downregulated
chr8:131027124-131029200	FAM49B	0.105654	0.33753	0.231876	176	0.000271378	22.7877	3433.32	2714.4	-0.339326	0.00734233	FALSE	FALSE	Downregulated
chrX:153671375-153672453	FAM50A	0.348688	0.570254	0.221566	42	0.0390846	7.36598	4908.16	5304.76	0.111805	0.350987	FALSE	TRUE	NoDiff.
chr5:137672613-137674808	FAM53C	0.161324	0.517364	0.354417	93	0.000271378	17.4596	3958.11	2566.51	-0.625131	2.68652e-06	FALSE	TRUE	Downregulated
chr17:635273-635886	FAM57A	0.00650602	0.437638	0.42732	95	0.000791136	13.2433	879.227	651.06	-0.434642	0.0166599	TRUE	FALSE	Downregulated
chr16:30042407-30043834	FAM57B	0.401924	0.656632	0.254708	35	0.0349688	7.52411	108.866	79.9946	-0.444145	0.175526	TRUE	TRUE	NoDiff.
chrX:152863860-152864580	FAM58A	0.0231292	0.258272	0.235143	75	0.00238362	11.5559	863.075	827.236	-0.0619702	0.730334	FALSE	FALSE	NoDiff.
chr1:150978180-150979364	FAM63A	0.121775	0.530154	0.408379	21	0.000271378	15.1115	2624.82	6360.91	1.27748	8.48222e-18	TRUE	TRUE	Upregulated
chr1:150981329-150981799	FAM63A	0.0411381	0.255467	0.214329	17	0.0694213	6.62694	2624.82	6360.91	1.27748	8.48222e-18	TRUE	FALSE	Upregulated
chr17:6346634-6347377	FAM64A	0.0818941	0.434418	0.352523	24	0.000500314	14.7274	1101.73	539.644	-1.02995	4.93055e-11	TRUE	FALSE	Downregulated
chr16:67562752-67563498	FAM65A	0.00800006	0.463697	0.455697	68	0.000271378	23.559	2869.7	8198.46	1.51402	6.22815e-29	TRUE	FALSE	Upregulated
chr1:93426149-93427794	FAM69A	0.00578947	0.352009	0.355268	164	0.000271378	19.9802	284.351	254.781	-0.16119	0.459316	FALSE	FALSE	NoDiff.
chr1:120837033-120837096	FAM72B	0.69375	0.976562	0.282813	8	0.0179207	8.37512	5435.43	2183.43	-1.31558	1.99091e-34	TRUE	TRUE	Downregulated
chr1:206134971-206137908	FAM72C	0.0364326	0.418904	0.377429	204	0.000271378	18.5532	4924.36	2099.94	-1.22949	1.761e-31	TRUE	TRUE	Downregulated
chr9:131798413-131799803	FAM73B	0.064127	0.270413	0.204868	82	0.00320424	10.8473	2296.23	1571.61	-0.547352	8.3062e-06	TRUE	FALSE	Downregulated
chr9:134152700-134153726	FAM78A	0.0292046	0.391661	0.361851	124	0.000271378	17.4758	193.354	124.307	-0.638204	0.0102767	FALSE	TRUE	Downregulated
chr8:124194293-124195103	FAM83A	0.101736	0.572186	0.47045	30	0.000271378	16.6934	111.138	240.274	1.1153	2.96633e-07	TRUE	TRUE	Upregulated
chr6:54711154-54712248	FAM83B	0.00530316	0.420591	0.415287	79	0.000271378	22.2899	9877.92	4810.79	-1.0379	6.14279e-23	FALSE	TRUE	Downregulated
chr8:144814967-144816517	FAM83H	0.0320024	0.270396	0.241192	166	0.000271378	16.3435	7625.91	8191.71	0.10306	0.417916	FALSE	FALSE	NoDiff.
chr8:144814967-144816517	FAM83H-AS1	0.0320024	0.270396	0.241192	166	0.000271378	16.3435	4614.05	6222.87	0.431548	1.35765e-09	FALSE	FALSE	Upregulated
chr2:14772728-14776096	FAM84A	0.0581592	0.325113	0.267559	232	0.000271378	24.1033	2284.03	1561.87	-0.548053	2.15922e-05	FALSE	FALSE	Downregulated
chr8:127567378-127570616	FAM84B	0.0673124	0.404591	0.337278	195	0.000271378	23.5026	14467	6474.84	-1.15976	1.98571e-18	TRUE	TRUE	Downregulated
chr8:12292765-12293664	FAM86B2	0.0228826	0.243418	0.220535	34	0.00702778	9.72795	278.705	284.455	0.0278155	0.904438	TRUE	TRUE	NoDiff.
chr3:75483709-75484159	FAM86DP	0.00198413	0.222456	0.220472	39	0.0908414	6.26971	377.635	334.16	-0.176942	0.452177	FALSE	FALSE	NoDiff.
chr4:3956571-3957098	FAM86EP	0	0.206875	0.206875	53	0.032101	7.63333	370.703	263.505	-0.494193	0.0107505	TRUE	FALSE	Downregulated
chr3:125633953-125634462	FAM86JP	0.00559218	0.265283	0.259691	20	0.00220229	11.8707	386.024	280.238	-0.461725	0.0142675	FALSE	FALSE	Downregulated
chr11:65339530-65340213	FAM89B	0.0203621	0.409483	0.389121	53	0.000500314	14.4934	1591.45	1319.81	-0.270913	0.0262831	FALSE	TRUE	Downregulated
chr15:64388051-64388555	FAM96A	0.001	0.248279	0.247279	48	0.00238362	11.614	2363.34	3234.34	0.452064	4.04942e-06	FALSE	FALSE	Upregulated
chr15:38746451-38746890	FAM98B	0.00423145	0.422749	0.418517	27	0.000271378	15.7192	3281.19	2086.32	-0.65298	4.18072e-14	FALSE	FALSE	Downregulated
chr15:31195201-31196114	FAN1	0.0851137	0.305638	0.220524	47	0.010418	8.96756	1755	1357.13	-0.37047	0.000286427	TRUE	FALSE	Downregulated
chr9:98078886-98080015	FANCC	0.00152439	0.302062	0.298772	91	0.000271378	15.9985	1400.59	1069.53	-0.389966	0.000202864	FALSE	FALSE	Downregulated
chr6:35420146-35420895	FANCE	0.0279508	0.24732	0.22262	68	0.00828857	9.42529	794.701	1386.61	0.802352	5.33798e-14	FALSE	FALSE	Upregulated
chr14:45603140-45603563	FANCM	0.0087268	0.214024	0.205297	24	0.0101898	9.0147	1242.97	1130.14	-0.137622	0.197784	FALSE	FALSE	NoDiff.
chr11:13690287-13691652	FAR1	0.00436436	0.256366	0.252001	67	0.000271378	19.087	5282.41	4145.52	-0.349451	0.00537602	FALSE	TRUE	Downregulated
chr12:29301525-29302325	FAR2	0.00778816	0.409975	0.402187	48	0.00238362	11.688	701.705	220.948	-1.66628	3.27448e-08	TRUE	FALSE	Downregulated
chr13:98794783-98796240	FARP1	0.013794	0.348781	0.328252	219	0.000668406	13.8355	1772.94	829.052	-1.09609	2.86177e-28	FALSE	FALSE	Downregulated
chr10:90750294-90750984	FAS	0.0227064	0.460448	0.437742	53	0.000271378	16.242	329.385	160.286	-1.03787	2.66226e-05	FALSE	TRUE	Downregulated
chr17:80053739-80056131	FASN	0.0546907	0.328975	0.274285	169	0.000271378	18.4981	44968	47115.2	0.0672762	0.768397	FALSE	FALSE	NoDiff.
chr4:187645182-187648274	FAT1	0.0156589	0.299353	0.278765	219	0.000271378	15.9509	896.672	543.547	-0.722622	0.000322386	FALSE	FALSE	Downregulated
chr4:126235663-126237231	FAT4	0.00574014	0.370533	0.364793	114	0.000271378	25.976	517.474	406.647	-0.348793	0.0941875	TRUE	TRUE	NoDiff.
chr6:99797071-99798577	FAXC	0.04028	0.330527	0.289312	120	0.000271378	24.7703	187.595	230.515	0.294392	0.131193	TRUE	FALSE	NoDiff.
chr5:127873696-127874369	FBN2	0.147879	0.479303	0.331424	63	0.00191034	12.5021	309.006	117.749	-1.39212	0.0237953	TRUE	TRUE	Downregulated
chr9:97400657-97402341	FBP1	0.100521	0.403438	0.302917	98	0.000271378	15.1486	10426.8	6390.97	-0.706162	3.92092e-13	FALSE	FALSE	Downregulated
chr16:30669663-30672171	FBRS	0.0240305	0.408304	0.384274	186	0.000271378	21.5728	5757.12	4529.25	-0.346131	3.53668e-06	FALSE	TRUE	Downregulated
chr12:133066209-133068148	FBRSL1	0.0308022	0.236939	0.205656	246	0.000271378	16.5593	3128.7	3941.69	0.332791	0.00299447	TRUE	TRUE	Upregulated
chr7:102714326-102715442	FBXL13	0.0378678	0.443157	0.40529	50	0.000271378	18.7748	50.2203	114.604	1.19187	1.22286e-06	FALSE	TRUE	Upregulated
chr12:1701797-1703917	FBXL14	0.103661	0.547303	0.441532	198	0.000271378	16.511	402.046	158.129	-1.34906	1.52911e-16	FALSE	TRUE	Downregulated
chr16:754819-757547	FBXL16	0.128429	0.378615	0.256148	230	0.00272278	11.0974	1653	1356.83	-0.284065	0.0372139	FALSE	TRUE	Downregulated
chr16:30933493-30936003	FBXL19	0.00366432	0.400069	0.394996	171	0.000271378	23.7519	3534.69	1390.41	-1.34639	1.55268e-19	TRUE	TRUE	Downregulated
chr16:30933493-30936003	FBXL19-AS1	0.00366432	0.400069	0.394996	171	0.000271378	23.7519	1137.91	1358.65	0.256294	0.0845676	TRUE	TRUE	NoDiff.
chr17:37556667-37558586	FBXL20	0.025119	0.370676	0.348026	146	0.000791136	13.1694	1313.45	690.168	-0.927411	1.6365e-09	FALSE	TRUE	Downregulated
chr13:77600105-77601699	FBXL3	0.0248967	0.25019	0.234639	136	0.00111136	12.8956	1670.81	1857.39	0.153003	0.300053	TRUE	FALSE	NoDiff.
chr6:99395303-99395724	FBXL4	0.00157729	0.268284	0.266707	51	0.000959715	13.014	864.979	577.002	-0.583198	9.9963e-06	FALSE	TRUE	Downregulated
chr8:145582515-145583302	FBXL6	0.0374914	0.525204	0.487712	32	0.000271378	15.5265	1968	2269.31	0.205037	0.221813	FALSE	TRUE	NoDiff.
chr16:67192833-67193369	FBXL8	0.038002	0.367658	0.329656	26	0.00111136	12.7419	861.587	1509.94	0.808938	1.11604e-07	TRUE	FALSE	Upregulated
chr2:48131795-48134871	FBXO11	0.0103485	0.526738	0.510369	219	0.000271378	42.6694	4092.37	1042.25	-1.97256	3.20143e-62	FALSE	TRUE	Downregulated
chr19:39465809-39466802	FBXO17	0.082196	0.431812	0.350806	85	0.000271378	16.29	476.366	165.845	-1.52324	1.12266e-23	TRUE	FALSE	Downregulated
chr7:100182012-100183087	FBXO24	0.0705379	0.469974	0.399436	24	0.000271378	16.9321	112.068	1205.88	3.42779	2.36933e-120	TRUE	TRUE	Upregulated
chr8:356513-356788	FBXO25	0.00714286	0.226058	0.218915	35	0.0566649	6.89348	902.731	1045.65	0.213241	0.183585	FALSE	FALSE	NoDiff.
chr6:146135352-146135898	FBXO30	0.00370358	0.243902	0.240198	69	0.00669853	9.78683	784.726	477.563	-0.716854	2.11243e-08	FALSE	FALSE	Downregulated
chr16:87416156-87417276	FBXO31	0.0161609	0.284939	0.268778	99	0.000271378	18.5876	2194.06	1940.75	-0.177045	0.052846	FALSE	FALSE	NoDiff.
chr16:87426160-87426676	FBXO31	0.00490141	0.223583	0.218682	67	0.00330477	10.6969	2194.06	1940.75	-0.177045	0.052846	FALSE	FALSE	NoDiff.
chr8:124553448-124554420	FBXO32	0.0559248	0.55702	0.501095	68	0.000271378	25.5591	316.154	112.656	-1.48678	9.71655e-13	TRUE	TRUE	Downregulated
chr14:55738320-55738971	FBXO34	0.00247988	0.207177	0.203252	71	0.000500314	14.7297	1958.67	2120.69	0.114737	0.246517	FALSE	FALSE	NoDiff.
chr2:230785362-230787002	FBXO36	0.0265051	0.249264	0.219924	115	0.000271378	14.9248	296.011	195.772	-0.594417	0.000301804	FALSE	TRUE	Downregulated
chr2:73495952-73497077	FBXO41	0.101958	0.313649	0.21169	132	0.00941507	9.131	2104.85	1470.44	-0.518109	5.32121e-05	FALSE	FALSE	Downregulated
chr1:16678136-16679505	FBXO42	0.0368167	0.239103	0.202286	99	0.00863662	9.29657	1249.85	820.946	-0.606261	1.93073e-07	TRUE	FALSE	Downregulated
chr3:196295513-196296502	FBXO45	0.0103066	0.216034	0.205728	102	0.00238362	11.7741	2896.14	2355.23	-0.298835	0.0121866	FALSE	FALSE	Downregulated
chr19:46233961-46234419	FBXO46	0	0.230359	0.230359	37	0.00635215	9.94725	1459.3	1575.92	0.110368	0.388333	FALSE	FALSE	NoDiff.
chr1:11724114-11724700	FBXO6	0.0238583	0.332722	0.30739	77	0.0082215	9.46316	189.091	221.936	0.231372	0.166739	FALSE	FALSE	NoDiff.
chr10:103454205-103455017	FBXW4	0.000976562	0.506524	0.505547	82	0.000271378	18.985	3366.45	666.356	-2.33713	1.23906e-93	FALSE	TRUE	Downregulated
chr4:153273699-153274118	FBXW7	0.0225394	0.260952	0.238412	10	0.00272278	11.3702	1013.79	3448.15	1.76537	5.17855e-60	FALSE	FALSE	Upregulated
chr4:153455699-153458068	FBXW7	0.0207963	0.429669	0.412747	183	0.000271378	20.6733	1013.79	3448.15	1.76537	5.17855e-60	FALSE	TRUE	Upregulated
chr11:72852039-72853708	FCHSD2	0.00723788	0.403827	0.396589	155	0.000271378	24.2519	2007.6	1310.36	-0.615827	8.27549e-13	FALSE	FALSE	Downregulated
chr8:11660666-11660968	FDFT1	0.00170648	0.222414	0.230774	21	0.0031528	10.8763	9307.23	10857.3	0.222291	0.0613385	TRUE	FALSE	NoDiff.
chr8:11665461-11666445	FDFT1	0.145897	0.417759	0.271862	67	0.0057678	10.1505	9307.23	10857.3	0.222291	0.0613385	TRUE	FALSE	NoDiff.
chr19:10426110-10426706	FDX1L	0.00698617	0.247916	0.235413	43	0.000791136	13.6337	1081.25	1342.52	0.311647	0.0312064	FALSE	FALSE	Upregulated
chr19:4790894-4791251	FEM1A	0.00946385	0.229415	0.219951	15	0.0533241	6.98133	1885.25	2044.95	0.117508	0.224558	FALSE	FALSE	NoDiff.
chr15:68569589-68571539	FEM1B	0.0099888	0.286087	0.276098	145	0.000271378	16.3086	3639.93	2034.42	-0.839179	1.11016e-13	FALSE	FALSE	Downregulated
chr5:114879255-114880563	FEM1C	0.0246468	0.46621	0.441564	81	0.000271378	18.5665	1196.41	472.648	-1.33888	2.66756e-20	FALSE	FALSE	Downregulated
chr5:108083837-108085536	FER	0.0274966	0.28867	0.261174	121	0.000271378	14.9734	1333.04	2214.54	0.732993	1.44127e-10	FALSE	TRUE	Upregulated
chr20:34195028-34195484	FER1L4	0.182845	0.579923	0.397078	12	0.0218726	8.08958	1799.74	7674.05	2.09175	1.38535e-87	TRUE	FALSE	Upregulated
chr20:6103261-6104125	FERMT1	0.110436	0.385591	0.276147	64	0.000791136	13.3849	178.657	540.454	1.59267	1.36164e-18	TRUE	FALSE	Upregulated
chr14:53417022-53418577	FERMT2	0.00275724	0.427727	0.424967	161	0.000271378	32.8356	3101.63	1789.74	-0.793513	6.46918e-10	FALSE	FALSE	Downregulated
chr19:35940094-35940483	FFAR2	0.0131664	0.335668	0.322502	9	0.0177862	8.38203	49.2282	77.0077	0.649009	0.0189967	FALSE	FALSE	Upregulated
chrX:54522618-54522815	FGD1	0	0.43453	0.455858	15	0.0687796	6.64691	646.3	549.305	-0.235389	0.172371	FALSE	TRUE	NoDiff.
chr9:95709622-95710010	FGD3	0.0197732	0.396739	0.376965	26	0.00330477	10.6878	801.993	1062.14	0.40622	0.0146193	TRUE	FALSE	Upregulated
chr3:14987783-14989863	FGD5-AS1	0.0156345	0.239415	0.22378	177	0.000271378	20.9053	14586.2	11224.9	-0.377872	1.23405e-05	FALSE	TRUE	Downregulated
chr3:192126928-192127963	FGF12	0.0784214	0.432557	0.354136	107	0.000668406	14.0612	380.966	371.863	-0.0361286	0.862691	TRUE	FALSE	NoDiff.
chr3:192444904-192445679	FGF12	0.0803951	0.467412	0.387017	35	0.000500314	14.3405	380.966	371.863	-0.0361286	0.862691	TRUE	TRUE	NoDiff.
chrX:137793587-137794554	FGF13	0.0182863	0.58281	0.560903	67	0.000271378	15.9256	535.315	138.108	-1.95487	1.18534e-18	FALSE	TRUE	Downregulated
chrX:138285855-138287900	FGF13	0.0328929	0.463678	0.430785	175	0.000271378	29.0701	535.315	138.108	-1.95487	1.18534e-18	FALSE	FALSE	Downregulated
chr5:170845743-170847591	FGF18	0.0295499	0.400668	0.364352	200	0.000271378	24.0735	91.4391	42.3351	-1.11709	0.000537079	FALSE	TRUE	Downregulated
chr10:93667888-93669384	FGFBP3	0.0141773	0.344041	0.329864	126	0.000271378	22.0537	567.754	251.416	-1.17532	1.31213e-17	TRUE	FALSE	Downregulated
chr8:38323956-38325508	FGFR1	0.0190576	0.556661	0.537603	105	0.000271378	25.8654	1188.4	436.588	-1.44368	1.95318e-19	TRUE	FALSE	Downregulated
chr8:38326088-38326334	FGFR1	0.00952381	0.213771	0.204247	29	0.0420003	7.27136	1188.4	436.588	-1.44368	1.95318e-19	TRUE	FALSE	Downregulated
chr4:1794830-1797313	FGFR3	0.0239257	0.410604	0.38369	325	0.000271378	26.8321	1190.56	354.368	-1.74928	1.63359e-19	FALSE	TRUE	Downregulated
chr5:176514057-176514759	FGFR4	0.0634593	0.362836	0.299377	49	0.0103178	8.98786	1180.71	2277.08	0.947824	9.37884e-08	FALSE	TRUE	Upregulated
chr4:1003944-1004703	FGFRL1	0.120632	0.373024	0.253665	61	0.0455697	7.16756	1444.39	2575.13	0.833519	4.74022e-06	TRUE	FALSE	Upregulated
chr1:59762127-59763351	FGGY	0.108641	0.481076	0.372273	87	0.000791136	13.1706	407.9	143.512	-1.50384	2.82081e-27	TRUE	TRUE	Downregulated
chrX:135229380-135230024	FHL1	0.0180412	0.514577	0.527616	94	0.00220229	11.8931	1554.64	530.019	-1.55164	2.12477e-15	TRUE	TRUE	Downregulated
chr2:106015047-106015748	FHL2	0.0335246	0.423749	0.390224	62	0.00272278	11.068	333.003	312.401	-0.0907823	0.700316	FALSE	TRUE	NoDiff.
chr1:38470908-38471526	FHL3	0.0334007	0.418865	0.384476	73	0.00800283	9.58841	100.473	41.4179	-1.28711	5.93878e-05	TRUE	TRUE	Downregulated
chr16:67282067-67283204	FHOD1	0.0801991	0.345876	0.266346	90	0.00177479	12.5947	2044.18	5424.45	1.40746	1.44418e-17	TRUE	TRUE	Upregulated
chr18:33876195-33878198	FHOD3	0.100566	0.498305	0.399341	163	0.000271378	16.2568	52.0077	23.2884	-1.16233	0.00375644	FALSE	TRUE	Downregulated
chr9:133813727-133814706	FIBCD1	0.00848944	0.446101	0.437611	129	0.000271378	24.9407	1039.69	1737.7	0.741096	4.30857e-16	TRUE	FALSE	Upregulated
chr11:65655967-65657083	FIBP	0.0555556	0.486359	0.428254	59	0.000271378	16.279	4152.91	4149.47	-0.00113414	0.990252	FALSE	TRUE	NoDiff.
chr12:108909037-108909617	FICD	0.0087795	0.279326	0.270547	39	0.0719277	6.5771	229.044	200.681	-0.191178	0.505857	FALSE	FALSE	NoDiff.
chr2:164592394-164593637	FIGN	0.00338517	0.36666	0.367376	97	0.000271378	19.8033	806.154	411.766	-0.968825	1.02275e-12	FALSE	TRUE	Downregulated
chr3:99594516-99594953	FILIP1L	0.0413571	0.262017	0.22066	14	0.0306947	7.69977	213.456	287.409	0.432286	0.244861	TRUE	FALSE	NoDiff.
chr20:42939293-42940067	FITM2	0.0164432	0.243851	0.227408	67	0.00635215	9.95637	499.095	415.555	-0.265308	0.140824	FALSE	FALSE	NoDiff.
chr19:56111850-56112302	FIZ1	0.00873245	0.389189	0.380457	42	0.00712248	9.71136	759.041	430.061	-0.820957	8.85653e-10	FALSE	FALSE	Downregulated
[truncated: 4,798 more rows]

## Sheet: S3_AlternativeTSS_ZF-D3A-wt
Gene	TSS1	TSS1_delta_PSI	TSS2	TSS2_delta_PSI
ABR	chr17:1012174-1012340	0.679	chr17:1018516-1018669	-0.677
ACOX3	chr4:8430078-8430199	0.261	chr4:8442375-8442452	-0.261
ACTR5	chr20:37377097-37377496	0.316	chr20:37376845-37377019	-0.345
ADA	chr20:43280216-43280385	0.419	chr20:43272599-43272710	-0.423
ADAMTS9	chr3:64673219-64673720	0.919	chr3:64519242-64519409	-0.896
ADGRL1	chr19:14316797-14317112	0.31	chr19:14277257-14277468	-0.31
ADGRV1	chr5:89854554-89854734	0.289	chr5:90224994-90225130	-0.288
ADSSL1	chr14:105190515-105190799	0.485	chr14:105196184-105196550	-0.487
AIM1	chr6:106808457-106808956	0.539	chr6:106988992-106989170	-0.539
AKAP11	chr13:42845994-42846364	0.248	chr13:42845522-42845900	-0.249
AKAP9	chr7:91570078-91570461	0.416	chr7:91686879-91687042	-0.416
ANK3	chr10:62493021-62493284	0.312	chr10:61900110-61900774	-0.311
ANKRD17	chr4:74123993-74125398	0.625	chr4:74088691-74088831	-0.623
AP4S1	chr14:31494676-31494993	0.205	chr14:31494312-31494504	-0.21
ARHGAP4	chrX:153189863-153190101	0.435	chrX:153193781-153193899	-0.524
ARHGEF1	chr19:42387267-42387356	0.516	chr19:42388406-42388560	-0.516
ARHGEF3	chr3:57113254-57113340	0.549	chr3:56835731-56835995	-0.544
ARID2	chr12:46122726-46123711	0.341	chr12:46124671-46124900	-0.348
ASAP2	chr2:9346894-9347359	0.371	chr2:9447296-9447547	-0.372
ATP8B2	chr1:154297997-154298178	0.363	chr1:154301154-154301551	-0.282
B3GNT2	chr2:62423227-62423490	0.718	chr2:62442737-62442750	-0.716
BAZ2A	chr12:57028729-57028829	0.63	chr12:57030513-57030560	-0.567
BCL7B	chr7:72971817-72972065	0.349	chr7:72971371-72971602	-0.435
BCORL1	chrX:129116566-129116738	0.591	chrX:129185440-129185487	-0.73
BRPF3	chr6:36164550-36164747	0.595	chr6:36165135-36165196	-0.59
BRWD1	chr21:40685369-40685712	0.474	chr21:40692952-40693611	-0.474
C11orf1	chr11:111749948-111750329	0.199	chr11:111749396-111749764	-0.2
C14orf80	chr14:105956520-105956574	0.418	chr14:105956124-105956322	-0.176
C14orf80	chr14:105956520-105956574	0.418	chr14:105957586-105957859	-0.242
C15orf59	chr15:74044451-74045077	0.661	chr15:74034818-74035064	-0.692
C19orf47	chr19:40854231-40854316	0.3	chr19:40854344-40854434	-0.298
C1orf21	chr1:184356127-184356502	0.748	chr1:184377527-184377548	-0.779
C2	chr6:31868776-31868916	0.292	chr6:31865562-31865719	-0.293
C20orf96	chr20:277564-279384	0.397	chr20:271232-271436	-0.399
C6orf132	chr6:42110038-42110715	0.694	chr6:42096794-42096921	-0.692
CAMK2N1	chr1:20811707-20812728	0.516	chr1:20810860-20811164	-0.514
CAPN1	chr11:64948686-64948881	0.144	chr11:64949931-64950012	-0.485
CAPN1	chr11:64949150-64949314	0.341	chr11:64949931-64950012	-0.485
CAPNS1	chr19:36630470-36630559	0.553	chr19:36632322-36632466	-0.556
CASP7	chr10:115439428-115439737	0.383	chr10:115438921-115439108	-0.395
CASP8	chr2:202122754-202122877	0.239	chr2:202098166-202098277	-0.239
CAST	chr5:96038440-96038619	0.405	chr5:95998688-95998870	-0.405
CASZ1	chr1:10856621-10856733	0.344	chr1:10754354-10754504	-0.414
CCDC57	chr17:80170661-80170732	0.259	chr17:80064146-80065014	-0.26
CCDC88C	chr14:91903141-91903241	0.24	chr14:91884832-91884955	-0.24
CDK16	chrX:47078076-47078504	0.287	chrX:47077465-47078063	-0.313
CDK19	chr6:111136212-111136667	0.422	chr6:111137011-111137098	-0.422
CDYL	chr6:4776607-4777041	0.417	chr6:4836021-4836542	-0.417
CENPT	chr16:67881304-67881361	0.706	chr16:67873282-67873954	-0.584
CERK	chr22:47133904-47134152	0.612	chr22:47138614-47138920	-0.637
CFLAR	chr2:201980520-201981204	0.242	chr2:201983269-201983624	-0.242
CHD3	chr17:7788092-7788401	0.633	chr17:7790916-7791161	-0.208
CHD3	chr17:7788092-7788401	0.633	chr17:7792169-7792418	-0.426
CHEK1	chr11:125495031-125495907	0.231	chr11:125496124-125496470	-0.23
CHMP7	chr8:23105433-23105710	0.508	chr8:23101150-23101357	-0.508
CMTR2	chr16:71323039-71323509	0.379	chr16:71323590-71323729	-0.377
CRISPLD2	chr16:84875626-84875871	0.499	chr16:84853587-84853739	-0.499
CTAGE5	chr14:39736304-39736393	0.238	chr14:39734465-39734625	-0.156
CTBP2	chr10:126849396-126849624	0.489	chr10:126850897-126851120	-0.255
CTBP2	chr10:126849396-126849624	0.489	chr10:126752904-126753340	-0.311
DDX58	chr9:32552432-32552626	0.228	chr9:32526060-32526322	-0.228
DGKA	chr12:56325812-56325907	0.352	chr12:56324946-56325128	-0.355
DLG3	chrX:69674946-69675113	0.649	chrX:69672155-69672605	-0.649
DNAJC6	chr1:65720111-65720332	0.391	chr1:65713699-65713986	-0.39
DST	chr6:56405078-56405361	0.227	chr6:56607069-56607510	-0.437
EFHD1	chr2:233498207-233498716	0.686	chr2:233470767-233470883	-0.223
EFHD1	chr2:233498207-233498716	0.686	chr2:233527290-233527409	-0.464
EFNA3	chr1:155057960-155058118	0.361	chr1:155051315-155051545	-0.362
EIF5A	chr17:7211288-7211432	0.199	chr17:7210318-7210434	-0.182
ELAC2	chr17:12921020-12921381	0.232	chr17:12920899-12921002	-0.231
EML1	chr14:100259681-100259880	0.38	chr14:100203706-100204197	-0.315
EPC1	chr10:32635862-32636464	0.253	chr10:32667419-32667820	-0.254
EPS8L1	chr19:55587221-55587287	0.328	chr19:55591760-55591909	-0.314
EXTL3	chr8:28558990-28559176	0.428	chr8:28480260-28480327	-0.429
FAM199X	chrX:103411121-103411390	0.415	chrX:103401730-103401831	-0.415
FAM20C	chr7:192969-193804	0.652	chr7:294696-294998	-0.656
FAM228B	chr2:24346350-24346403	0.395	chr2:24299744-24299839	-0.393
FBXO25	chr8:356808-357066	0.368	chr8:357154-357182	-0.368
FBXO7	chr22:32870674-32871111	0.296	chr22:32871224-32871385	-0.296
FBXW7	chr4:153456279-153456393	0.789	chr4:153273622-153274110	-0.79
FGGY	chr1:59762615-59762822	0.373	chr1:59892800-59893104	-0.435
FLJ46906	chr6:139013635-139013754	0.379	chr6:139012771-139013093	-0.386
FOXO3	chr6:108880974-108881134	0.382	chr6:108910853-108911018	-0.319
FURIN	chr15:91414769-91414835	0.516	chr15:91411822-91411941	-0.583
FUS	chr16:31191431-31191548	0.263	chr16:31194177-31194180	-0.263
FUT9	chr6:96463830-96464088	0.69	chr6:96644544-96644739	-0.75
GALNT7	chr4:174089904-174090112	0.229	chr4:174089350-174089731	-0.228
GATAD2B	chr1:153895209-153895451	0.296	chr1:153895775-153896192	-0.295
GCLM	chr1:94374594-94375227	0.329	chr1:94374221-94374441	-0.33
GEN1	chr2:17935414-17935612	0.242	chr2:17935177-17935234	-0.241
GORASP1	chr3:39148970-39149854	0.314	chr3:39146246-39148762	-0.314
GPBP1	chr5:56469760-56470038	0.169	chr5:56469652-56469753	-0.169
GPD2	chr2:157292900-157293025	0.447	chr2:157256881-157257081	-0.226
GRB14	chr2:165477629-165478360	0.225	chr2:165424825-165425060	-0.363
GTF2IRD1	chr7:73868120-73868506	0.766	chr7:73879632-73879799	-0.777
HIP1	chr7:75268369-75268563	0.292	chr7:75368119-75368290	-0.266
HK1	chr10:71078603-71078766	0.152	chr10:71077643-71077991	-0.152
HSD17B11	chr4:88274202-88274290	0.316	chr4:88312013-88312455	-0.316
HSPA9	chr5:137910927-137911502	0.281	chr5:137910643-137910680	-0.159
IQSEC1	chr3:13008887-13009198	0.296	chr3:13028471-13028677	-0.294
ITGB4	chr17:73717270-73717643	0.468	chr17:73720241-73720331	-0.226
ITGB4	chr17:73717270-73717643	0.468	chr17:73718432-73718602	-0.243
ITGB5	chr3:124605786-124606442	0.228	chr3:124620113-124620300	-0.328
JMJD1C	chr10:65281498-65281611	0.345	chr10:65028423-65028983	-0.427
KAT6B	chr10:76584701-76585432	0.196	chr10:76586171-76586543	-0.459
KCTD15	chr19:34287742-34287892	0.369	chr19:34290682-34291025	-0.308
KCTD2	chr17:73057315-73057391	0.392	chr17:73028662-73028819	-0.387
LARP1	chr5:154134845-154135231	0.238	chr5:154092388-154092690	-0.238
LBX2	chr2:74729794-74730443	0.277	chr2:74726460-74726685	-0.276
LIMK2	chr22:31608214-31608410	0.371	chr22:31643908-31644755	-0.37
LINC01578	chr15:93426073-93426416	0.207	chr15:93426526-93426773	-0.208
LOC100132111	chr1:151811727-151812542	0.232	chr1:151803338-151803636	-0.485
LOC100132111	chr1:151812700-151813261	0.251	chr1:151803338-151803636	-0.485
LOC100505938	chr7:8301760-8302035	0.27	chr7:8301038-8301198	-0.287
LOC283140	chr11:112160980-112161184	0.511	chr11:112141472-112141506	-0.516
LRRFIP1	chr2:238536222-238536383	0.302	chr2:238591719-238592138	-0.285
MAF1	chr8:145159305-145159761	0.53	chr8:145159870-145160052	-0.529
MAPK14	chr6:35995454-35996050	0.213	chr6:35996574-35996687	-0.213
MAPRE2	chr18:32621324-32621625	0.639	chr18:32558208-32558505	-0.698
MB	chr22:36018525-36018678	0.514	chr22:36019238-36019408	-0.514
MB21D2	chr3:192635420-192636065	0.235	chr3:192598291-192598450	-0.235
MBNL2	chr13:97874543-97874785	0.379	chr13:97794078-97794161	-0.379
MBTD1	chr17:49337196-49337427	0.247	chr17:49337481-49338462	-0.247
MCC	chr5:112823942-112824527	0.484	chr5:112630026-112630612	-0.484
MCF2L	chr13:113548651-113548745	0.476	chr13:113655673-113656297	-0.176
METAP1D	chr2:172864804-172864916	0.526	chr2:172886715-172886771	-0.528
MLLT10	chr10:21823031-21823423	0.452	chr10:21783772-21784587	-0.401
MPHOSPH10	chr2:71357444-71357884	0.203	chr2:71356878-71357217	-0.203
MRPL18	chr6:160211492-160211671	0.245	chr6:160210948-160211092	-0.246
MYO1C	chr17:1388988-1389095	0.323	chr17:1394894-1394972	-0.322
NACC1	chr19:13229102-13229268	0.211	chr19:13227019-13227245	-0.211
NARF	chr17:80416416-80416706	0.267	chr17:80416060-80416154	-0.22
NCK2	chr2:106361270-106361595	0.745	chr2:106470343-106470559	-0.744
NCOA2	chr8:71315935-71316234	0.227	chr8:71240082-71240231	-0.39
NCOA7	chr6:126111909-126112213	0.251	chr6:126240370-126240577	-0.325
NCOR2	chr12:125051854-125052010	0.447	chr12:125002686-125002877	-0.447
NDRG1	chr8:134309377-134309547	0.338	chr8:134261572-134261838	-0.224
NDUFAF4	chr6:97345542-97345778	0.171	chr6:97345159-97345327	-0.17
NEBL	chr10:21463133-21463427	0.722	chr10:21461637-21462010	-0.719
NEURL1	chr10:105314893-105315170	0.595	chr10:105308778-105308909	-0.598
NFE2L2	chr2:178129260-178129859	0.341	chr2:178128131-178128617	-0.341
NQO2	chr6:3000050-3000319	0.163	chr6:3001104-3001466	-0.163
NRCAM	chr7:108096687-108097125	0.509	chr7:107988413-107988479	-0.471
NREP	chr5:111093259-111093399	0.373	chr5:111322227-111327805	-0.36
NT5C2	chr10:104952993-104953063	0.229	chr10:104913048-104913487	-0.229
ODF2	chr9:131218285-131218534	0.286	chr9:131217434-131217507	-0.29
OSBPL10	chr3:32022391-32023342	0.411	chr3:31789932-31790156	-0.288
OSBPL9	chr1:52195486-52195673	0.252	chr1:52082546-52082893	-0.252
OXR1	chr8:107669848-107670313	0.792	chr8:107738335-107738537	-0.792
PAIP1	chr5:43557442-43557521	0.371	chr5:43556305-43556508	-0.37
PBX3	chr9:128508958-128509932	0.307	chr9:128510478-128510707	-0.307
PEPD	chr19:34012650-34012799	0.41	chr19:34000762-34000895	-0.409
PHACTR4	chr1:28696093-28696336	0.772	chr1:28764661-28764941	-0.773
PHF21A	chr11:46142486-46143088	0.424	chr11:45956061-45956240	-0.429
PHF23	chr17:7142565-7142825	0.212	chr17:7142105-7142249	-0.212
PIAS3	chr1:145575200-145575404	0.242	chr1:145575988-145576102	-0.242
PLCG1	chr20:39765573-39765675	0.169	chr20:39765871-39765941	-0.168
PLCH1	chr3:155462629-155462892	0.515	chr3:155448596-155448660	-0.518
PLEKHA7	chr11:17035863-17035963	0.26	chr11:16947073-16947419	-0.198
PLEKHG6	chr12:6419813-6420014	0.73	chr12:6421817-6422352	-0.262
PLEKHG6	chr12:6419813-6420014	0.73	chr12:6416039-6416159	-0.466
PLEKHH1	chr14:67999794-68000115	0.33	chr14:67999231-67999409	-0.338
PPP2R4	chr9:131902370-131902430	0.443	chr9:131870650-131870827	-0.16
PPP2R4	chr9:131902370-131902430	0.443	chr9:131873228-131873311	-0.284
PPP3R1	chr2:68479257-68480130	0.287	chr2:68477951-68478299	-0.288
PRPSAP2	chr17:18761381-18761574	0.406	chr17:18759599-18759742	-0.289
PRRC2B	chr9:134269297-134269650	0.535	chr9:134249077-134249118	-0.407
PRSS22	chr16:2907442-2907954	0.435	chr16:2908564-2908692	-0.437
PRTG	chr15:56035036-56035352	0.46	chr15:56034364-56034730	-0.48
PTGES2	chr9:130890334-130890467	0.204	chr9:130890527-130890741	-0.204
PTOV1	chr19:50354377-50354756	0.492	chr19:50353959-50354212	-0.492
PUM2	chr2:20550547-20550611	0.551	chr2:20550667-20550734	-0.488
PWWP2B	chr10:134210702-134210855	0.303	chr10:134222104-134222329	-0.301
PXDN	chr2:1748028-1748321	0.802	chr2:1661228-1661249	-0.737
RALBP1	chr18:9475452-9475689	0.53	chr18:9474973-9475174	-0.529
RANBP9	chr6:13711167-13711796	0.375	chr6:13710730-13710824	-0.394
RAPGEFL1	chr17:38334242-38334633	0.338	chr17:38333263-38333375	-0.34
RBM3	chrX:48432574-48432961	0.301	chrX:48433407-48433424	-0.301
RCAN1	chr21:35987059-35987579	0.785	chr21:35898961-35899308	-0.785
RFTN1	chr3:16554949-16555222	0.652	chr3:16524253-16524443	-0.652
RGS3	chr9:116225765-116226161	0.382	chr9:116343157-116343285	-0.391
RHOU	chr1:228870824-228871751	0.373	chr1:228782409-228782677	-0.371
RIPK1	chr6:3068743-3068895	0.35	chr6:3064071-3064293	-0.348
RPS6KA3	chrX:20284682-20285144	0.376	chrX:20236918-20237058	-0.233
RREB1	chr6:7108086-7108293	0.374	chr6:7109964-7110132	-0.263
RTTN	chr18:67872864-67873274	0.459	chr18:67957008-67957193	-0.459
RUSC2	chr9:35489630-35490169	0.583	chr9:35519244-35519463	-0.502
SCARB2	chr4:77134580-77135052	0.227	chr4:77155456-77155844	-0.226
SCYL2	chr12:100661177-100661570	0.362	chr12:100628190-100628575	-0.362
SDC1	chr2:20425023-20425194	0.365	chr2:20407688-20408049	-0.366
SEC14L1	chr17:75137005-75137136	0.242	chr17:75084725-75085031	-0.242
SFR1	chr10:105881929-105881954	0.441	chr10:105881804-105881912	-0.442
SFXN5	chr2:73298733-73298965	0.172	chr2:73297589-73297884	-0.172
SHISA5	chr3:48541452-48541682	0.463	chr3:48514419-48514742	-0.483
SIAH1	chr16:48419115-48419229	0.273	chr16:48399298-48399784	-0.274
SIPA1L1	chr14:71787119-71787220	0.262	chr14:71788127-71788248	-0.262
SLC11A2	chr12:51420098-51420199	0.369	chr12:51421960-51422058	-0.361
SLC2A10	chr20:45338257-45338379	0.316	chr20:45343078-45343261	-0.177
SLC2A11	chr22:24200040-24200216	0.3	chr22:24198890-24199178	-0.3
SLC44A2	chr19:10736171-10736346	0.378	chr19:10713121-10713237	-0.378
SLC4A2	chr7:150756657-150756849	0.606	chr7:150758342-150758608	-0.543
SLC6A9	chr1:44496978-44497402	0.473	chr1:44490315-44490858	-0.477
SLCO3A1	chr15:92396536-92397318	0.677	chr15:92484589-92484806	-0.681
SMAD3	chr15:67360103-67360251	0.251	chr15:67418054-67418322	-0.252
SNAPC3	chr9:15422782-15423191	0.419	chr9:15401608-15401638	-0.419
SNRNP70	chr19:49587679-49588893	0.499	chr19:49601428-49601515	-0.499
SNX10	chr7:26331515-26331706	0.191	chr7:26403945-26404122	-0.188
SOCS4	chr14:55493844-55494189	0.456	chr14:55494311-55494476	-0.456
SOCS6	chr18:67956126-67956326	0.218	chr18:67956914-67957103	-0.215
SPIDR	chr8:48173470-48173583	0.157	chr8:48454599-48454702	-0.156
SPRED2	chr2:65659498-65659880	0.397	chr2:65593724-65593931	-0.397
SQSTM1	chr5:179247842-179248141	0.219	chr5:179234003-179234123	-0.218
ST6GALNAC6	chr9:130661782-130661927	0.856	chr9:130667486-130667627	-0.751
ST8SIA4	chr5:100238547-100239113	0.413	chr5:100158570-100158960	-0.415
STARD10	chr11:72493700-72494002	0.255	chr11:72503920-72504750	-0.256
STAU1	chr20:47804653-47804904	0.495	chr20:47803405-47803480	-0.495
SUSD6	chr14:70078310-70078545	0.474	chr14:70124871-70125004	-0.35
SYTL5	chrX:37764396-37764583	0.277	chrX:37865835-37865921	-0.279
TAF6	chr7:99716952-99717021	0.223	chr7:99717318-99717481	-0.223
TBC1D1	chr4:37892500-37892969	0.358	chr4:38062566-38062732	-0.578
TBCB	chr19:36605888-36606576	0.204	chr19:36606730-36606830	-0.204
TCAIM	chr3:44379611-44379811	0.274	chr3:44379913-44380326	-0.274
TCEB1	chr8:74884105-74884143	0.237	chr8:74884480-74884522	-0.237
TFG	chr3:100428386-100428432	0.353	chr3:100428134-100428275	-0.353
TGM1	chr14:24733140-24733253	0.38	chr14:24732712-24733092	-0.377
TJP3	chr19:3721697-3721908	0.269	chr19:3708335-3708559	-0.269
TMCO3	chr13:114145308-114145588	0.559	chr13:114147801-114147982	-0.559
TMEM63B	chr6:44095363-44095415	0.214	chr6:44094389-44094452	-0.215
TMEM79	chr1:156252704-156252856	0.422	chr1:156254070-156254197	-0.422
TMEM9B	chr11:8986437-8986558	0.252	chr11:8985756-8986320	-0.251
TNFRSF10C	chr8:22941864-22942058	0.496	chr8:22962920-22963379	-0.489
TNIP2	chr4:2757741-2758117	0.227	chr4:2747756-2748037	-0.226
TPM1	chr15:63334838-63335142	0.296	chr15:63340622-63340906	-0.296
TPRA1	chr3:127309253-127309675	0.23	chr3:127309726-127309943	-0.229
TRIM28	chr19:59055836-59056464	0.176	chr19:59055413-59055578	-0.176
TRMT10A	chr4:100484715-100484892	0.206	chr4:100485070-100485214	-0.205
TSC22D1	chr13:45011312-45011390	0.389	chr13:45048354-45048437	-0.312
TSC22D3	chrX:107018330-107019017	0.233	chrX:106959545-106959711	-0.232
TTC7A	chr2:47168313-47168864	0.238	chr2:47143268-47143716	-0.238
TTC9	chr14:71108504-71109252	0.533	chr14:71131917-71132123	-0.375
UBE2D3	chr4:103790325-103790386	0.337	chr4:103746895-103747017	-0.384
UBE2E1	chr3:23847384-23847579	0.223	chr3:23851934-23852019	-0.222
UBL3	chr13:30423649-30424820	0.731	chr13:30415648-30415721	-0.733
UBQLN4	chr1:156023385-156023616	0.431	chr1:156030455-156030883	-0.431
UIMC1	chr5:176433651-176433795	0.231	chr5:176433285-176433443	-0.23
USP2	chr11:119234559-119234905	0.662	chr11:119252186-119252436	-0.639
USP39	chr2:85843215-85843579	0.185	chr2:85829965-85830204	-0.182
USP54	chr10:75385695-75386071	0.454	chr10:75361290-75361373	-0.463
WDR45	chrX:48937410-48937564	0.235	chrX:48957988-48958059	-0.235
WIBG	chr12:56320860-56320909	0.255	chr12:56321509-56321697	-0.254
WWC1	chr5:167718529-167719276	0.418	chr5:167743636-167743809	-0.325
XBP1	chr22:29196286-29196560	0.275	chr22:29195948-29196145	-0.272
YY1AP1	chr1:155658450-155658568	0.198	chr1:155658721-155658823	-0.2
ZBED9	chr6:28554075-28555112	0.309	chr6:28555239-28555606	-0.308
ZMIZ1	chr10:80828714-80829027	0.167	chr10:81024959-81025040	-0.533
ZMIZ1	chr10:81002583-81002726	0.44	chr10:81024959-81025040	-0.533
ZNF131	chr5:43120946-43121225	0.371	chr5:43121596-43121630	-0.439
ZNF292	chr6:87865269-87865477	0.273	chr6:87923281-87923583	-0.273
ZNF331	chr19:54024116-54025338	0.186	chr19:54057778-54057947	-0.256
ZNF652	chr17:47439271-47439476	0.458	chr17:47439775-47439835	-0.46
ZNF653	chr19:11639877-11639987	0.213	chr19:11639560-11639680	-0.213

## Sheet: S4_AlternativeTSS_ZF-D3A-mut
Gene	TSS1	TSS1_delta_PSI	TSS2	TSS2_delta_PSI
CDK19	chr6:111136212-111136662	0.279	chr6:111137011-111137097	-0.273
DLG3	chrX:69674946-69675113	0.234	chrX:69672155-69672605	-0.237
FGGY	chr1:59762625-59762822	0.448	chr1:59892802-59893104	-0.482
FOXP4-AS1	chr6:41513827-41513981	0.558	chr6:41515199-41515283	-0.565
HSD17B11	chr4:88274202-88274289	0.49	chr4:88312015-88312455	-0.489
MCF2L	chr13:113548656-113548745	0.518	chr13:113623535-113623772	-0.227
MCF2L	chr13:113548656-113548745	0.518	chr13:113655806-113656297	-0.29
NCOA7	chr6:126102019-126102517	0.534	chr6:126240370-126240577	-0.587
NCOR2	chr12:124873231-124873401	0.455	chr12:125002686-125002917	-0.322
OXR1	chr8:107669849-107670313	0.427	chr8:107738335-107738537	-0.49
PARD3	chr10:35103804-35104282	0.403	chr10:34987836-34988032	-0.402
RALBP1	chr18:9475530-9475689	0.299	chr18:9474970-9475174	-0.3
SLC5A6	chr2:27434768-27434813	0.209	chr2:27434579-27434629	-0.251
SUPT3H	chr6:45345505-45345788	0.397	chr6:45143764-45143842	-0.398
TARBP2	chr12:53895377-53895492	0.368	chr12:53894705-53894785	-0.368
TBL1X	chrX:9431335-9431502	0.418	chrX:9433054-9433487	-0.418
TCAIM	chr3:44379611-44379811	0.273	chr3:44379944-44380326	-0.273
TCEB1	chr8:74884105-74884143	0.166	chr8:74884480-74884522	-0.166
THADA	chr2:43823070-43823188	0.267	chr2:43690173-43690384	-0.268
TRMT10A	chr4:100484715-100484873	0.255	chr4:100485070-100485214	-0.255
ZC3H11A	chr1:203764751-203764903	0.165	chr1:203764656-203764741	-0.165
